# Supplementary material for: Operations research in global health: a scoping review with a focus on the themes of health equity and impact
Source: Health Res Policy Syst. 2017 Apr 18;15:32. doi: 10.1186/s12961-017-0187-7 (PMC5395767; doi:10.1186/s12961-017-0187-7)
Supplement: Supplementary file 2 — Database of references included in review. Description: An Excel database of the 1099 references included in the global overview of this review paper, including columns for Authors, Title, Journal and/or Conference and/or Book Title, Year, Volume, Pages, Conference location and/or Place Published, and Abstract. (XLSX 893 kb) [file 12961_2017_187_MOESM2_ESM.xlsx]

## Sheet: Reference Database
Authors	Title	Journal/Conference/Book Title	Year	Volume	Pages	Conference Location/Place Published	Publisher	Abstract
Aballea, S, Chancellor, J, Martin, M, Wutzler, P, Carrat, F, Gasparini, R, Toniolo-Neto, J, Drummond, M and Weinstein, M	The cost-effectiveness of influenza vaccination for people aged 50 to 64 years: An international model	Value in Health	2007	10	98-116			Objectives: Routine influenza vaccination is currently recommended in several countries for people aged more than 60 or 65 years or with high risk of complications. A lower age threshold of 50 years has been recommended in the United States since 1999. To help policymakers consider whether such a policy should be adopted more widely, we conducted an economic evaluation of lowering the age limit f…
Abbas, UL, Anderson, RM and Mellors, JW	Potential impact of antiretroviral therapy on HIV-1 transmission and AIDS mortality in resource-limited settings	Journal of Acquired Immune Deficiency Syndromes	2006	41	632-641			Objective: To estimate the potential impact of antiretroviral therapy on the heterosexual spread of HIV-1 infection and AIDS mortality in resource-limited settings. Methods: A mathematic model of HIV-1 disease progression and transmission was used to assess epidemiologic outcomes under different scenarios of antiretroviral therapy, including implementation of World Health Organization guidelines.…
Abbas, UL, Anderson, RM and Mellors, JW	Potential impact of antiretroviral chemoprophylaxis on HIV-1 transmission in resource-limited settings	PLoS ONE [Electronic Resource]	2007	2	e875			BACKGROUND: The potential impact of pre-exposure chemoprophylaxis (PrEP) on heterosexual transmission of HIV-1 infection in resource-limited settings is uncertain.;METHODOLOGY/PRINCIPLE FINDINGS: A deterministic mathematical model was used to simulate the effects of antiretroviral PrEP on an HIV-1 epidemic in sub-Saharan Africa under different scenarios (optimistic, neutral and pessimistic) both …
Abbas, UL, Glaubius, R, Mubayi, A, Hood, G and Mellors, JW	Antiretroviral therapy and pre-exposure prophylaxis: combined impact on HIV transmission and drug resistance in South Africa	Journal of Infectious Diseases	2013	208	224-34			BACKGROUND: The potential impact of antiretroviral therapy (ART) and pre-exposure prophylaxis (PrEP) with overlapping and nonoverlapping antiretrovirals (ARVs) on human immunodeficiency virus (HIV) transmission and drug resistance is unknown.;METHODS: A detailed mathematical model was used to simulate the epidemiological impact of ART alone, PrEP alone, and combined ART + PrEP in South Africa.;RE…
Abdollahi, SM and Ansari, Z	A data-driven goal programming model for the nurse scheduling problem	International Journal of Experimental Design and Process Optimisation	2013	3	294-310			The nurse scheduling problem is one of the most important challenges for human resources managers in the healthcare field. The problem deals with shift arrangements for the nursing staff. Real-world nurse scheduling schemes are often faced with various regulations related to safety and quality of services. In this paper, a goal programming-based nurse scheduling model is developed. The proposed m…
Abdullah, A, Hort, K, Abidin, AZ and Amin, FM	How much does it cost to achieve coverage targets for primary healthcare services? A costing model from Aceh, Indonesia	International Journal of Health Planning & Management	2012	27	226-45			Despite significant investment in improving service infrastructure and training of staff, public primary healthcare services in low-income and middle-income countries tend to perform poorly in reaching coverage targets. One of the factors identified in Aceh, Indonesia was the lack of operational funds for service provision. The objective of this study was to develop a simple and transparent costi…
Abimbola, TO and Marston, BJ	The cost-effectiveness of cotrimoxazole in people with advanced HIV infection initiating antiretroviral therapy in sub-Saharan Africa	Journal of Acquired Immune Deficiency Syndromes: JAIDS	2012	60	e8-e14			BACKGROUND: In sub-Saharan Africa, high mortality rates have been reported among patients with advanced HIV infection initiating antiretroviral therapy (ART). We evaluated the cost-effectiveness of expanding access to cotrimoxazole (CTX) for persons with HIV in averting mortality during the first 6 months of ART. We also evaluated possible cost savings related to prevention of specific opportunis…
Abimbola, TO, Marston, BJ, Date, AA, Blandford, JM, Sangrujee, N and Wiktor, SZ	Cost-effectiveness of tuberculosis diagnostic strategies to reduce early mortality among persons with advanced HIV infection initiating antiretroviral therapy	Journal of Acquired Immune Deficiency Syndromes: JAIDS	2012	60	e1-7			BACKGROUND: In sub-Saharan Africa, patients with advanced HIV experience high mortality during the first few months of antiretroviral therapy (ART), largely attributable to tuberculosis (TB). We evaluated the cost-effectiveness of TB diagnostic strategies to reduce this early mortality.;METHODS: We developed a decision analytic model to estimate the incremental cost, deaths averted, and cost-effe…
Abobaker, RA, Ayob, M and Hadwan, M	Greedy constructive heuristic and local search algorithm for solving nurse rostering problems	2011 3rd Conference on Data Mining and Optimization (DMO 2011), 28-29 June 2011	2011		194-8	Piscataway, NJ, USA	IEEE	The Nurse Rostering Problem (NRP) is one of the NP-hard problems that are difficult to solve for optimality. NRP deals with the distribution of working shifts to the staff nurses at healthcare organizations under given rules. Normally, NRP aims at generating a duty roster that satisfies all of the hard constraints (mandatory) and as many soft constraints (optional) as possible. This work introduc…
Abu-Raddad, LJ, Sabatelli, L, Achterberg, JT, Sugimoto, JD, Longini, IM, Jr., Dye, C and Halloran, ME	Epidemiological benefits of more-effective tuberculosis vaccines, drugs, and diagnostics	Proceedings of the National Academy of Sciences of the United States of America	2009	106	13980-5			The Bill and Melinda Gates Foundation supports an ambitious portfolio of novel vaccines, drug regimens, and diagnostic tools for tuberculosis (TB). We elicited the expected efficacies and improvements of the novel interventions in discussions with the foundations managing their development. Using an age-structured mathematical model of TB, we explored the potential benefits of novel interventions…
Abu-Zaineh, M, Mataria, A, Moatti, JP and Ventelou, B	Measuring and decomposing socioeconomic inequality in healthcare delivery: A microsimulation approach with application to the Palestinian conflict-affected fragile setting	Social Science & Medicine	2011	72	133-41			Socioeconomic-related inequalities in healthcare delivery have been extensively studied in developed countries, using standard linear models of decomposition. This paper seeks to assess equity in healthcare delivery in the particular context of the occupied Palestinian territory: the West Bank and the Gaza Strip, using a new method of decomposition based on microsimulations. Besides avoiding the …
Adebayo, SB, Fakolade, R, Anyanti, J, Ekweremadu, B, Ladipo, O and Ankomah, A	Modelling level, trend and geographical variations in stigma and discrimination against people living with HIV/AIDS in Nigeria	SAHARA J: Journal of Social Aspects of HIV/AIDS Research Alliance	2011	8	115-27			People living with HIV and AIDS (PLHA) often face stigma and discrimination. Stigma is a powerful tool for social control and PLHA are to varying degrees stigmatised against. Consequences of stigma and discrimination against PLHA may result in low turn-out for HIV counselling and testing, identity crises, isolation, loneliness, low self-esteem and lack of interest in containing the disease. To ac…
Adibi, P, Rezailashkajani, M, Roshandel, D, Behrouz, N, Ansari, S, Somi, MH, Shahraz, S and Zali, MR	An economic analysis of premarriage prevention of hepatitis B transmission in Iran	BMC Infectious Diseases	2004	4	31			BACKGROUND: To assess the economic aspects of HBV (hepatitis B virus) transmission prevention for premarriage individuals in a country with cultural backgrounds like Iran and intermediate endemicity of HBV infection.;METHODS: A cost-effectiveness analysis model was used from the health care system and society perspectives. The effectiveness was defined as the number of chronic HBV infections aver…
Adriana, O, Alexandru, C and Olimpia, B	The application of the EOQ model in the health services inventory management using WinQSB software	2010 2nd IEEE International Conference on Information Management and Engineering, ICIME 2010	2010	2	240-243	Chengdu		In our paper, we emphasize a concrete manner to solve an EOQ problem associated to inventory management practice in a consulting room. In the first part of the paper, we focus on the analysis of the health care management system in Romania, revealing the significant evolutions in this direction. The second part of the paper is dedicated to the EOQ model presentation and interpretation, by taking …
Aggarwal, R, Ghoshal, UC and Naik, SR	Treatment of chronic hepatitis B with interferon-alpha: cost-effectiveness in developing countries	National Medical Journal of India	2002	15	320-7			BACKGROUND: Treatment with interferon-alpha (IFN) has been shown to be cost-effective in developed countries. However, cost-effectiveness In developing countries such as India has not been studied.;METHODS: Using the Markov transitional probability model, we studied two cohorts of young patients (30 years of age) with chronic hepatitis B, one untreated and the other treated with interferon (IFN),…
Aggarwal, R, Ghoshal, UC and Naik, SR	Assessment of cost-effectiveness of universal hepatitis B immunization in a low-income country with intermediate endemicity using a Markov model	Journal of Hepatology	2003	38	215-22			BACKGROUND/AIMS: Most countries with high hepatitis B (HB) virus endemicity and most high-income countries have introduced immunization programmes against this infection. However, several low-income countries with intermediate HB endemicity have not done so. We performed a cost-effectiveness analysis of universal childhood HB immunization in such countries using India as an example, since availab…
Aguas, R, White, LJ, Snow, RW and Gomes, MG	Prospects for malaria eradication in sub-Saharan Africa	PLoS ONE [Electronic Resource]	2008	3	e1767			BACKGROUND: A characteristic of Plasmodium falciparum infections is the gradual acquisition of clinical immunity resulting from repeated exposures to the parasite. While the molecular basis of protection against clinical malaria remains unresolved, its effects on epidemiological patterns are well recognized. Accumulating epidemiological data constitute a valuable resource that must be intensively…
Ahmad, N, Ghani, NA, Kamil, AA and Tahar, RM	Emergency Department Problems: A Call for Hybrid Simulation	World Congress on Engineering (WCE 2012), 4-6 July 2012	2012	3	1470-4	Hong Kong, China	Newswood Limited	Emergency department (ED) is a unit in hospital that provides treatment for acutely ill and injured patients 24 hours daily. As a system, ED reveals detailed and dynamic complexity of its interaction between inter-departmental units and intra-departmental elements. Discrete event simulation (DES) has been recognized with its ability to comprehend micro level problems with detailed complexity. Fro…
Ahmad, N, Ghani, NA, Kamil, AA, Tahar, RM and Teo, AH	Evaluating emergency department resource capacity using simulation	Modern Applied Science	2012	6	9-19			Emergency departments open 24 hours every day and may receive patients at any time most unexpectedly. Adequate resource planning to meet the various demands in emergency departments is arguably amongst the most critical challenges faced by hospital administrators due to the complexity of the system and diverse patient flows. In this paper, we present a computer simulation model to evaluate resour…
Ahmad, RRA, Mahendradhata, Y, Cunningham, J, Utarini, A and de Vlas, SJ	How to optimize tuberculosis case finding: Explorations for Indonesia with a health system model	BMC Infectious Diseases	2009	9				Background: A mathematical model was designed to explore the impact of three strategies for better tuberculosis case finding. Strategies included: (1) reducing the number of tuberculosis patients who do not seek care; (2) reducing diagnostic delay; and (3) engaging non-DOTS providers in the referral of tuberculosis suspects to DOTS services in the Indonesian health system context. The impact of t…
Ahsan, K and Azeem, A	Operational Performance Analysis of a Public Hospital Laboratory	International Journal of Information Systems in the Service Sector	2010	2	22-38			Efficient utilization of scarce resources is an issue for any healthcare system. In developing countries, proper tools, techniques, and resources must be widely used in healthcare operational planning. Considering the necessity of effective resource planning, this study focuses on the rural healthcare system of Bangladesh and concentrates on the sub-district government hospital laboratory. The au…
Ahsan, MK and Bartlema, J	Monitoring healthcare performance by analytic hierarchy process: a developing-country perspective	International Transactions in Operational Research	2004	11	465-78			The formulation and solution of multi-criteria healthcare decision problems is of critical importance to the health and socio-economic betterment of developing countries. The study shows how the multi-criteria decision-making method could facilitate implementation of healthcare performance analysis, especially for the public healthcare system of Bangladesh, which operates mainly through thana hea…
Ajami, S, Ketabi, S, Yarmohammadian, MH and Bagherian, H	Wait time in emergency department (ED) processes	Medicinski arhiv	2012	66	53-57			Emergency Department (ED) provides urgency clinical and Para clinical care for patients who injured in accidents and incidents. Simulation is one of the decision supporting techniques that analyze risk factors and strategies in decision-making. The aim of this study was to determine the waiting time in emergency department services at Ayatolahkashani Hospital to propose scenarios for reducing wai…
Akaleephan, C, Wibulpolprasert, S, Sakulbumrungsil, R, Luangruangrong, P, Jitraknathee, A, Aeksaengsri, A, Udomaksorn, S, Tangcharoensathien, V and Tantivess, S	Extension of market exclusivity and its impact on the accessibility to essential medicines, and drug expense in Thailand: analysis of the effect of TRIPs-Plus proposal	Health Policy	2009	91	174-82			BACKGROUND: In Thailand and the US negotiating FTA, the 'TRIPs-Plus' is one of the US proposal which would result in an extension of market exclusivity of innovative drugs. In addition, it would foreseeably lead to high and unaffordable medicine prices and inaccessibility to essential medicines.;OBJECTIVE: To quantify the impact on medicine expense and medicine accessibility.;METHODS: Based on 20…
Akhtar, S, Carpenter, TE and Rathi, SK	A chain-binomial model for intra-household spread of Mycobacterium tuberculosis in a low socio-economic setting in Pakistan	Epidemiology & Infection	2007	135	27-33			A simulation study using Greenwood's chain-binomial model was carried out to elucidate the spread and control of Mycobacterium tuberculosis among the household contacts of infectious pulmonary tuberculosis (TB) patients. Based on the observed data, the maximum-likelihood estimates (+/-S.E.) of chain-binomial probabilities of intra-household M. tuberculosis transmission from an index case in 3-per…
Akin, L, Kaya, M, Altinel, S and Durand, L	Cost of pneumococcal infections and cost-effectiveness analysis of pneumococcal vaccination in at risk adults and elderly in Turkey	Human Vaccines	2011	7				Pneumococcal infections have a substantial burden in Turkey, particularly in the elderly (>60 years) and at-risk adults (18-59 years). VCR is low at approximately 2%. The first aim of this study was the evaluation of the burden of pneumococcal infections (pneumonia and bacteremia) from a public payer perspective in elderly and at-risk adults. The second aim was the evaluation of cost effectivenes…
Akta≈ü, E, √úlengin, F and √ñnsel ≈ûahin, S	A decision support system to improve the efficiency of resource allocation in healthcare management	Socio-Economic Planning Sciences	2007	41	130-146			Limitations in healthcare funding require hospitals to find more effective ways to utilize resources. An effective patient management system is critically dependent on the accurate analysis of individual patient outcomes and resource utilization. In the current paper, a management-oriented decision support model is thus proposed to assist health system managers in improving the efficiency of thei…
Akumu, AO, English, M, Scott, JAG and Griffiths, UK	Economic evaluation of delivering Haemophilus influenzae type b vaccine in routine immunization services in Kenya	Bulletin of the World Health Organization	2007	85	511-518			Objective: Haemophilus influenzae type b (Hib) vaccine was introduced into routine immunization services in Kenya in 2001. We aimed to estimate the cost-effectiveness of Hib vaccine delivery. Methods: A model was developed to follow the Kenyan 2004 birth cohort until death, with and without Hib vaccine. Incidence of invasive Hib disease was estimated at Kilifi District Hospital and in the surroun…
Al-Arydah, M and Smith, R	Controlling malaria with indoor residual spraying in spatially heterogenous environments	Mathematical Biosciences & Engineering: MBE	2011	8	889-914			Indoor residual spraying-spraying insecticide inside houses to kill mosquitoes-has been one of the most effective methods of disease control ever devised, being responsible for the near-eradication of malaria from the world in the third quarter of the twentieth century and saving tens of millions of lives. However, with malaria resurgence currently underway, it has received relatively little atte…
Al-Hawari, T, Al-Natour, M, Ababneh, B and Ahmed, A	Improving productivity and quality of service in internal medicine clinics through simulation	61st Annual Conference and Expo of the Institute of Industrial Engineers, May 21, 2011 - May 25, 2011	2011			Reno, NV	Institute of Industrial Engineers	This paper presents a case study in which discrete event simulation is used to study, analyze and enhance the productivity and quality of service in an internal medicine clinic in a local hospital in Jordan. The simulation models all the intricate details of the daily activities inside the clinic from patient reception and registration, to preliminary nurse checkups as well as doctors' schedules …
Al-Inany, HG, Abou-Setta, AM, Aboulghar, MA, Mansour, RT and Serour, GI	HMG versus rFSH for ovulation induction in developing countries: a cost-effectiveness analysis based on the results of a recent meta-analysis	Reproductive Biomedicine Online	2006	12	163-9			Both cost and effectiveness should be considered conjointly to aid judgments about drug choice. Therefore, based on the results of a recent published meta-analysis, a Markov model was developed to conduct a cost-effectiveness analysis for estimation of the cost of an ongoing pregnancy in IVF/intracytoplasmic sperm injection (ICSI) cycles. In addition, Monte Carlo micro-simulation was used to exam…
Alam, SJ	Exploring the role of state grants and pensions in rural South Africa: An agent-based model	20th IASTED International Conference on Modelling and Simulation, MS 2009	2009		308-313	Banff, AB		We present results from an agent-based simulation model of the social impact of HIV/AIDS in the Sekhukhune district of the Limpopo province in South Africa. AIDS in the Sub-Saharan region has not only affected individual's health but has long-term implications for the economic development of the society. The impact of the disease relates to stresses such as food insecurity, high climate variabili…
Alavian, SM, Mirahmadizadeh, A, Javanbakht, M, Keshtkaran, A, Heidari, A, Mashayekhi, A, Salimi, S and Hadian, M	Effectiveness of Methadone Maintenance Treatment in Prevention of Hepatitis C Virus Transmission among Injecting Drug Users	Hepatitis Monthly	2013	13	6			Background: Injecting drug users (IDUs) are a major and most important risk factor for rising hepatitis C virus (HCV) prevalence in Iran. Objectives: The objective of this study was to determine the effectiveness of methadone maintenance treatment (MMT) in prevention of HCV infection transmission among IDUs. Patients and Methods: A mathematical modeling has been used to estimate number of HCV inf…
Aldridge, RW, Iglesias, D, Caceres, CF and Miranda, JJ	Determining a cost effective intervention response to HIV/AIDS in Peru	BMC Public Health	2009	9	352			BACKGROUND: The HIV epidemic in Peru is still regarded as concentrated -- sentinel surveillance data shows greatest rates of infection in men who have sex with men, while much lower rates are found in female sex workers and still lower in the general population. Without an appropriate set of preventive interventions, continuing infections could present a challenge to the sustainability of the pre…
Alexander, CA, Busch, G and Stringer, K	Implementing and interpreting a data envelopment analysis model to assess the efficiency of health systems in developing countries	IMA Journal of Management Mathematics	2003	14	49-63			This paper presents a data envelopment analysis model that can be implemented by public sector management for assessing the efficiency of a health system within a developing country. To illustrate the practical implementation and interpretation of the model this study compares health systems across 51 developing countries using 1998‚Äì99 data. The results of the analysis generated empirical indic…
Alexander, N, Sutherland, C, Roper, C, Ciss√©, B and Schellenberg, D	Modelling the impact of intermittent preventive treatment for malaria on selection pressure for drug resistance	Malaria Journal	2007	6				Background. Intermittent preventive treatment (IPT) is a promising intervention for malaria control, although there are concerns about its impact on drug resistance. Methods. The key model inputs are age-specific values for a) baseline anti-malarial dosing rate, b) parasite prevalence, and c) proportion of those treated with anti-malarials (outside IPT) who are infected. These are used to estimat…
Alistar, SS, Grant, PM and Bendavid, E	Comparative effectiveness and cost-effectiveness of antiretroviral therapy and pre-exposure prophylaxis for HIV prevention in South Africa	BMC Medicine	2014	12				Background: Antiretroviral therapy (ART) and oral pre-exposure prophylaxis (PrEP) are effective in reducing HIV transmission in heterosexual adults. The epidemiologic impact and cost-effectiveness of combined prevention approaches in resource-limited settings remain unclear.Methods: We develop a dynamic mathematical model of the HIV epidemic in South Africa's adult population. We assume ART reduc…
Alistar, SS, Owens, DK and Brandeau, ML	Effectiveness and cost effectiveness of expanding harm reduction and antiretroviral therapy in a mixed HIV epidemic: a modeling analysis for Ukraine	PLoS Medicine / Public Library of Science	2011	8	e1000423			BACKGROUND: Injection drug use (IDU) and heterosexual virus transmission both contribute to the growing mixed HIV epidemics in Eastern Europe and Central Asia. In Ukraine-chosen in this study as a representative country-IDU-related risk behaviors cause half of new infections, but few injection drug users (IDUs) receive methadone substitution therapy. Only 10% of eligible individuals receive antir…
Aljunid, S, Abuduxike, G, Ahmed, Z, Sulong, S, Nur, AM and Goh, A	Impact of routine PCV7 (Prevenar) vaccination of infants on the clinical and economic burden of pneumococcal disease in Malaysia	BMC Infectious Diseases	2011	11	248			BACKGROUND: Pneumococcal disease is the leading cause of vaccine-preventable death in children younger than 5 years of age worldwide. The World Health Organization recommends pneumococcal conjugate vaccine as a priority for inclusion into national childhood immunization programmes. Pneumococcal vaccine has yet to be included as part of the national vaccination programme in Malaysia although it ha…
Aljunid, S, Maimaiti, N, Ahmed, Z, Muhammad Nur, A, Md Isa, Z, Azmi, S and Sulong, S	Economic Impact of Pneumococcal Protein-D Conjugate Vaccine (PHiD-CV) on the Malaysian National Immunization Programme	Value in Health Regional Issues	2014	3	146-155			Objective: To assess the cost-effectiveness of introducing pneumococcal polysaccharide and nontypeable Haemophilus influenzae protein D conjugate vaccine (PHiD-CV) in the National Immunization Programme of Malaysia. This study compared introducing PHiD-CV (10 valent vaccine) with current no vaccination, as well as against the alternative 13-valent pneumococcal conjugate vaccine (PCV13). Methods: …
Alley, WS, van Oortmarssen, GGJ, Boatin, BBA, Nagelkerke, N, Plaisier, AAP, Remme, HJ, Lazdins, J, Borsboom, G and Habbema, JDF	Macrofilaricides and onchocerciasis control, mathematical modelling of the prospects for elimination	Bmc Public Health	2001	1	5			Background: In most endemic parts of the world, onchocerciasis ( river blindness) control relies, or will soon rely, exclusively on mass treatment with the microfilaricide ivermectin. Worldwide eradication of the parasite by means of this drug is unlikely. Macrofilaricidal drugs are currently being developed for human use. Methods: We used ONCHOSIM, a microsimulation mathematical model of the dyn…
Almeida, AM, da Silva, AL, Cherchiglia, ML, Andrade, EI, de Oliveira, GL and Acurcio Fde, A	Chronic hepatitis B treatment: the cost-effectiveness of interferon compared to lamivudine	Value in Health	2011	14	S24-8			OBJECTIVE: To perform a cost-effectiveness evaluation from the perspective of the Brazilian National Health System of alternatives strategies (i.e., conventional interferon, pegylated interferon, and lamivudine) for the treatment of patients with chronic hepatitis B who present elevated aminotransferase levels and no evidence of cirrhosis at the beginning of treatment.;METHODS: A Markov model was…
Alolayyan, MNF, Ali, KAM, Idris, F and Ibrehem, AS	Advance mathematical model to study and analyse the effects of total quality management (TQM) and operational flexibility on hospital performance	Total Quality Management and Business Excellence	2011	22	1371-1393			Total quality management (TQM) and operational flexibility are powerful and evolving management tools that are being implemented in many organisations worldwide, particularly in healthcare services. However, such implementation is yet to be seen in developing nations, particularly in health care. In an attempted response to such a gap, this paper provides a literature review on the principles and…
Alsallaq, RA, Baeten, JM, Celum, CL, Hughes, JP, Abu-Raddad, LJ, Barnabas, RV and Hallett, TB	Understanding the potential impact of a combination HIV prevention intervention in a hyper-endemic community	PLoS ONE [Electronic Resource]	2013	8	e54575			OBJECTIVES: Despite demonstrating only partial efficacy in preventing new infections, available HIV prevention interventions could offer a powerful strategy when combined. In anticipation of combination HIV prevention programs and research studies we estimated the population-level impact of combining effective scalable interventions at high population coverage, determined the factors that influen…
Alsallaq, RA, Cash, B, Weiss, HA, Longini Jr, IM, Omer, SB, Wawer, MJ, Gray, RH and Abu-Raddad, LJ	Quantitative assessment of the role of male circumcision in HIV epidemiology at the population level	Epidemics	2009	1	139-152			Objective: Three recent randomized trials have shown that male circumcision (circumcision) reduces HIV incidence in heterosexual men by about 60%. Mathematical models are needed to assess the historical role of circumcision in the observed disparate levels of prevalence in sub-Saharan Africa and to translate these findings into estimates of the population-level impact of circumcision on HIV preva…
Alsallaq, RA, Schiffer, JT, Longini Jr, IM, Wald, A, Corey, L and Abu-Raddad, LJ	Population level impact of an imperfect prophylactic vaccine for herpes simplex virus-2	Sexually Transmitted Diseases	2010	37	290-297			Background: The continuation of developing Herpes simplex virus type-2 (HSV-2) prophylactic vaccines requires parallel mathematical modeling to quantify the effect on the population of these vaccines. Methods: Using mathematical modeling we derived 3 summary measures for the population effect of imperfect HSV-2 vaccines as a function of their efficacies in reducing susceptibility (VES), genital s…
Alvis, N, De La Hoz, F, Gamboa, O, Cediel, N, Rico, A, Paternina, A and Alvis, L	Epidemiological and economic impact of tetanus vaccination in Colombian adults	Revista Panamericana De Salud Publica-Pan American Journal of Public Health	2011	30	209-216			Objective. Assess the potential epidemiological and economic impact of vaccinating the over-15 Colombian population against tetanus with a booster dose every 10 years. Methods. A cost-effectiveness analysis of tetanus vaccination with a booster dose every 10 years was conducted in Colombia and compared with the current strategy (2, 4, 6, 18, and 60 months). Estimates of the burden of disease were…
Amirfar, S, Hollenberg, JP and Abdool Karim, SS	Modeling the impact of a partially effective HIV vaccine on HIV infection and death among women and infants in South Africa	Journal of Acquired Immune Deficiency Syndromes: JAIDS	2006	43	219-25			OBJECTIVE: To assess the potential impact over 10 years of a partially effective HIV vaccine in a cohort of 15-year-old adolescent girls in South Africa in terms of HIV infections and deaths prevented in mothers and infants.;METHODS: A computer simulation was constructed using a population of all 15-year-old adolescent girls in South Africa followed for 10 years. A partially effective vaccine is …
Anderson, ST, Laxminarayan, R and Salant, SW	Diversify or focus? Spending to combat infectious diseases when budgets are tight	Journal of Health Economics	2012	31	658-675			We consider a health authority seeking to allocate annual budgets optimally over time to minimize the discounted social cost of infection(s) evolving in a finite set of groups. This optimization problem is challenging since the standard SIS epidemiological model describing the spread of the disease contains a nonconvexity. Neither optimal control nor standard discrete-time dynamic programming can…
Andersson, KM, Owens, DK and Paltiel, AD	Scaling up circumcision programs in Southern Africa: The potential impact of gender disparities and changes in condom use behaviors on heterosexual HIV transmission	AIDS and Behavior	2011	15	938-948			Circumcision significantly reduces female-to-male transmission of HIV infection, but changes in behavior may influence the overall impact on transmission. We sought to explore these effects, particularly for societies where women have less power to negotiate safe sex. We developed a compartmental epidemic model to simulate the population-level impact of various circumcision programs on heterosexu…
Andersson, KM, Owens, DK, Vardas, E, Gray, GE, McIntyre, JA and Paltiel, AD	Predicting the impact of a partially effective HIV vaccine and subsequent risk behavior change on the heterosexual HIV epidemic in low- and middle-income countries: A South African example	Journal of Acquired Immune Deficiency Syndromes: JAIDS	2007	46	78-90			We developed a mathematical model to simulate the impact of various partially effective preventive HIV vaccination scenarios in a population at high risk for heterosexually transmitted HIV. We considered an adult population defined by gender (male/female), disease stage (HIV-negative, HIV-positive, AIDS, and death), and vaccination status (unvaccinated/vaccinated) in Soweto, South Africa. Input d…
Andersson, KM, Paltiel, AD and Owens, DK	The potential impact of an HIV vaccine with rapidly waning protection on the epidemic in Southern Africa: examining the RV144 trial results	Vaccine	2011	29	6107-12			BACKGROUND: The prime-boost HIV vaccine regimen used in the recent RV144 trial resulted in modest efficacy of 31% over 3.5 years, but was substantially higher in the first year post-vaccination. We sought to explore the potential impact of a vaccine with rapidly waning efficacy in a South African population.;METHODS: We explored two strategies using a dynamic compartmental epidemic model for hete…
Andersson, KM and Stover, J	The potential impact of a moderately effective HIV vaccine with rapidly waning protection in South Africa and Thailand	Vaccine	2011	29	6092-9			BACKGROUND: Although published data from the recent ALVAC/AIDSVAX trial in Thailand (RV144) indicated the HIV vaccine provided very modest protection overall (31.2%), new analysis of trial data has suggested higher efficacy levels earlier in the follow-up period. CDC and UNAIDS organized several modeling research teams to explore the implications of the trial results and potential utility of this…
Andres-Gamboa, O, Chicaiza, L, Garcia-Molina, M, Diaz, J, Gonzalez, M, Murillo, R, Ballesteros, M and Sanchez, R	Cost-effectiveness of conventional cytology and HPV DNA testing for cervical cancer screening in Colombia	Salud Publica de Mexico	2008	50	276-85			OBJECTIVE: To assess cost-effectiveness of conventional cytology and HPV DNA testing for cervical-cancer screening in Colombia.;MATERIAL AND METHODS: The National Cancer Institute of Colombia (NCIC) in 2007 developed a Markov model on the natural history of cervical cancer; no screening, conventional cytology, and HPV DNA testing were compared. Only direct costs were used. Outcomes comprise cervi…
Andrews, JR and Basu, S	Transmission dynamics and control of cholera in Haiti: an epidemic model	Lancet	2011	377	1248-55			BACKGROUND: Official projections of the cholera epidemic in Haiti have not incorporated existing disease trends or patterns of transmission, and proposed interventions have been debated without comparative estimates of their effect. We used a mathematical model of the epidemic to provide projections of future morbidity and mortality, and to produce comparative estimates of the effects of proposed…
Andrews, JR, Lawn, SD, Rusu, C, Wood, R, Noubary, F, Bender, MA, Horsburgh, CR, Losina, E, Freedberg, KA and Walensky, RP	The cost-effectiveness of routine tuberculosis screening with Xpert MTB/RIF prior to initiation of antiretroviral therapy: a model-based analysis	Aids	2012	26	987-95			BACKGROUND: In settings with high tuberculosis (TB) prevalence, 15-30% of HIV-infected individuals initiating antiretroviral therapy (ART) have undiagnosed TB. Such patients are usually screened by symptoms and sputum smear, which have poor sensitivity.;OBJECTIVE: To project the clinical and economic outcomes of using Xpert MTB/RIF(Xpert), a rapid TB/rifampicin-resistance diagnostic, to screen in…
Andrews, JR, Wood, R, Bekker, LG, Middelkoop, K and Walensky, RP	Projecting the benefits of antiretroviral therapy for HIV prevention: the impact of population mobility and linkage to care	Journal of Infectious Diseases	2012	206	543-51			BACKGROUND: Recent mathematical models suggested that frequent human immunodeficiency virus (HIV) testing with immediate initiation of antiretroviral therapy (ART) to individuals with a positive test result could profoundly curb transmission. The debate about ART as prevention has focused largely on parameter values. We aimed to evaluate structural assumptions regarding linkage to care and popula…
Anglaret, X, Scott, CA, Walensky, RP, Ouattara, E, Losina, E, Moh, R, Becker, JE, Uhler, L, Danel, C, Messou, E, Eholi√©, S and Freedberg, KA	Could early antiretroviral therapy entail more risks than benefits in sub-Saharan African HIV-infected adults? A model-based analysis	Antiviral Therapy	2013	18	45-55			Background: Initiation of antiretroviral therapy (ART) in all HIV-infected adults, regardless of CD4+ T-cell count, is a proposed strategy for reducing HIV transmission. We investigated the conditions under which starting ART early could entail more risks than benefits for patients with high CD4 + T-cell counts. Methods: We used a simulation model to compare ART initiation upon entry to care ('im…
Ansari, Z and Aley, A	Nurse Rostering through 0-1 Multi Objective Programming for ICU Department of DR Shariati Hospital in Isfahan	3rd 2012 International Conference on Industrial Engineering and Operations Management, 3-6 July 2012	2012		131	Istanbul, Turkey	IEOM Forum	Summary form only given. In this study, a 0-1 goal programming model is developed for nurse scheduling. It is adapted to Isfahan Dr Shariati hospital program (in Iran) to improve the current manual made schedules. The developed model accounts both for hospital objectives and nurses' preferences, in addition to considering some policies related to nurse scheduling. Hospital objectives include to c…
Apolloni, A, Poletto, C and Colizza, V	Age-specific contacts and travel patterns in the spatial spread of 2009 H1N1 influenza pandemic	BMC Infectious Diseases	2013	13	176			BACKGROUND: Confirmed H1N1 cases during late spring and summer 2009 in various countries showed a substantial age shift between importations and local transmission cases, with adults mainly responsible for seeding unaffected regions and children most frequently driving community outbreaks.;METHODS: We introduce a multi-host stochastic metapopulation model with two age classes to analytically inve…
April, MD, Wood, R, Berkowitz, BK, Paltiel, AD, Anglaret, X, Losina, E, Freedberg, KA and Walensky, RP	The survival benefits of antiretroviral therapy in South Africa	Journal of Infectious Diseases	2014	209	491-499			Background. We sought to quantify the survival benefits attributable to antiretroviral therapy (ART) in South Africa since 2004.Methods. We used the Cost-Effectiveness of Preventing AIDS Complications-International model (CEPAC) to simulate 8 cohorts of human immunodeficiency virus (HIV)-infected patients initiating ART each year during 2004-2011. Model inputs included cohort-specific mean CD4+ T…
Ara√∫jo, DV, Teich, V, Passos, RBF and Martins, SCO	Analysis of the cost-effectiveness of thrombolysis with alteplase in stroke	Arquivos Brasileiros de Cardiologia	2010	95	12-20			Background: The cerebrovascular accident (CVA) or stroke is the main cause of death in Brazil and little information is available on the cost of treatment. Objective: To carry out a cost-effectiveness analysis of thrombolysis in stroke, up to three hours after symptom onset, comparing the treatment with alteplase versus the conservative treatment, under the perspective of the Brazilian Public Hea…
Ara√∫jo, DV, Tura, BR, Brasileiro, AL, Neto, HL, Pav√£o, ALB and Teich, V	Cost-effectiveness of prehospital versus inhospital thrombolysis in acute myocardial infarction	Arquivos Brasileiros de Cardiologia	2008	90	91-98+100-107			Background: There is evidence that prehospital thrombolysis improves the outcome in ST-elevation myocardial infarction (STEMI). Objective: This study aimed at comparing the cost-effectiveness of prehospital compared to inhospital thrombolysis for STEMI from the National Health System perspective. Methods: A decision-analytic model was used to compare these two strategies. The study endpoint was l…
Arias, AM, Masson, WM, Bluro, IM, Oberti, PF, Falconi, ML, Pizarro, R, Krauss, JG and Cagide, AM	Cost-Effectiveness analysis of alternative strategies for the management of patients with cryptogenic stroke and patent foramen ovale	Revista Argentina de Cardiologia	2011	79	6			Background Patent foramen ovale (PFO) has been associated with cryp-togenic stroke (CS). There are still some controversies about the best treatment to prevent recurrences in patients with CS and PFO. Our region lacks cost-utility analysis of the management of these patients. Objectives To construct a decision model for the management of patients with CS and PFO and to establish the cost-utility …
Arocena, P and Garcia-Prado, A	Accounting for quality in the measurement of hospital performance: evidence from Costa Rica	Health Economics	2007	16	667-85			This paper provides insights into how Costa Rican public hospitals responded to the pressure for increased efficiency and quality introduced by the reforms carried out over the period 1997-2001. To that purpose we compute a generalized output distance function by means of non-parametric mathematical programming to construct a productivity index, which accounts for productivity changes while contr…
Arreola Ornelas, H, Rosado Buzzo, A, Garcia, L, Dorantes Aguilar, J, Contreras Hernandez, I and Mould Quevedo, JF	Cost-effectiveness analysis of pharmacologic treatment of fibromyalgia in Mexico	Reumatologia Clinica	2012	8	120-7			OBJECTIVE: To identify, from the Mexican Public Health System perspective, which would be the most cost-effective treatment for patients with Fibromyalgia (FM).;MATERIAL AND METHODS: A Markov model including three health states, divided by pain intensity (absence or presence of mild, moderate or severe pain) and considering three-month cycles; costs and effectiveness were estimated for amitriptyl…
Asfaw, A, Von Braun, J and Klasen, S	How big is the crowding-out effect of user fees in the rural areas of Ethiopia? Implications for equity and resources mobilization	World Development	2004	32	2065-2081			Using a nested multinomial logit model, this study investigates the demand "reduction" and "diversion" effects of user fees in rural areas of Ethiopia. The results reveal that an increase in user fees of public clinics, which are the most widely used alternative, can have a significant demand reduction effect on the poorest of the poor. This implies that despite cost recovery has been advocated a…
Asim Azim, M, Jianwu, D, Yangping, W and Fengwen, Z	Coverage based empirical modelling for EMS rescue system of Karachi (Pakistan)	Tehnicki Vjesnik	2014	21	561-566			Emergency Medical Services (EMS) is a major source of handling emergencies. Most of the emergencies have one patient. The routine systems are not able to respond to emergencies in which there are many casualties. The mass-casualty disaster response and EMS services plans have become more popular in case of ordinary disasters and terrorist attacks over the past decades. But it might not be possibl…
Assem, M, Ouda, BK and Wahed, MA	Improving operating theatre design using facilities layout planning	2012 Cairo International Biomedical Engineering Conference (CIBEC 2012), 20-22 Dec. 2012	2012		109-13	Piscataway, NJ, USA	IEEE	Operating theatre (OT) is one of the most critical departments within the hospital. In developing countries, no allocation of sufficient areas for OT, that results in sharing of many services in the same area while ignoring others. Facilities layout planning (FLP) is widely used in industrial engineering for designing block layout plans as it considers the assignment of services to the proper loc…
Assi, TM, Brown, ST, Djibo, A, Norman, BA, Rajgopal, J, Welling, JS, Chen, SI, Bailey, RR, Kone, S, Kenea, H, Connor, DL, Wateska, AR, Jana, A, Wisniewski, SR, Van Panhuis, WG, Burke, DS and Lee, BY	Impact of changing the measles vaccine vial size on Niger's vaccine supply chain: a computational model	BMC Public Health	2011	11	425			BACKGROUND: Many countries, such as Niger, are considering changing their vaccine vial size presentation and may want to evaluate the subsequent impact on their supply chains, the series of steps required to get vaccines from their manufacturers to patients. The measles vaccine is particularly important in Niger, a country prone to measles outbreaks.;METHODS: We developed a detailed discrete even…
Assi, TM, Brown, ST, Kone, S, Norman, BA, Djibo, A, Connor, DL, Wateska, AR, Rajgopal, J, Slayton, RB and Lee, BY	Removing the regional level from the Niger vaccine supply chain	Vaccine	2013	31	2828-34			OBJECTIVE: Since many of the world's vaccine supply chains contain multiple levels, the question remains of whether removing a level could bring efficiencies.;METHODS: We utilized HERMES to generate a detailed discrete-event simulation model of Niger's vaccine supply chain and compared the current four-tier (central, regional, district, and integrated health center levels) with a modified three-t…
Assi, TM, Rookkapan, K, Rajgopal, J, Sornsrivichai, V, Brown, ST, Welling, JS, Norman, BA, Connor, DL, Chen, SI, Slayton, RB, Laosiritaworn, Y, Wateska, AR, Wisniewski, SR and Lee, BY	How influenza vaccination policy may affect vaccine logistics	Vaccine	2012	30	4517-23			BACKGROUND: When policymakers make decision about the target populations and timing of influenza vaccination, they may not consider the impact on the vaccine supply chains, which may in turn affect vaccine availability.;PURPOSE: Our goal is to explore the effects on the Thailand vaccine supply chain of introducing influenza vaccines and varying the target populations and immunization time-frames.…
Atashili, J, Kalilani, L, Seksaria, V and Sickbert-Bennett, EE	Potential impact of infant feeding recommendations on mortality and HIV-infection in children born to HIV-infected mothers in Africa: a simulation	BMC Infectious Diseases	2008	8	66			BACKGROUND: Although breast-feeding accounts for 15-20% of mother-to-child transmission (MTCT) of HIV, it is not prohibited in some developing countries because of the higher mortality associated with not breast-feeding. We assessed the potential impact, on HIV infection and infant mortality, of a recommendation for shorter durations of exclusive breast-feeding (EBF) and poor compliance to these …
Atashili, J, Smith, JS, Adimora, AA, Eron, J, Miller, WC and Myers, E	Potential impact of antiretroviral therapy and screening on cervical cancer mortality in HIV-positive women in sub-Saharan Africa: a simulation	PLoS ONE [Electronic Resource]	2011	6	e18527			BACKGROUND: Despite having high cervical cancer incidence and mortality rates, screening for cervical precancerous lesions remains infrequent in sub-Saharan Africa. The need to screen HIV-positive women because of the higher prevalence and faster progression of cervical precancerous lesions may be heightened by the increased access to highly-active antiretroviral therapy (HAART). Policymakers nee…
Athan, E, O'Brien, DP and Legood, R	Cost-effectiveness of routine and low-cost CD4 T-cell count compared with WHO clinical staging of HIV to guide initiation of antiretroviral therapy in resource-limited settings	Aids	2010	24	1887-95			BACKGROUND: HIV is a major cause of disease and death in sub-Saharan Africa. Provision and scale-up of antiretroviral therapy (ART) in resource-limited settings is feasible and cost-effective. Initiation of ART is guided by WHO stage or CD4 cell count; the latter may not be available and up to 70% of eligible individuals are not identified. Low-cost CD4 cell count tests are comparable to conventi…
Atherly, D, Dreibelbis, R, Parashar, UD, Levin, C, Wecker, J and Rheingans, RD	Rotavirus vaccination: cost-effectiveness and impact on child mortality in developing countries	Journal of Infectious Diseases	2009	200 Suppl 1	S28-38			BACKGROUND: Rotavirus is the leading cause of severe gastroenteritis in children <5 years of age and is responsible for >500,000 deaths annually; approximately 85% of this burden is in low-income countries eligible for financial support from the GAVI Alliance. We projected the uptake, health impact, and cost-effectiveness of introducing rotavirus vaccination in GAVI-eligible countries to help pol…
Atherly, DE, Lewis, KD, Tate, J, Parashar, UD and Rheingans, RD	Projected health and economic impact of rotavirus vaccination in GAVI-eligible countries: 2011-2030	Vaccine	2012	30 Suppl 1	A7-14			Rotavirus is the leading cause of diarrheal disease in children under 5 years of age. It is responsible for more than 450,000 deaths each year, with more than 90% of these deaths occurring in low-resource countries eligible for support by the GAVI Alliance. Significant efforts made by the Alliance and its partners are providing countries with the opportunity to introduce rotavirus vaccines into t…
Auvert, B, Marseille, E, Korenromp, EL, Lloyd-Smith, J, Sitta, R, Taljaard, D, Pretorius, C, Williams, B and Kahn, JG	Estimating the Resources Needed and Savings Anticipated from Roll-Out of Adult Male Circumcision in Sub-Saharan Africa	PLoS ONE	2008	3	e2679			<sec> <title>Background</title> <p>Trials in Africa indicate that medical adult male circumcision (MAMC) reduces the risk of HIV by 60%. MAMC may avert 2 to 8 million HIV infections over 20 years in sub-Saharan Africa and cost less than treating those who would have been infected. This paper estimates the financial and human resources required to roll out MAMC and the net savings due to reduced i…
Ayieko, P, Griffiths, UK, Ndiritu, M, Moisi, J, Mugoya, IK, Kamau, T, English, M and Scott, JA	Assessment of health benefits and cost-effectiveness of 10-valent and 13-valent pneumococcal conjugate vaccination in Kenyan children	PLoS ONE [Electronic Resource]	2013	8	e67324			BACKGROUND: The GAVI Alliance supported 10-valent pneumococcal conjugate vaccine (PCV10) introduction in Kenya. We estimated the cost-effectiveness of introducing either PCV10 or the 13-valent vaccine (PCV13) from a societal perspective and explored the incremental impact of including indirect vaccine effects.;METHODS: The costs and effects of pneumococcal vaccination among infants born in Kenya …
Ayob, M, Hadwan, M, Nazri, MZA and Ahmad, Z	Enhanced harmony search algorithm for nurse rostering problems	Journal of Applied Sciences	2013	13	846-853			Drawing up the nurses' duty roster is one of the main key issues that are faced by hospital managements, this study focuses on Nurse Rostering Problem (NRP), an NP-hard problem, that is difficult to solve for optimality. Harmony Search Algorithm (HSA) refers to the meta-heuristic algorithm inspired by the improvisation of Jazz musicians. Due to the problem of slow convergence of the basic HSA, th…
Azadi, M and Farzipoor Saen, R	A combination of QFD and imprecise DEA with enhanced Russell graph measure: A case study in healthcare	Socio-Economic Planning Sciences	2013	47	281-291			Quality function deployment (QFD) is a proven tool for process and product development, which translates the voice of customer (VoC) into engineering characteristics (EC), and prioritizes the ECs, in terms of customer's requirements. Traditionally, QFD rates the design requirements (DRs) with respect to customer needs, and aggregates the ratings to get relative importance scores of DRs. An increa…
Azevedo, RS and Amaku, M	Modelling immunization strategies with cytomegalovirus vaccine candidates	Epidemiology & Infection	2011	139	1818-26			In order to analyse the impact of vaccination against cytomegalovirus (CMV) on congenital infection incidence using current vaccines tested in phase II clinical trials, we simulated different scenarios by mathematical modelling, departing from the current vaccine characteristics, varying age at vaccination, immunity waning, vaccine efficacy and mixing patterns. Our results indicated that the opti…
Babigumira, JB, Levin, A, Burgess, C, Garrison, LP, Jr., Bauch, CT, Braka, F, Mbabazi, WB, Nabyonga, JO, Simons, E and Dabbagh, A	Assessing the cost-effectiveness of measles elimination in Uganda: local impact of a global eradication program	Journal of Infectious Diseases	2011	204 Suppl 1	S116-23			BACKGROUND: Measles control has succeeded worldwide, and many countries have substantially reduced incidence and mortality. This has led to consideration of the feasibility of measles elimination in Uganda within the context of global eradication. Before an elimination program is initiated, it is important to consider its potential economic impact, including its cost-effectiveness.;METHODS: Incre…
Babigumira, JB, Sethi, AK, Smyth, KA and Singer, ME	Cost effectiveness of facility-based care, home-based care and mobile clinics for provision of antiretroviral therapy in Uganda	Pharmacoeconomics	2009	27	963-73			Stakeholders in HIV/AIDS care currently use different programmes for provision of antiretroviral therapy (ART) in Uganda. It is not known which of these represents the best value for money. To compare the cost effectiveness of home-based care (HBC), facility-based care (FBC) and mobile clinic care (MCC) for provision of ART in Uganda. Incremental cost-effectiveness analysis was performed using de…
Babigumira, JB, Stergachis, A, Choi, HL, Dodoo, A, Nwokike, J and Garrison Jr, LP	A framework for assessing the economic value of pharmacovigilance in low- and middle-income countries	Drug Safety	2014	37	127-134			Pharmacovigilance (PV) programs are an essential component of national healthcare systems. Well-functioning PV programs can improve population health by identifying and reducing medicines-related problems (MRPs). Many low- and middle-income countries lack functional PV systems, but this deficiency has not been described in terms of the potential economic value of strengthening PV systems. The ass…
Babigumira, JB, Stergachis, A, Veenstra, DL, Gardner, JS, Ngonzi, J, Mukasa-Kivunike, P and Garrison, LP	Estimating the costs of induced abortion in Uganda: a model-based analysis	BMC Public Health	2011	11	904			BACKGROUND: The demand for induced abortions in Uganda is high despite legal and moral proscriptions. Abortion seekers usually go to illegal, hidden clinics where procedures are performed in unhygienic environments by under-trained practitioners. These abortions, which are usually unsafe, lead to a high rate of severe complications and use of substantial, scarce healthcare resources. This study w…
Babigumira, JB, Stergachis, A, Veenstra, DL, Gardner, JS, Ngonzi, J, Mukasa-Kivunike, P and Garrison, LP	Potential cost-effectiveness of universal access to modern contraceptives in Uganda	PLoS ONE [Electronic Resource]	2012	7	e30735			BACKGROUND: Over two thirds of women who need contraception in Uganda lack access to modern effective methods. This study was conducted to estimate the potential cost-effectiveness of achieving universal access to modern contraceptives in Uganda by implementing a hypothetical new contraceptive program (NCP) from both societal and governmental (Ministry of Health (MoH)) perspectives.;METHODOLOGY/P…
Bacaer, N, Ouifki, R, Pretorius, C, Wood, R and Williams, B	Modeling the joint epidemics of TB and HIV in a South African township	Journal of Mathematical Biology	2008	57	557-93			We present a simple mathematical model with six compartments for the interaction between HIV and TB epidemics. Using data from a township near Cape Town, South Africa, where the prevalence of HIV is above 20% and where the TB notification rate is close to 2,000 per 100,000 per year, we estimate some of the model parameters and study how various control measures might change the course of these ep…
Bacaer, N, Pretorius, C and Auvert, B	An age-structured model for the potential impact of generalized access to antiretrovirals on the South African HIV epidemic	Bulletin of Mathematical Biology	2010	72	2180-98			A simple mathematical model (Granich et al., Lancet 373:48-57, 2009) suggested recently that annual HIV testing of the population, with all detected HIV(+) individuals immediately treated with antiretrovirals, could lead to the long-term decline of HIV in South Africa and could save millions of lives in the next few years. However, the model suggested that the long-term decline of HIV could not b…
Bachmann, MO	Effectiveness and cost effectiveness of early and late prevention of HIV/AIDS progression with antiretrovirals or antibiotics in Southern African adults	AIDS Care	2006	18	109-20			As HIV/AIDS drugs are becoming more widely available in Southern Africa, we compared the effectiveness and cost effectiveness of different treatment options, using a Markov Monte Carlo simulation model based on published estimates of disease progression, treatment effectiveness and health care costs. Cost and outcome values were discounted. Quality of life was considered. Acceptability curves sum…
Bachmann, MO	Cost effectiveness of community-based therapeutic care for children with severe acute malnutrition in Zambia: decision tree model	Cost Eff Resour Alloc	2009	7	2			BACKGROUND: Children aged under five years with severe acute malnutrition (SAM) in Africa and Asia have high mortality rates without effective treatment. Primary care-based treatment of SAM can have good outcomes but its cost effectiveness is largely unknown. METHOD: This study estimated the cost effectiveness of community-based therapeutic care (CTC) for children with severe acute malnutrition i…
Badri, M, Cleary, S, Maartens, G, Pitt, J, Bekker, LG, Orell, C and Wood, R	When to initiate highly active antiretroviral therapy in sub-Saharan Africa? A South African cost-effectiveness study	Antiviral Therapy	2006	11	63-72			Background: Large-scale programmes increasing access to highly active antiretroviral therapy (HAART) are being implemented in sub-Saharan Africa. However, cost-effectiveness of initiating treatment at different CD4 count thresholds has not been explored in resource-poor settings. Methods: A cost-effectiveness analysis was conducted from a public health perspective using primary treatment outcomes…
Baeza, A, Bouma, MJ, Dhiman, R and Pascual, M	Malaria control under unstable dynamics: Reactive vs. climate-based strategies	Acta Tropica	2013	129	42-51			In areas of the world where malaria prevails under unstable conditions, attacking the adult vector population through insecticide-based Indoor Residual Spraying (IRS) is the most common method for controlling epidemics. Defined in policy guidance, the use of Annual Parasitic Incidence (API) is an important tool for assessing the effectiveness of control and for planning new interventions. To inve…
Baggaley, RF, Garnett, GP and Ferguson, NM	Modelling the impact of antiretroviral use in resource-poor settings	PLoS Medicine / Public Library of Science	2006	3	e124			BACKGROUND: The anticipated scale-up of antiretroviral therapy (ART) in high-prevalence, resource-constrained settings requires operational research to guide policy on the design of treatment programmes. Mathematical models can explore the potential impacts of various treatment strategies, including timing of treatment initiation and provision of laboratory monitoring facilities, to complement ev…
Bahia, LR, Araujo, DV, Pepe, C, Trindade, M, Camargo, CM and Javaroni, V	Cost-effectiveness analysis of medical treatment of benign prostatic hyperplasia in the Brazilian public health system	International Braz J Urol	2012	38	595-605			OBJECTIVE: To perform a cost-effectiveness analysis of medical treatment of benign prostatic hyperplasia (BPH) under Brazilian public health system perspective (Unified Health System--"Sistema Unico de Saude (SUS)").;MATERIAL AND METHODS: A revision of the literature of the medical treatment of BPH using alpha-blockers, 5-alpha-reductase inhibitors and combinations was carried out. A panel of spe…
Bai, Y, Ye, M, Cao, H, Ma, X, Xu, Y and Wu, B	Economic evaluation of radiotherapy for early breast cancer after breast-conserving surgery in a health resource-limited setting	Breast Cancer Research & Treatment	2012	136	547-57			The primary objective was to assess the cost-effectiveness, from the Chinese societal perspective, of additional radiotherapy for women with early breast cancer after breast-conserving surgery (BCS). The Markov model was constructed to simulate women's transitions across various health states based on the clinical course of breast cancer (no recurrence, local or distant recurrence, and death) and…
Bailey, PE, Keyes, EB, Parker, C, Abdullah, M, Kebede, H and Freedman, L	Using a GIS to model interventions to strengthen the emergency referral system for maternal and newborn health in Ethiopia	International Journal of Gynaecology & Obstetrics	2011	115	300-9			OBJECTIVES: To show how GIS can be used by health planners to make informed decisions about interventions to increase access to emergency services.;METHODS: A combination of data sources, including the 2008 national Ethiopian baseline assessment for emergency obstetric and newborn care that covered 797 geo-coded health facilities, LandScan population data, and road network data, were used to mode…
Bakir, M, Standaert, B, Turel, O, Bilge, ZE and Postma, M	Estimating and comparing the clinical and economic impact of paediatric rotavirus vaccination in Turkey using a simple versus an advanced model	Vaccine	2013	31	979-86			BACKGROUND: The burden of rotavirus disease is high in Turkey, reflecting the large birth cohort (>1.2 million) and the risk of disease. Modelling can help to assess the potential economic impact of vaccination. We compared the output of an advanced model with a simple model requiring fewer data inputs. If the results are similar, this could be helpful for countries that have few data available.;…
Bakir, M, T√ºrel, O and Topachevskyi, O	Cost-effectiveness of new pneumococcal conjugate vaccines in Turkey: A decision analytical model	BMC Health Services Research	2012	12				Background: Streptococcus pneumoniae infections, which place a considerable burden on healthcare resources, can be reduced in a cost-effective manner using a 7-valent pneumococcal conjugate vaccine (PCV-7). We compare the cost effectiveness of a 13-valent PCV (PCV-13) and a 10-valent pneumococcal non-typeable Haemophilus influenzae protein D conjugate vaccine (PHiD-CV) with that of PCV-7 in Turke…
Ball, F and Lyne, O	Optimal vaccination schemes for epidemics among a population of households, with application to variola minor in Brazil	Statistical Methods in Medical Research	2006	15	481-97			This paper is concerned with stochastic models for the spread of an epidemic among a community of households, in which individuals mix uniformly within households and, in addition, uniformly at a much lower rate within the population at large. This two-level mixing structure has important implications for the threshold behaviour of the epidemic and, consequently, for both the effectiveness of vac…
Baltussen, R, Naus, J and Limburg, H	Cost-effectiveness of screening and correcting refractive errors in school children in Africa, Asia, America and Europe	Health Policy	2009	89	201-15			OBJECTIVE: To estimate the costs and effects of alternative strategies for annual screening of school children for refractive errors, and the provision of spectacles, in different WHO sub-regions in Africa, Asia, America and Europe.;METHODS: We developed a mathematical simulation model for uncorrected refractive error, using prevailing prevalence and incidence rates. Remission rates reflected the…
Baltussen, R and Smith, A	Cost-effectiveness of selected interventions for hearing impairment in Africa and Asia: a mathematical modelling approach	International Journal of Audiology	2009	48	144-58			The purpose of this paper was to present estimates of costs and effects of selected interventions for hearing impairment in Africa and Asia. The method used mathematical simulation models on the basis of WHO burden of disease information, and WHO-CHOICE costing databases. Findings showed that in both regions, screening strategies for hearing impairment and delivery of hearing aids cost between I$…
Baltussen, R and Smith, A	Cost effectiveness of strategies to combat vision and hearing loss in sub-Saharan Africa and South East Asia: mathematical modelling study	Bmj	2012	344	e615			OBJECTIVE: To determine the relative costs, effects, and cost effectiveness of selected interventions to control cataract, trachoma, refractive error, hearing loss, meningitis and chronic otitis media.;DESIGN: Cost effectiveness analysis of or combined strategies for controlling vision and hearing loss by means of a lifetime population model.;SETTING: Two World Health Organization sub-regions of …
Barbu, C, Dumonteil, E and Gourbiere, S	Optimization of control strategies for non-domiciliated Triatoma dimidiata, Chagas disease vector in the Yucatan Peninsula, Mexico	PLoS Neglected Tropical Diseases [electronic resource]	2009	3	e416			BACKGROUND: Chagas disease is the most important vector-borne disease in Latin America. Regional initiatives based on residual insecticide spraying have successfully controlled domiciliated vectors in many regions. Non-domiciliated vectors remain responsible for a significant transmission risk, and their control is now a key challenge for disease control.;METHODOLOGY/PRINCIPAL FINDINGS: A mathema…
Barnighausen, T, Bloom, DE and Humair, S	Economics of antiretroviral treatment vs. circumcision for HIV prevention	Proceedings of the National Academy of Sciences of the United States of America	2012	109	21271-21276			The HIV Prevention Trials Network (HPTN) 052 study, which showed the effectiveness of antiretroviral treatment in reducing HIV transmission, has been hailed as a "game changer" in the fight against HIV, prompting calls for scaling up treatment as prevention (TasP). However, it is unclear how TasP can be financed, given flat-lining support for global HIV programs. We assess whether TasP is indeed …
B√§rnighausen, T, Bloom, DE and Humair, S	Human resources for treating HIV/AIDS: Needs, capacities, and gaps	AIDS Patient Care and STDs	2007	21	799-812			Despite recent international efforts to scale-up antiretroviral treatment (ART), more than 5 million people needing ART in low- and middle-income countries (LMIC) do not receive it. Limited human resources to treat HIV/AIDS (HRHA) are one of the main constraints to achieving universal ART coverage. We model the gap between needed and available HRHA to quantify the challenge of achieving and susta…
Barouni, M, Ghaderi, H and Shahmoradi, MK	The economic evaluation of screening for colorectal cancer: Case of Iran	Clinical Laboratory	2013	59	667-74			BACKGROUND: Given increasing rates of colorectal cancer (CRC) in countries with intermediate incidence rates, the decision to implement population-based screening must consider the trade-off between high costs and a relatively low yield. We estimated the incremental cost-effectiveness ratio of 10 strategies for colorectal cancer screening, as well as no screening, incorporating quality of life, n…
Bassett, IV, Govindasamy, D, Erlwanger, AS, Hyle, EP, Kranzer, K, van Schaik, N, Noubary, F, Paltiel, AD, Wood, R, Walensky, RP, Losina, E, Bekker, LG and Freedberg, KA	Mobile HIV Screening in Cape Town, South Africa: Clinical Impact, Cost and Cost-Effectiveness	Plos One	2014	9	11			Background: Mobile HIV screening may facilitate early HIV diagnosis. Our objective was to examine the cost-effectiveness of adding a mobile screening unit to current medical facility-based HIV testing in Cape Town, South Africa. Methods and Findings: We used the Cost Effectiveness of Preventing AIDS Complications International (CEPAC-I) computer simulation model to evaluate two HIV screening stra…
Basu, S, Andrews, JR, Poolman, EM, Gandhi, NR, Shah, NS, Moll, A, Moodley, P, Galvani, AP and Friedland, GH	Prevention of nosocomial transmission of extensively drug-resistant tuberculosis in rural South African district hospitals: an epidemiological modelling study	Lancet	2007	370	1500-7			BACKGROUND: Extensively drug-resistant (XDR) tuberculosis has spread among hospitalised patients in South Africa, but the epidemic-level effect of hospital-based infection control strategies remains unknown. We modelled the plausible effect of rapidly available infection control strategies on the overall course of the XDR tuberculosis epidemic in a rural area of South Africa.;METHODS: We investig…
Basu, S, Babiarz, KS, Ebrahim, S, Vellakkal, S, Stuckler, D and Goldhaber-Fiebert, JD	Palm oil taxes and cardiovascular disease mortality in India: economic-epidemiologic model	Bmj	2013	347	f6048			OBJECTIVE: To examine the potential effect of a tax on palm oil on hyperlipidemia and on mortality due to cardiovascular disease in India.;DESIGN: Economic-epidemiologic model.;MODELING METHODS: A microsimulation model of mortality due to myocardial infarction and stroke among Indian populations was constructed, incorporating nationally representative data on systolic blood pressure, total choles…
Basu, S, Glantz, S, Bitton, A and Millett, C	The effect of tobacco control measures during a period of rising cardiovascular disease risk in India: a mathematical model of myocardial infarction and stroke	PLoS Medicine / Public Library of Science	2013	10	e1001480			BACKGROUND: We simulated tobacco control and pharmacological strategies for preventing cardiovascular deaths in India, the country that is expected to experience more cardiovascular deaths than any other over the next decade.;METHODS AND FINDINGS: A microsimulation model was developed to quantify the differential effects of various tobacco control measures and pharmacological therapies on myocard…
Basu, S, Maru, D, Poolman, E and Galvani, A	Primary and secondary tuberculosis preventive treatment in HIV clinics: simulating alternative strategies	International Journal of Tuberculosis & Lung Disease	2009	13	652-8			BACKGROUND: Isoniazid preventive treatment (IPT) has been recommended for human immunodeficiency virus (HIV) infected individuals.;OBJECTIVE/DESIGN: We used a mathematical model to simulate the benefits and risks of preventive treatment delivered through antiretroviral (ARV) clinics using clinical data from Botswana.;RESULTS: Preventive treatment was found to reduce the incidence of tuberculosis …
Basu, S, Stuckler, D and McKee, M	Addressing institutional amplifiers in the dynamics and control of tuberculosis epidemics	American Journal of Tropical Medicine & Hygiene	2011	84	30-7			Tuberculosis outbreaks originating in prisons, mines, or hospital wards can spread to the larger community. Recent proposals have targeted these high-transmission institutional amplifiers by improving case detection, treatment, or reducing the size of the exposed population. However, what effects these alternative proposals may have is unclear. We mathematically modeled these control strategies a…
Basu, S, Stuckler, D and McKee, M	An alternative mechanism for international health aid: Evaluating a Global Social Protection Fund	Health Policy and Planning	2014	29	127-136			Several public health groups have called for the creation of a global fund for 'social protection'-a fund that produces the international equivalent of domestic tax collection and safety net systems to finance care for the ill and disabled and related health costs. All participating countries would pay into a global fund based on a metric of their ability to pay and withdraw from the common pool …
Basu, S, Stuckler, D, Vellakkal, S and Ebrahim, S	Dietary salt reduction and cardiovascular disease rates in India: a mathematical model	PLoS ONE [Electronic Resource]	2012	7	e44037			BACKGROUND: Reducing salt intake has been proposed to prevent cardiovascular disease in India. We sought to determine whether salt reductions would be beneficial or feasible, given the worry that unrealistically large reductions would be required, worsening iodine deficiency and benefiting only urban subpopulations.;METHODS AND RESULTS: Future myocardial infarctions (MI) and strokes in India were…
Bauch, CT, Szusz, E and Garrison, LP	Scheduling of measles vaccination in low-income countries: projections of a dynamic model	Vaccine	2009	27	4090-8			Large-scale vaccination campaigns (SIAs) and improved routine immunization (RI) have greatly reduced measles incidence in low-income countries. However, the interval between SIAs required to maintain these gains over the long term is not clear. We developed a dynamic model of measles transmission to assess measles vaccination strategies in Cambodia, Ghana, India, Morocco, Nigeria, and Uganda. We …
Baussano, I, Lazzarato, F, Ronco, G, Dillner, J and Franceschi, S	Benefits of catch-up in vaccination against human papillomavirus in medium- and low-income countries	International Journal of Cancer	2013	133	1876-81			Human papillomavirus (HPV) vaccination of a birth cohort of girls in the 9-13 age range is recommended as a priority, but decreases in HPV vaccine cost may make catch-up of a few additional cohorts more attractive not only in high-income countries. We assessed the reduction in HPV16 and 18 infections that could be achieved in a medium- (Poland) and a low-income (Guinea) country by adding one-time…
Becker-Dreps, SI, Biddle, AK, Pettifor, A, Musuamba, G, Imbie, DN, Meshnick, S and Behets, F	Cost-effectiveness of adding bed net distribution for malaria prevention to antenatal services in Kinshasa, Democratic Republic of the Congo	American Journal of Tropical Medicine & Hygiene	2009	81	496-502			We evaluated the cost-effectiveness of distributing insecticide-treated bed nets (ITNs) for malaria prevention at antenatal clinics in Kinshasa, Democratic Republic of the Congo. A decision tree model was used to estimate costs, outcomes, and incremental cost-effectiveness for 17,893 pregnant women attending 28 antenatal clinics who received long-lasting ITNs free of charge. Costs including purch…
Belkadi, K and Tanguy, A	Modelling and simulation of the pharmacy for the university hospital center of Oran (Algeria)	22nd Annual European Simulation and Modelling Conference, ESM 2008	2008		399-403	Le Havre	EUROSIS	Pharmacy is an essential part of the hospital. Its mission is the supply and delivery of pharmaceutical products to various hospital services. These products arc mainly drugs, dressings, instrumentations.... The aim of this paper is to model and simulate the pharmacy of University Hospital Center of Oran (UHCO) in Algeria using ASCI methodology. The pharmacy service is mainly composed of two Sub-…
Belkadi, K and Tanguy, A	MODELLING AND SIMULATION OF THE STOMATOLOGY SERVICE FOR THE RMUHO	European Simulation and Modelling Conference 2009	2009		213-218	Ghent	Eurosis	Stomatology is the part of medicine that relates to the mouth and its diseases; originally practised by physicians, it was a standard medical speciality through the early 20th century but in the U.S. it is now the domain of dentists. Stomatology service is an essential part of the hospital. The aim of this paper is to model and simulate the Stomatology service of Regional Military and University …
Belkadi, K and Tanguy, A	Modelling and simulation of the opthalmology service for RMUHO	12th WSEAS International Conference on Automatic Control, Modelling and Simulation, ACMOS '10	2010		278-286	Catania		The aim of this paper is to model and simulate the ophthalmology service of Regional Military and University Hospital of Oran (RMUHO) in Algeria using ASDI methodology (Analysis, Specification, Design and Implementation). Ophthalmology is a medical science apprentice of anatomy, diseases, vision disorders, eye therapy and its annexes. The ophthalmology service is an essential unit and occupies an…
Belkadi, K, Zahaf, N and Tanguy, A	Modelling and simulation of the maternity for the UHCO	24th Annual European Simulation and Modelling Conference, ESM 2010	2010		271-275	Hasselt	EUROSIS	The maternity hospital is an essential service of the main hospital. The aim of this paper is to model and simulate the maternity and related services of University Hospital Centre of Oran (UHCO) in Algeria using ASDI methodology. It is mainly composed of services providing cares and surgery for pregnant women, mothers, babies and persons suffering gynaecological or oncological pathology. Our aim…
Bellamine-BenSaoud, N and Rateb, F	Combating malaria: A complex system and agent-based approach	Application of Agents and Intelligent Information Technologies	2006		66-86		IGI Global	In this chapter, we investigate how complexity theory and more particularly how agent-based modeling and simulation can benefit the explanation of the impact of education on malaria health care in Haiti. Our model includes: (1) the environment, encompassing mainly cities, roads, hospitals and schools; (2) the agents, modeling the human actors, who can be safe or infected by malaria disease accord…
Bendavid, E, Grant, P, Talbot, A, Owens, DK and Zolopa, A	Cost-effectiveness of antiretroviral regimens in the World Health Organization's treatment guidelines: a South African analysis	Aids	2011	25	211-20			OBJECTIVE: the World Health Organization (WHO) recently changed its first-line antiretroviral treatment guidelines in resource-limited settings. The cost-effectiveness of the new guidelines is unknown.;DESIGN: comparative effectiveness and cost-effectiveness analysis using a model of HIV disease progression and treatment.;METHODS: using a simulation of HIV disease and treatment in South Africa, w…
Bendavid, E, Wood, R, Katzenstein, DA, Bayoumi, AM and Owens, DK	Expanding antiretroviral options in resource-limited settings - A cost-effectiveness analysis	Journal of Acquired Immune Deficiency Syndromes	2009	52	106-113			BACKGROUND: Current World Health Organization (WHO) guidelines for treatment of HIV in resource-limited settings call for 2 antiretroviral regimens. The effectiveness and cost-effectiveness of increasing the number of antiretroviral regimens is unknown. METHODS: Using a simulation model, we compared the survival and costs of current WHO regimens with two 3-regimen strategies: an initial regimen o…
Bendavid, E, Young, SD, Katzenstein, DA, Bayoumi, AM, Sanders, GD and Owens, DK	Cost-effectiveness of HIV monitoring strategies in resource-limited settings: a southern African analysis	Arch Intern Med	2008	168	1910-8			BACKGROUND: Although the number of infected persons receiving highly active antiretroviral therapy (HAART) in low- and middle-income countries has increased dramatically, optimal disease management is not well defined. METHODS: We developed a model to compare the costs and benefits of 3 types of human immunodeficiency virus monitoring strategies: symptom-based strategies, CD4-based strategies, an…
Bender, MA, Kumarasamy, N, Mayer, KH, Wang, B, Walensky, RP, Flanigan, T, Schackman, BR, Scott, CA, Lu, Z and Freedberg, KA	Cost-effectiveness of tenofovir as first-line antiretroviral therapy in India	Clinical Infectious Diseases	2010	50	416-25			BACKGROUND: World Health Organization guidelines for antiretroviral treatment (ART) in resource-limited settings recommend either stavudine or tenofovir as part of initial therapy. We evaluated the clinical outcomes and cost-effectiveness of first-line ART using tenofovir in India, compared with current practice using stavudine or zidovudine.;METHODS: We used a state-transition model of human imm…
Bennis, F, Amghar, M, Sbiti, N and Elouadi, A	Scheduling case simulation to performance evaluation of hospital productivity	Journal of Theoretical and Applied Information Technology	2014	63	181-189			The block is a strategic and complicated system in the hospital. It uses diversified and expensive human resources, material and information flow. In this field which investments are very expensive, simulation is a tool for decision-making to analyze the operation and detect malfunctions for dimensioning the system and obtaining the performance. We develop in this article a C++ simulation with a …
Bergh, M, Marais, CA, Miller-Jans√∂n, H, Salie, F and Stander, MP	Economic appraisal of dabigatran as first-line therapy for stroke prevention in atrial fibrillation	South African Medical Journal	2013	103	241-245			Background. Dabigatran is an oral anticoagulant direct thrombin inhibitor recently registered in South Africa (SA) to reduce the risk of stroke and systemic embolism in patients with atrial fibrillation (AF). Owing to the price disparity between warfarin (the current gold standard for treatment of patients with AF) and dabigatran, we conducted an economic appraisal of the use of dabigatran compar…
Bertoldi, EG, Rohde, LE, Zimerman, LI, Pimentel, M and Polanczyk, CA	Cost-effectiveness of cardiac resynchronization therapy in patients with heart failure: the perspective of a middle-income country's public health system	International Journal of Cardiology	2013	163	309-15			BACKGROUND: Cardiac resynchronization therapy (CRT) improves symptoms and survival in patients with heart failure (HF). However, the devices used to deliver it are costly and can impose a significant burden to the relatively constrained health budgets of middle-income countries such as Brazil.;METHODS: A Markov model was constructed, representing the follow-up of a hypothetical cohort of HF patie…
Bertolli, J, Hu, DJ, Nieburg, P, Macalalad, A and Simonds, RJ	Decision analysis to guide choice of interventions to reduce mother-to-child transmission of HIV	Aids	2003	17	2089-98			INTRODUCTION: Antiretroviral prophylaxis, avoidance of breastfeeding, and early weaning are candidates to prevent mother-to-child transmission (MTCT) of HIV worldwide.;METHODS: We developed a model to help guide population-level decisions about MTCT intervention strategies. We estimated the numbers of early childhood deaths prevented by (1) prenatal short-course zidovudine, (2) intrapartum and ne…
Bester, MJ, Nieuwoudt, I and Van Vuuren, JH	Finding good nurse duty schedules: A case study	Journal of Scheduling	2007	10	387-405			Constructing duty schedules for nurses at large hospitals is a difficult problem. The objective is usually to ensure that there is always sufficient staff on duty, while taking into account individual preferences with respect to work patterns, requests for leave and financial restrictions, in such a way that all employees are treated fairly. The problem is typically solved via mixed integer progr…
Binagwaho, A, Pegurri, E, Muita, J and Bertozzi, S	Male circumcision at different ages in Rwanda: a cost-effectiveness study	PLoS Medicine / Public Library of Science	2010	7	e1000211			BACKGROUND: There is strong evidence showing that male circumcision (MC) reduces HIV infection and other sexually transmitted infections (STIs). In Rwanda, where adult HIV prevalence is 3%, MC is not a traditional practice. The Rwanda National AIDS Commission modelled cost and effects of MC at different ages to inform policy and programmatic decisions in relation to introducing MC. This study was…
Bishai, D, Colchero, A and Durack, DT	The cost effectiveness of antiretroviral treatment strategies in resource-limited settings	Aids	2007	21	1333-40			BACKGROUND: Optimal resource allocation for antiretroviral treatment (ART) in developing countries requires assessment of different strategies for drug treatment and laboratory monitoring.;OBJECTIVES: To compare costs and outcomes for 10 000 simulated HIV-infected patients followed every 6 months for 10 years in a limited-resource setting.;METHOD: Five nested strategies, with and without the avai…
Bishai, D, Johns, B, Nair, D, Nabyonga-Orem, J, Fiona-Makmot, B, Simons, E and Dabbagh, A	The cost-effectiveness of supplementary immunization activities for measles: a stochastic model for Uganda	Journal of Infectious Diseases	2011	204 Suppl 1	S107-15			Supplemental Immunization Activities (SIAs) have become an important adjunct to measles control efforts in countries that endeavor to achieve higher levels of population immunity than can be achieved in a growing routine immunization system. Because SIAs are often supported with funds that have alternative uses, decision makers need to know how cost-effective they are compared with other options.…
Bisoffi, Z, Sirima, SB, Meheus, F, Lodesani, C, Gobbi, F, Angheben, A, Tinto, H, Neya, B, Van den Ende, K, Romeo, A and Van den Ende, J	Strict adherence to malaria rapid test results might lead to a neglect of other dangerous diseases: a cost benefit analysis from Burkina Faso	Malaria Journal	2011	10	226			BACKGROUND: Malaria rapid diagnostic tests (RDTs) have generally been found reliable and cost-effective. In Burkina Faso, the adherence of prescribers to the negative test result was found to be poor. Moreover, the test accuracy for malaria-attributable fever (MAF) is not the same as for malaria infection. This paper aims at determining the costs and benefits of two competing strategies for the m…
Blake, IM, Burton, MJ, Solomon, AW, West, SK, Basanez, MG, Gambhir, M, Bailey, RL, Mabey, DC and Grassly, NC	Targeting antibiotics to households for trachoma control	PLoS Neglected Tropical Diseases [electronic resource]	2010	4	e862			BACKGROUND: Mass drug administration (MDA) is part of the current trachoma control strategy, but it can be costly and results in many uninfected individuals receiving treatment. Here we explore whether alternative, targeted approaches are effective antibiotic-sparing strategies.;METHODOLOGY/PRINCIPAL FINDINGS: We analysed data on the prevalence of ocular infection with Chlamydia trachomatis and o…
Blandford, JM, Gift, TL, Vasaikar, S, Mwesigwa-Kayongo, D, Dlali, P and Bronzan, RN	Cost-effectiveness of on-site antenatal screening to prevent congenital syphilis in rural eastern Cape Province, Republic of South Africa	Sexually Transmitted Diseases	2007	34	S61-6			OBJECTIVES: On-site screening and same-day treatment of maternal syphilis in underresourced settings can avert greater numbers of congenital syphilis cases, but health outcomes and associated costs must be evaluated jointly.;METHODS: We used decision analysis to estimate the incremental cost-effectiveness of two on-site antenatal syphilis screening strategies to avert congenital infections-qualit…
Blower, S, Ma, L, Farmer, P and Koenig, S	Predicting the impact of antiretrovirals in resource-poor settings: preventing HIV infections whilst controlling drug resistance	Current Drug Targets - Infectious Disorders	2003	3	345-53			There is currently an opportunity to carefully plan the implementation of antiretroviral (ARV) therapy in the developing world. Here, we use mathematical models to predict the potential impact that low to moderate usage rates of ARVs might have in developing countries. We use our models to predict the relationship between the specific usage rate of ARVs (in terms of the percentage of those infect…
Boccia, TMQR, Burattini, MN, Coutinho, FAB and Massad, E	Will people change their vector-control practices in the presence of an imperfect dengue vaccine?	Epidemiology and Infection	2014	142	625-633			Human behaviours, which are influenced by social, cultural, economic and political factors, can increase or decrease the risk of dengue infection, depending on the relationship with the insect vector. Because no vaccine is currently available, the spread of dengue can only be curtailed by controlling vector populations (Aedes aegypti and others) and by protecting individuals. This study tested th…
Bogard, E and Kuntz, KM	The impact of a partially effective HIV vaccine on a population of intravenous drug users in Bangkok, Thailand: a dynamic model	Journal of Acquired Immune Deficiency Syndromes: JAIDS	2002	29	132-41			Because of the variability of HIV, the first AIDS vaccine is likely to be only partially effective. There is some concern among scientists that a low-efficacy vaccine could worsen the HIV epidemic if vaccinated individuals increase their risk behavior under the false assumption of immunity. To address this concern, we constructed a dynamic compartmental model that simulated the course of the HIV/…
Boily, MC, Desai, K, Masse, B and Gumel, A	Incremental role of male circumcision on a generalised HIV epidemic through its protective effect against other sexually transmitted infections: From efficacy to effectiveness to population-level impact	Sexually Transmitted Infections	2008	84	ii28-ii34			Background: Male circumcision (MC) can reduce HIV acquisition. However, a better understanding of the indirect protective effect of MC on sexually transmitted infections (STIs) is required. Objective: To assess the incremental benefits conferred by MC on HIV infection at the individual level in circumcision trials (no herd immunity effect) and at the population level (with herd immunity effect) o…
Bollinger, LA, Stover, J, Musuka, G, Fidzani, B, Moeti, T and Busang, L	The cost and impact of male circumcision on HIV/AIDS in Botswana	J Int AIDS Soc	2009	12	7			The HIV/AIDS epidemic continues to be a major issue facing Botswana, with overall adult HIV prevalence estimated to be 25.7 percent in 2007. This paper estimates the cost and impact of the draft Ministry of Health male circumcision strategy using the UNAIDS/WHO Decision-Makers' Programme Planning Tool (DMPPT). Demographic data and HIV prevalence estimates from the recent National AIDS Coordinatin…
Bolton, KJ, McCaw, JM, Moss, R, Morris, RS, Wang, S, Burma, A, Darma, B, Narangerel, D, Nymadawa, P and McVernon, J	Likely effectiveness of pharmaceutical and non-pharmaceutical interventions for mitigating influenza virus transmission in Mongolia	Bulletin of the World Health Organization	2012	90	264-71			OBJECTIVE: To assess the likely benefit of the interventions under consideration for use in Mongolia during future influenza pandemics.;METHODS: A stochastic, compartmental patch model of susceptibility, exposure, infection and recovery was constructed to capture the key effects of several interventions--travel restrictions, school closure, generalized social distancing, quarantining of close con…
Bonnet, M, Tajahmady, A, Hepple, P, Ramsay, A, Githui, W, Gagdnidze, L, Gu√©rin, PJ and Varaine, F	Added value of bleach sedimentation microscopy for diagnosis of tuberculosis: A cost-effectiveness study	International Journal of Tuberculosis and Lung Disease	2010	14	571-577			SETTING: Bleach sedimentation is a method used to increase the diagnostic yield of sputum microscopy for countries with a high prevalence of human immunodefi-ciency virus (HIV) infection and limited resources. OBJECTIVES: To compare the relative cost-effectiveness of different microscopy approaches in diagnosing tuberculosis (TB) in Kenya. METHODS: An analytical decision tree model including cost…
Borghi, J, Fox-Rushby, J, Bergel, E, Abalos, E, Hutton, G and Carroli, G	The cost-effectiveness of routine versus restrictive episiotomy in Argentina	American Journal of Obstetrics & Gynecology	2002	186	221-8			OBJECTIVE: This article provides the estimates of the cost implications of switching from routine to restrictive episiotomy in 2 provinces in Argentina (Santa Fe and Salta) from the viewpoint of the health provider.;STUDY DESIGN: A decision-tree model was constructed that used the probabilities and patient outcomes (the results of a trial in Argentina), resource use, cost, and local epidemiologic…
Bos, JM and Postma, MJ	The economics of HIV vaccines: projecting the impact of HIV vaccination of infants in sub-Saharan Africa	Pharmacoeconomics	2001	19	937-46			OBJECTIVES: (i) To project vaccine parameters, economic consequences and market size associated with HIV-1 vaccination of infants in sub-Saharan Africa through the Expanded Program on Immunisation (EPI); and (ii) to assess threshold values for price and effectiveness.;STUDY DESIGN AND METHODS: Cost-effectiveness analysis using a decision-analysis model linking epidemiological data with economic i…
Bottomley, C, Roca, A, Hill, PC, Greenwood, B and Isham, V	A mathematical model of serotype replacement in pneumococcal carriage following vaccination	Journal of the Royal Society Interface	2013	10	20130786			A number of childhood vaccination programmes have recently introduced vaccination against Streptococcus pneumoniae, the pneumococcus, a major cause of pneumonia and meningitis. The pneumococcal conjugate vaccines (PCVs) that are currently in use only protect against some serotypes of the bacterium, and there is now strong evidence that those serotypes not included in the vaccine increase in preva…
Boulle, A, Kenyon, C, Skordis, J and Wood, R	Exploring the costs of a limited public sector antiretroviral treatment programme in South Africa	South African Medical Journal	2002	92	811-7			BACKGROUND: The role of antiretroviral treatment for adults in the pubic sector in South Africa is debated with little consideration of programme choices that could impact on the cost-effectiveness of the intervention. This study seeks to explore the impact of these programme choices at an individual level, as well as explore the total cost of a rationed national public sector antiretroviral trea…
Bowden, FJ and Garnett, GP	Trichomonas vaginalis epidemiology: parameterising and analysing a model of treatment interventions	Sexually Transmitted Infections	2000	76	248-56			BACKGROUND: Trichomonas vaginalis, which affects at least 170 million individuals globally, may increase the risk of transmission of HIV and predispose pregnant women to premature rupture of membranes and early labour.;OBJECTIVE: To more clearly define the epidemiology of trichomoniasis and to develop a mathematical model of disease transmission dynamics in order to explore various treatment stra…
Bracher, M, Santow, G and Watkins, SC	Assessing the potential of condom use to prevent the spread of HIV: a microsimulation study	Studies in Family Planning	2004	35	48-64			In this study, a microsimulation model is used to assess the potential impact of condom use on women's lifetime risk of acquiring HIV in rural southern Malawi. The model draws on survey data for information on sexual activity, marriage and divorce, and on the biomedical literature for input parameters governing the transmission and spread of HIV and other sexually transmitted diseases (STDs). We …
Bradley, BD, Qu, S, Peel, D, Howie, SRC and Cheng, YL	Storing oxygen or storing energy? A cost-effectiveness model for comparing appropriate medical oxygen supply systems in low-resource health facilities with intermittent power	7th International Conference on Appropriate Healthcare Technologies for Developing Countries, September 18, 2012 - September 19, 2012	2012	2012		London, United kingdom	Institution of Engineering and Technology	A model is presented for comparing the cost-effectiveness of different oxygen technology systems specifically designed for health centres with intermittent power. We compare the options of storing energy in batteries vs. storing oxygen generated when energy is available. Conceptual oxygen storage system designs are presented. The model takes into account hours of grid power per day, oxygen demand…
Braithwaite, RS, Nucifora, KA, Kessler, J, Toohey, C, Mentor, SM, Uhler, LM, Roberts, MS and Bryant, K	Impact of Interventions Targeting Unhealthy Alcohol Use in Kenya on HIV Transmission and AIDS-Related Deaths	Alcoholism: Clinical and Experimental Research	2014	38	1059-1067			Background: HIV remains a major cause of preventable morbidity and mortality in Kenya. The effects of behaviors that accompany unhealthy alcohol consumption are a pervasive risk factor for HIV transmission and progression. Our objective was to estimate the portion of HIV infections attributable to unhealthy alcohol use and to evaluate the impact of hypothetical interventions directed at unhealthy…
Braithwaite, RS, Nucifora, KA, Yiannoutsos, CT, Musick, B, Kimaiyo, S, Diero, L, Bacon, MC and Wools-Kaloustian, K	Alternative antiretroviral monitoring strategies for HIV-infected patients in east Africa: opportunities to save more lives?	Journal of the International AIDS Society	2011	14	38			BACKGROUND: Updated World Health Organization guidelines have amplified debate about how resource constraints should impact monitoring strategies for HIV-infected persons on combination antiretroviral therapy (cART). We estimated the incremental benefit and cost effectiveness of alternative monitoring strategies for east Africans with known HIV infection.;METHODS: Using a validated HIV computer s…
Brooks, A, Briet, OJT, Hardy, D, Steketee, R and Smith, TA	Simulated Impact of RTS,S/AS01 Vaccination Programs in the Context of Changing Malaria Transmission	Plos One	2012	7	12			Introduction: The RTS, S/AS01 pre-erythrocytic malaria vaccine is in phase III clinical trials. It is critical to anticipate where and how it should be implemented if trials are successful. Such planning may be complicated by changing levels of malaria transmission. Methods/results: Computer simulations were used to examine RTS, S/AS01 impact, using a vaccine profile based on phase II trial resul…
Broughton, EI	Economic evaluation of Haemophilus influenzae type B vaccination in Indonesia: a cost-effectiveness analysis	Journal of Public Health	2007	29	441-8			BACKGROUND: Haemophilus influenzae type B (Hib) causes significant morbidity and mortality in children under five years of age. A safe and effective vaccine is available but is not in general use in developing countries. This paper evaluates the cost-effectiveness of introducing Hib vaccine in Indonesia as an addition to the country's current DTP-Hepatitis B vaccination program.;METHODS: The econ…
Buonomo, B	A simple analysis of vaccination strategies for rubella	Mathematical Biosciences & Engineering: MBE	2011	8	677-87			We consider an SEIR epidemic model with vertical transmission introduced by Li, Smith and Wang, [23], and apply optimal control theory to assess the effects of vaccination strategies on the model dynamics. The strategy is chosen to minimize the total number of infectious individuals and the cost associated with vaccination. We derive the optimality system and solve it numerically. The theoretical…
Burgos, JL, Kahn, JG, Strathdee, SA, Valencia-Mendoza, A, Bautista-Arredondo, S, Laniado-Laborin, R, Casta√±eda, Deiss, R and Garfein, RS	Targeted screening and treatment for latent tuberculosis infection using QuantiFERON¬Æ-TB Gold is cost-effective in Mexico	International Journal of Tuberculosis and Lung Disease	2009	13	962-968			OBJECTIVE: To assess the cost-effectiveness of screening for latent tuberculosis infection (LTBI) using a commercially available detection test and treating individuals at high risk for human immunodeficiency virus (HIV) infection in a middle-income country. DESIGN: We developed a Markov model to evaluate the cost per LTBI case detected, TB case averted and quality-adjusted life year (QALY) gaine…
Burke, MJ, Shenton, RC and Taylor, MJ	The economics of screening infants at risk of hearing impairment: an international analysis	International Journal of Pediatric Otorhinolaryngology	2012	76	212-8			OBJECTIVE: Hearing impairment in children across the world constitutes a particularly serious obstacle to their optimal development and education, including language acquisition. Around 0.5-6 in every 1000 neonates and infants have congenital or early childhood onset sensorineural deafness or severe-to-profound hearing impairment, with significant consequences. Therefore, early detection is a vit…
Campos, NG, Kim, JJ, Castle, PE, Ortendahl, JD, O'Shea, M, Diaz, M and Goldie, SJ	Health and economic impact of HPV 16/18 vaccination and cervical cancer screening in Eastern Africa	International Journal of Cancer	2012	130	2672-84			Eastern Africa has the world's highest cervical cancer incidence and mortality rates. We used epidemiologic data from Kenya, Mozambique, Tanzania, Uganda, and Zimbabwe to develop models of HPV-related infection and disease. For each country, we assessed HPV vaccination of girls before age 12 followed by screening with HPV DNA testing once, twice, or three times per lifetime (at ages 35, 40, 45). …
Canfell, K, Shi, JF, Lew, JB, Walker, R, Zhao, FH, Simonella, L, Chen, JF, Legood, R, Smith, MA, Nickson, C and Qiao, YL	Prevention of cervical cancer in rural China: evaluation of HPV vaccination and primary HPV screening strategies	Vaccine	2011	29	2487-94			Comprehensive evaluation of the cost-effectiveness of HPV vaccination in China has not previously been performed. The objective of this study was to evaluate vaccination as an alternative or addition to primary HPV screening with careHPV (Qiagen, Gaithersburg, USA), and to assess the threshold total cost per vaccinated girl (CVG) at which strategies involving vaccination would become viable compa…
Cao, H and Huang, S	Principles of scarce medical resource allocation in natural disaster relief: a simulation approach	Medical Decision Making	2012	32	470-6			BACKGROUND: A variety of triage principles have been proposed. The authors sought to evaluate their effects on how many lives can be saved in a hypothetical disaster.;OBJECTIVE: To determine an optimal scarce resource-rationing principle in the emergency response domain, considering the trade-off between lifesaving efficiency and ethical issues.;METHOD: A discrete event simulation model is develo…
Cao, LS, Zhang, YB, Chang, C and Deng, DX	Evaluation model of the lay-out of sickbeds that based on the overall satisfaction	2010 IEEE International Conference on Advanced Computer Control, ICACC 2010	2010	4	307-311			By analyzing the factors which have impact on how the hospital arrange its sickbeds, this paper gives a evaluation index system about arranging the sickbeds and a evaluation model that based on the overall satisfaction of the patients and the hospital. From the perspective of patients, we consider their time, cost and the therapeutic effect, while from the viewpoint of the hospital, the analysis …
Caporale, JE, Elgart, J, Pfirter, G, Martinez, P, Vines, G, Insua, JT and Gagliardino, JJ	Hospitalization costs for heart failure in people with type 2 diabetes: cost-effectiveness of its prevention measured by a simulated preventive treatment	Value in Health	2011	14	S20-3			OBJECTIVES: To estimate the cost-consequence of interventions to prevent hospitalizations for heart failure (HF) in people with type 2 diabetes.;METHODS: In HF events (63) from type 2 diabetes-related hospitalizations (N = 462) recorded in an Argentine hospital (March 2004-April 2005), we verified 1) the presence of one metabolic HF predictor (glycosylated hemoglobin [HbA1c] value) before hospita…
Carabin, H, Chan, MS and Guyatt, HL	A population dynamic approach to evaluating the impact of school attendance on the unit cost and effectiveness of school-based schistosomiasis chemotherapy programmes	Parasitology	2000	121	171-83			This paper presents a first attempt at modelling the possible cost and effectiveness of reaching non-enrolled children through school-based programmes using empirical data from Egypt. A sex/school-attendance/age-structured population dynamic model was used to predict trends in infection and early disease. Four treatment delivery strategies were compared: school-based (coverage of 85 %) and school…
Carlos, F, Ramirez-Gamez, J, Duenas, H, Galindo-Suarez, RM and Ramos, E	Economic evaluation of duloxetine as a first-line treatment for painful diabetic peripheral neuropathy in Mexico	Journal of Medical Economics	2012	15	233-44			OBJECTIVE: To perform an economic evaluation of duloxetine, pregabalin, and both branded and generic gabapentin for managing pain in patients with painful diabetic peripheral neuropathy (PDPN) in Mexico.;RESEARCH DESIGN AND METHODS: The analysis was conducted using a 3-month decision model, which compares duloxetine 60mg once daily (DUL), pregabalin 150mg twice daily (PGB), and gabapentin 600mg t…
Carneiro, I, Smith, L, Ross, A, Roca-Feltrer, A, Greenwood, B, Schellenberg, JA, Smith, T and Schellenberg, D	Intermittent preventive treatment for malaria in infants: a decision-support tool for sub-Saharan Africa	Bulletin of the World Health Organization	2010	88	807-14			OBJECTIVE: To develop a decision-support tool to help policy-makers in sub-Saharan Africa assess whether intermittent preventive treatment in infants (IPTi) would be effective for local malaria control.;METHODS: An algorithm for predicting the effect of IPTi was developed using two approaches. First, study data on the age patterns of clinical cases of Plasmodium falciparum malaria, hospital admis…
Carrasco, LR, Lee, VJ, Chen, MI, Matchar, DB, Thompson, JP and Cook, AR	Strategies for antiviral stockpiling for future influenza pandemics: A global epidemic-economic perspective	Journal of the Royal Society Interface	2011	8	1307-1313			Influenza pandemics present a global threat owing to their potential mortality and substantial economic impacts. Stockpiling antiviral drugs to manage a pandemic is an effective strategy to offset their negative impacts; however, little is known about the long-term optimal size of the stockpile under uncertainty and the characteristics of different countries. Using an epidemic-economic model we s…
Carrera, C, Azrack, A, Begkoyian, G, Pfaffmann, J, Ribaira, E, O'Connell, T, Doughty, P, Aung, KM, Prieto, L, Rasanathan, K, Sharkey, A, Chopra, M, Knippenberg, R, Unicef Equity in Child Survival, H and Nutrition Analysis, T	The comparative cost-effectiveness of an equity-focused approach to child survival, health, and nutrition: a modelling approach	Lancet	2012	380	1341-51			Progress on child mortality and undernutrition has seen widening inequities and a concentration of child deaths and undernutrition in the most deprived communities, threatening the achievement of the Millennium Development Goals. Conversely, a series of recent process and technological innovations have provided effective and efficient options to reach the most deprived populations. These trends r…
Carvalho, N, Salehi, AS and Goldie, SJ	National and sub-national analysis of the health benefits and cost-effectiveness of strategies to reduce maternal mortality in Afghanistan	Health Policy & Planning	2013	28	62-74			BACKGROUND: Afghanistan has one of the highest rates of maternal mortality in the world. We assess the health outcomes and cost-effectiveness of strategies to improve the safety of pregnancy and childbirth in Afghanistan.;METHODS: Using national and sub-national data, we adapted a previously validated model that simulates the natural history of pregnancy and pregnancy-related complications. We in…
Cassels, S, Pearson, CR, Kurth, AE, Martin, DP, Simoni, JM, Matediana, E and Gloyd, S	Discussion and revision of the mathematical modeling tool described in the previously published article "Modeling HIV Transmission risk among Mozambicans prior to their initiating highly active antiretroviral therapy"	AIDS Care	2009	21	858-62			Mathematical models are increasingly used in social and behavioral studies of HIV transmission; however, model structures must be chosen carefully to best answer the question at hand and conclusions must be interpreted cautiously. In Pearson et al. (2007), we presented a simple analytically tractable deterministic model to estimate the number of secondary HIV infections stemming from a population…
Castaneda-Orjuela, C, Alvis-Guzman, N, Paternina, AJ and De la Hoz-Restrepo, F	Cost-effectiveness of the introduction of the pneumococcal polysaccharide vaccine in elderly Colombian population	Vaccine	2011	29	7644-50			BACKGROUND: Streptococcus pneumoniae causes community-acquired pneumonia, otitis media and meningitis, with higher incidences at the extremes of life. PPV-23 vaccine is widely used in prevention of pneumonia and invasive pneumococcal disease in older adults in developed countries. We developed an evaluation of cost-effectiveness of implementing PPV-23 in Colombian population over 60 years.;METHOD…
Castaneda-Orjuela, C, Alvis-Guzman, N, Velandia-Gonzalez, M and De la Hoz-Restrepo, F	Cost-effectiveness of pneumococcal conjugate vaccines of 7, 10, and 13 valences in Colombian children	Vaccine	2012	30	1936-43			BACKGROUND: Currently there are three pneumococcal conjugate vaccines with different coverage of serotypes for use in children under one year. We evaluate the cost-effectiveness of the introduction of pneumococcal conjugate vaccines of 7, 10, and 13 valences in the Colombian EPI.;METHODS: A Markov model, which followed a cohort of children under one year to life expectancy, was developed. Paramet…
Castaneda-Orjuela, C, Romero, M, Arce, P, Resch, S, Janusz, CB, Toscano, CM and De la Hoz-Restrepo, F	Using standardized tools to improve immunization costing data for program planning: the cost of the Colombian Expanded Program on Immunization	Vaccine	2013	31 Suppl 3	C72-9			INTRODUCTION: The cost of Expanded Programs on Immunization (EPI) is an important aspect of the economic and financial analysis needed for planning purposes. Costs also are needed for cost-effectiveness analysis of introducing new vaccines. We describe a costing tool that improves the speed, accuracy, and availability of EPI costs and that was piloted in Colombia.;METHODS: The ProVac CostVac Tool…
Castillo-Riquelme, M, Chalabi, Z, Lord, J, Guhl, F, Campbell-Lendrum, D, Davies, C and Fox-Rushby, J	Modelling geographic variation in the cost-effectiveness of control policies for infectious vector diseases: The example of Chagas disease	Journal of Health Economics	2008	27	405-426			Few cost-effectiveness analysis (CEA) models have accounted for geographic variation in input parameters. This paper describes a deterministic discrete-time multi-state model to estimate the cost-effectiveness of vector control policies for Chagas disease, where implementation varies according to village characteristics. The model outputs include the total number of new infections, disability adj…
Castro-Jaramillo, HE	The cost-effectiveness of enzyme replacement therapy (ERT) for the infantile form of Pompe disease: Comparing a high-income country's approach (England) to that of a middleincome one (Colombia)	Revista de Salud Publica	2012	14	143-155			Objectives Determining the cost-effectiveness of enzyme replacement therapy (ERT) for the classical infantile form of Pompe disease (complete acid Œ±-glucosidase deficiency-related) in two different settings: England and Colombia. Pompe disease is very rare (1:40,000 births incidence). Methods A literature review was made and historic databases searched for National Health Service (NHS) reimburse…
Cavaljuga, S, Cavaljuga, M and Cavaljuga, M	Use of mathematical modeling in predicting the impact of a disease: An example of measles dynamic model	HealthMED	2009	3	17-23			Protecting children from vaccine-preventable diseases, such as measles, is among primary goals of public health professionals worldwide. Since vaccination turned out to be the most effective strategy against major childhood diseases, developing a mathematical model that would predict an optimal vaccine coverage level needed to control the spread of these diseases becomes a challenge for various e…
Cecchini, M, Sassi, F, Lauer, JA, Lee, YY, Guajardo-Barron, V and Chisholm, D	Tackling of unhealthy diets, physical inactivity, and obesity: health effects and cost-effectiveness	Lancet	2010	376	1775-84			The obesity epidemic is spreading to low-income and middle-income countries as a result of new dietary habits and sedentary ways of life, fuelling chronic diseases and premature mortality. In this report we present an assessment of public health strategies designed to tackle behavioural risk factors for chronic diseases that are closely linked with obesity, including aspects of diet and physical …
Chaib, E, de Oliveira, MCF, Galvao, FHF, Silva, FD, D'Albuquerque, LAC and Massad, E	Theoretical impact of an anti-HCV vaccine on the annual number of liver transplantation	Medical Hypotheses	2010	75	324-327			The development of an effective vaccine for hepatitis C is of paramount importance, given the global disease burden and its public health impact. We simulated a theoretical vaccine with 98% efficacy and coverage of 95% of the susceptible population, an achievable program. The simulated period of vaccination varied from 0 to 70 years and we calculated, through a mathematical model, the reduction i…
Chaib, E and Massad, E	The potential impact of using donations after cardiac death on the liver transplantation program and waiting list in the State of Sao Paulo, Brazil	Liver Transplantation	2008	14	1732-1736			Liver transplantation was first performed at the University of Sao Paulo School of Medicine in 1968. Since then, the patient waiting list for liver transplantation has increased at a rate of 150 new cases per month. Liver transplantation itself rose 1.84-fold (from 160 to 295) from 1988 to 2004. However, the number of patients on the liver waiting list jumped 2.71-fold (from 553 to 1500). Consequ…
Champunot, R, Thawitsri, T, Kamsawang, N, Sirichote, V and Nopmaneejumruslers, C	Cost effectiveness analysis of an initial ICU admission as compared to a delayed ICU admission in patients with severe sepsis or in septic shock	Journal of the Medical Association of Thailand	2014	97 Suppl 1	S102-7			OBJECTIVE: To assess the cost effectiveness of an initial ICU admissionforpatients with severe sepsis or those in septic shock following the initial resuscitation in the emergency department.;MATERIAL AND METHOD: Mortality data was generated through retrospective data obtained from 1,048 adult patients with severe sepsis or in septic shock from one tertiary care and eight community hospitals in P…
Chao, DL, Halloran, ME and Longini, IM, Jr.	Vaccination strategies for epidemic cholera in Haiti with implications for the developing world	Proceedings of the National Academy of Sciences of the United States of America	2011	108	7081-5			In October 2010, a virulent South Asian strain of El Tor cholera began to spread in Haiti. Interventions have included treatment of cases and improved sanitation. Use of cholera vaccines would likely have further reduced morbidity and mortality, but such vaccines are in short supply and little is known about effective vaccination strategies for epidemic cholera. We use a mathematical cholera tran…
Chao, DL, Halstead, SB, Halloran, ME and Longini, IM, Jr.	Controlling dengue with vaccines in Thailand	PLoS Neglected Tropical Diseases [electronic resource]	2012	6	e1876			BACKGROUND: Dengue is a mosquito-borne infectious disease that constitutes a growing global threat with the habitat expansion of its vectors Aedes aegyti and A. albopictus and increasing urbanization. With no effective treatment and limited success of vector control, dengue vaccines constitute the best control measure for the foreseeable future. With four interacting dengue serotypes, the develop…
Che, D, Zhou, H, He, J and Wu, B	Modeling the impact of the 7-valent pneumococcal conjugate vaccine in Chinese infants: An economic analysis of a compulsory vaccination	BMC Health Services Research	2014	14				Background: The purpose of this study was to compare, from a Chinese societal perspective, the projected health benefits, costs, and cost-effectiveness of adding pneumococcal conjugate heptavalent vaccine (PCV-7) to the routine compulsory child immunization schedule. Methods. A decision-tree model, with data and assumptions adapted for relevance to China, was developed to project the health outco…
Chen, BL, Li, ED, Yamawuchi, K, Kato, K, Naganawa, S and Miao, WJ	Impact of adjustment measures on reducing outpatient waiting time in a community hospital: Application of a computer simulation	Chinese Medical Journal	2010	123	574-580			Background: As an important determinant of patient satisfaction, waiting time, has gained increasing attention in the field of health care services. The present study aimed to illustrate the distribution characteristics of waiting time in a community hospital and explore the impact of potential measures to reduce outpatient waiting time based on a computer simulation approach. Methods: During a o…
Chen, QF, Wang, L, Li, YP, Yang, XY, Li, D, Wang, YH, Hou, QT and Lei, JH	Interferon-Œ≥ release assays screening for latent tuberculosis screening: A cost-effectiveness analysis	Chinese Journal of Evidence-Based Medicine	2011	11	768-774			Objective To evaluate the cost-effectiveness of three LTBI screening strategies: the tuberculin skin test (TST), the T-SPOT.TB and the combination of TST and T-SPOT (TST+T.SPOT), to provide economic evidence for T.SPOT application in China. Methods A decision analysis model evaluated three strategies among a cohort of 1000 tuberculosis (TB) close contacts, using incremental cost-effectiveness of …
Chen, SCC, Toy, M, Yeh, JM, Wang, JD and Resch, S	Cost-effectiveness of augmenting universal hepatitis B vaccination with immunoglobin treatment	Pediatrics	2013	131	e1135-e1143			OBJECTIVE: To compare the cost-effectiveness of hepatitis B virus (HBV) control strategies combining universal vaccination with hepatitis B immunoglobulin (HBIG) treatment for neonates of carrier mothers. METHODS: Drawing on Taiwan's experience, we developed a decision-analytic model to estimate the clinical and economic outcomes for 4 strategies: (1) strategy V - universal vaccination; (2) strat…
Chen, SI, Norman, BA, Rajgopal, J, Assi, TM, Lee, BY and Brown, ST	A planning model for the WHO-EPI vaccine distribution network in developing countries	IIE Transactions (Institute of Industrial Engineers)	2014	46	853-865			In many developing countries, inefficiencies in the supply chain for the World Health Organization's Expanded Program on Immunization (EPI) vaccines are of grave concern; these inefficiencies result in thousands of people not being fully immunized and creates significant risk of disease epidemics. Thus, there is a great deal of interest in these countries in building tools to analyze and optimize…
Chen, W, Jiang, Z, Shao, Z, Sun, Q and Shen, K	An economic evaluation of adjuvant trastuzumab therapy in HER2-positive early breast cancer	Value in Health	2009	12 Suppl 3	S82-4			OBJECTIVE: One-year adjuvant trastuzumab therapy increases disease-free and overall survival in the adjuvant treatment of early HER2-positive breast cancer. This study aims to assess the long-term cost-effectiveness of adjuvant trastuzumab treatment in Beijing, Shanghai, and Guangzhou.;METHODS: A Markov health-state transition model was constructed to simulate the natural development of breast ca…
Cheng, MM, Lu, B, Hu, SS, Marelli, C, Higashi, MK, Patel, PA, Li, J and Veenstra, DL	Optimizing CAD diagnosis in China with CT angiography	Journal of cardiovascular computed tomography	2009	3	153-8			BACKGROUND: Diagnosis of coronary artery disease (CAD) in China with coronary angiography (CA) can be challenging because of high disease prevalence and limited resources. Coronary computed tomography angiography (CTA) may provide an opportunity to minimize invasive diagnostic procedures among intermediate-risk patients indicated for CA and increase patient access to diagnosis of CAD in a cost-ef…
Cheng, Y-J	An MIP model for surgery scheduling in combination with surgeon shift scheduling	20th International Conference on Industrial Engineering and Engineering Management, IEEM 2013, December 10, 2013 - December 13, 2013	2013		963-971	Baotou, China	Springer-Berlin	This paper builds a model for surgery scheduling in combination with surgeon shift scheduling in order to maximize the throughput of surgery performance in the hospital operational management and balance the closing time of operating rooms. The model is based on MIP technique and the solver CPLEX is used to solve it. At last a numeric example with real data from a large general hospital in West C…
Chicaiza-Becerra, LA, Garcia-Molina, M, Gamboa, O and Castaneda-Orjuela, C	The cost-effectiveness of open or thoracoscopic thymectomy compared to medical treatment in managing Myasthenia gravis without thymomas	Revista de Salud Publica	2012	14	260-70			OBJECTIVE: Assessing the cost-effectiveness of open or thoracoscopic thymectomy compared to medical therapy in managing myasthenia gravis not associated with thymoma.;METHODS: A Markov model was designed for evaluating three strategies' cost-effectiveness. Transition probabilities were taken from the pertinent literature; the costs were estimated from official tariff manuals. Incremental cost-eff…
Chihota, VN, Grant, AD, Fielding, K, Ndibongo, B, van Zyl, A, Muirhead, D and Churchyard, GJ	Liquid vs. solid culture for tuberculosis: performance and cost in a resource-constrained setting	International Journal of Tuberculosis & Lung Disease	2010	14	1024-31			SETTING: National Health Laboratory Services tuberculosis (TB) laboratory, South Africa.;OBJECTIVES: To compare Mycobacterium Growth Indicator Tube (MGIT) with Lowenstein-Jensen (LJ) medium with regard to Mycobacterium tuberculosis yield, time to positive culture and contamination, and to assess MGIT cost-effectiveness.;DESIGN: Sputum from gold miners was cultured on MGIT and LJ. We estimated cos…
Chin-Tsai, L and Meng-Chuan, T	Evaluating the Optimal City in South China for New Medical Facilities: The Application Modified Porter's Diamond Framework	Journal of Testing and Evaluation	2010	38	JTE102555 (11 pp.)			This study presents the methods for modeling optimal city selection for new medical facilities in South China. This study has the objective of identifying the key criteria determining the relative advantages of different cities as a location for a new medical facility to help optimize the location of such facilities. The optimal city depends on various complex and interdependent criteria from the…
Chirakup, S, Chaiyakunapruk, N, Chaikledkeaw, U, Pongcharoensuk, P, Ongphiphadhanakul, B, Roze, S, Valentine, WJ and Palmer, AJ	Cost-effectiveness analysis of thiazolidinediones in uncontrolled type 2 diabetic patients receiving sulfonylureas and metformin in Thailand	Value in Health	2008	11 Suppl 1	S43-51			OBJECTIVE: The national essential drug committee in Thailand suggested that only one of thiazolidinediones be included in hospital formulary but little was know about their cost-effectiveness values. This study aims to determine an incremental cost-effectiveness ratio of pioglitazone 45 mg compared with rosiglitazone 8 mg in uncontrolled type 2 diabetic patients receiving sulfonylureas and metfor…
Chisholm, D, Gureje, O, Saldivia, S, Villalon Calderon, M, Wickremasinghe, R, Mendis, N, Ayuso-Mateos, JL and Saxena, S	Schizophrenia treatment in the developing world: an interregional and multinational cost-effectiveness analysis	Bulletin of the World Health Organization	2008	86	542-51			OBJECTIVE: Schizophrenia is a highly disabling disease and is costly to treat. We set out to establish what are the most cost-effective interventions applicable to developing regions and countries.;METHODS: Analysis was undertaken at the level of three WHO subregions spanning the Americas, Africa and South-East Asia, and subsequently in three member states (Chile, Nigeria and Sri Lanka). A state …
Chisholm, D and Saxena, S	Cost effectiveness of strategies to combat neuropsychiatric conditions in sub-Saharan Africa and South East Asia: mathematical modelling study	Bmj	2012	344	e609			OBJECTIVE: To assess the comparative costs and effects of interventions to combat five neuropsychiatric conditions (schizophrenia, bipolar disorder, depression, epilepsy, and heavy alcohol use).;DESIGN: Cost effectiveness analysis based on an epidemiological model.;SETTING: Two epidemiologically defined World Health Organization sub-regions of the world: countries in sub-Saharan Africa with very …
Chisholm, D and Who, C	Cost-effectiveness of first-line antiepileptic drug treatments in the developing world: a population-level analysis	Epilepsia	2005	46	751-9			PURPOSE: To establish the population-level costs and cost-effectiveness of first-line antiepileptic drug (AED) treatments for reducing the treatment gap in developing countries.;METHODS: A population model was applied to nine World Health Organization (WHO) developing subregions to estimate the impact of four first-line AEDs in the primary care management of (ICD-10 defined) idiopathic epilepsy a…
Chitnis, N, Schapira, A, Smith, T and Steketee, R	Comparing the Effectiveness of Malaria Vector-Control Interventions Through a Mathematical Model	American Journal of Tropical Medicine and Hygiene	2010	83	230-240			Although some malaria-control programs are beginning to combine insecticide-treated nets (ITNs) and indoor residual spraying (IRS). little is known about the effectiveness of such combinations We use a mathematical model to compare the effectiveness of ITNs and IRS with dichlorodiphenyltrichloroethane (DDT) or bendiocarb, applied singly and in combination. in an epidemiological setting based in N…
Chiyaka, C, Garira, W and Dube, S	Effects of treatment and drug resistance on the transmission dynamics of malaria in endemic areas	Theoretical Population Biology	2009	75	14-29			We present a mathematical model for malaria treatment and spread of drug resistance in an endemic population. The model considers treated humans that remain infectious for some time and partially immune humans who are also infectious to mosquitoes although their infectiousness is always less than their non immune counterparts. The model is formulated by considering delays in the latent periods in…
Chiyaka, C, Tchuenche, JM, Garira, W and Dube, S	A mathematical analysis of the effects of control strategies on the transmission dynamics of malaria	Applied Mathematics and Computation	2008	195	641-662			We formulate a deterministic model with two latent periods in the non-constant host and vector populations, in order to theoretically assess the potential impact of personal protection, treatment and possible vaccination strategies on the transmission dynamics of malaria. The thresholds and equilibria for the model are determined. The model is analysed qualitatively to determine criteria for cont…
Cho Min, N and Saul, A	Treatment of uncomplicated Plasmodium falciparum malaria in Myanmar: a clinical decision analysis	Southeast Asian Journal of Tropical Medicine & Public Health	2000	31	238-45			This study was undertaken to compare cost-effectiveness of three drug regimes for treatment of uncomplicated falciparum malaria in Myanmar. The alternative regimens in this study were chloroquine (CQ), sulphadoxine-pyrimethamine (SP) and mefloquine (MFQ) along with their therapeutic efficacy in Myanmar. The study was performed by modeling a clinical decision tree based on a hypothetical 1,000 adu…
Choosakulchart, P, Kittisopee, T, Takdhada, S, Lubell, Y and Robinson, J	Cost-utility evaluation of influenza vaccination in patients with existing coronary heart diseases in Thailand	Asian Biomedicine	2013	7	425-435			Background: Influenza can exacerbate chronic coronary heart diseases (CHD) and health policy recommends influenza vaccination in this population group. However, cost effectiveness of influenza vaccination in protecting CHD population has not been, to our knowledge, well studied before especially in CHD patients with different disease severities. Objectives: To assess life-time cost utility of inf…
Chopra, M, Daviaud, E, Pattinson, R, Fonn, S and Lawn, JE	Saving the lives of South Africa's mothers, babies, and children: can the health system deliver?	Lancet	2009	374	835-46			South Africa is one of only 12 countries in which mortality rates for children have increased since the baseline for the Millennium Development Goals (MDGs) in 1990. Continuing poverty and the HIV/AIDS epidemic are important factors. Additionally, suboptimum implementation of high-impact interventions limits programme effectiveness; between a quarter and half of maternal, neonatal, and child deat…
Ciaranello, AL, Lockman, S, Freedberg, KA, Hughes, M, Chu, J, Currier, J, Wood, R, Holmes, CB, Pillay, S, Conradie, F, McIntyre, J, Losina, E, Walensky, RP, International, C and Investigators, O	First-line antiretroviral therapy after single-dose nevirapine exposure in South Africa: a cost-effectiveness analysis of the OCTANE trial	Aids	2011	25	479-92			BACKGROUND: The OCTANE trial reports superior outcomes of lopinavir/ritonavir vs. nevirapine-based antiretroviral therapy (ART) among women previously exposed to single-dose nevirapine to prevent mother-to-child HIV transmission. However, lopinavir/ritonavir is 12 times costlier than nevirapine.;METHODS: We used a computer model, with OCTANE and local data, to simulate HIV-infected, single-dose n…
Ciaranello, AL, Perez, F, Engelsmann, B, Walensky, RP, Mushavi, A, Rusibamayila, A, Keatinge, J, Park, JE, Maruva, M, Cerda, R, Wood, R, Dabis, F and Freedberg, KA	Cost-effectiveness of World Health Organization 2010 guidelines for prevention of mother-to-child HIV transmission in Zimbabwe	Clinical Infectious Diseases	2013	56	430-46			BACKGROUND: In 2010, the World Health Organization (WHO) released revised guidelines for prevention of mother-to-child human immunodeficiency virus (HIV) transmission (PMTCT). We projected clinical impacts, costs, and cost-effectiveness of WHO-recommended PMTCT strategies in Zimbabwe.;METHODS: We used Zimbabwean data in a validated computer model to simulate a cohort of pregnant, HIV-infected wom…
Ciaranello, AL, Perez, F, Keatinge, J, Park, JE, Engelsmann, B, Maruva, M, Walensky, RP, Dabis, F, Chu, J, Rusibamayila, A, Mushavi, A and Freedberg, KA	What will it take to eliminate pediatric HIV? Reaching WHO target rates of mother-to-child HIV transmission in Zimbabwe: a model-based analysis	PLoS Medicine / Public Library of Science	2012	9	e1001156			BACKGROUND: The World Health Organization (WHO) has called for the "virtual elimination" of pediatric HIV: a mother-to-child HIV transmission (MTCT) risk of less than 5%. We investigated uptake of prevention of MTCT (PMTCT) services, infant feeding recommendations, and specific drug regimens necessary to achieve this goal in Zimbabwe.;METHODS AND FINDINGS: We used a computer model to simulate a c…
Ciaranello, AL, Seage Iii, GR, Freedberg, KA, Weinstein, MC, Lockman, S and Walensky, RP	Antiretroviral drugs for preventing mother-to-child transmission of HIV in sub-Saharan Africa: Balancing efficacy and infant toxicity	AIDS	2008	22	2359-2369			Objective: Antiretroviral drugs can prevent mother-to-child transmission of HIV infection, but in-utero antiretroviral exposure may be associated with neurologic symptoms due to mitochondrial toxicity. We sought to identify the currently recommended regimen to prevent mother-to-child transmission that optimally balances risks of pediatric HIV infection and neurologic mitochondrial toxicity. Desig…
Clark, A, Jauregui, B, Griffiths, U, Janusz, CB, Bolanos-Sierra, B, Hajjeh, R, Andrus, JK and Sanderson, C	TRIVAC decision-support model for evaluating the cost-effectiveness of Haemophilus influenzae type b, pneumococcal and rotavirus vaccination	Vaccine	2013	31	C19-C29			The TRIVAC decision support model has been used widely in Latin America and other regions to help national teams evaluate the cost-effectiveness of Haemophilus influenzae type b (Hib) vaccine, pneumococcal conjugate vaccine (PCV) and rotavirus vaccine (RV). We describe the structure and functioning of this model, and identify the parameters with the greatest influence on the results. The TRIVAC m…
Clark, AD, Griffiths, UK, Abbas, SS, Rao, KD, Privor-Dumm, L, Hajjeh, R, Johnson, H, Sanderson, C and Santosham, M	Impact and cost-effectiveness of Haemophilus influenzae type b conjugate vaccination in India	Journal of Pediatrics	2013	163	S60-72			OBJECTIVE: To estimate the potential health impact and cost-effectiveness of nationwide Haemophilus influenzae type b (Hib) vaccination in India.;STUDY DESIGN: A decision support model was used, bringing together estimates of demography, epidemiology, Hib vaccine effectiveness, Hib vaccine costs, and health care costs. Scenarios favorable and unfavorable to the vaccine were evaluated. State-level…
Clark, AD, Walker, DG, Rocio Mosqueira, N, Penny, ME, Lanata, CF, Fox-Rushby, J and Sanderson, CFB	Cost-effectiveness of rotavirus vaccination in peru	Journal of Infectious Diseases	2009	200	S114-S124			Background. There are plans to introduce the oral rotavirus vaccine Rotarix (GlaxoSmithKline), 1 of 2 recently developed vaccines against rotavirus, in Peru. Methods. We modeled the cost-effectiveness of adding a rotavirus vaccine to the Peruvian immunization program under 3 scenarios for the timing of vaccination: (1) strictly according to schedule, at 2 and 4 months of age (on time); (2) distri…
Cleary, S, Mooney, G and McIntyre, D	Equity and efficiency in HIV-treatment in South Africa: the contribution of mathematical programming to priority setting	Health Economics	2010	19	1166-80			The HIV-epidemic is one of the greatest public health crises to face South Africa. A health care response to the treatment needs of HIV-positive people is a prime example of the desirability of an economic, rational approach to resource allocation in the face of scarcity. Despite this, almost no input based on economic analysis is currently used in national strategic planning. While cost-utility …
Cleary, SM, McIntyre, D and Boulle, AM	Assessing efficiency and costs of scaling up HIV treatment	Aids	2008	22 Suppl 1	S35-42			INTRODUCTION: Whereas cost-effectiveness/utility analyses theoretically assess efficiency in HIV treatment, in practice they are of limited use to policy makers who are also concerned with the total costs of scaling up. This paper proposes an approach to simultaneously assessing both factors when setting priorities for HIV treatment.;METHODS: Three interventions were assessed: a no antiretroviral…
Cocking, C, Flessa, S and Reinelt, G	Locating Health Facilities in Nouna District, Burkina Faso	Operations Research Proceedings 2005	2005	2005	431-436		Springer Berlin Heidelberg	The Nouna health district in Burkina Faso, Africa, has a population of approximately 275,000 people living in 290 villages, who are served by 23 health facilities. At present, the time and effort required in travelling to a health facility (especially during the rainy season) is, for many people, a deterrent to seeking proper medical care. As one step toward improving health care for the people i…
Codeco, CT, Luz, PM, Coelho, F, Galvani, AP and Struchiner, C	Vaccinating in disease-free regions: a vaccine model with application to yellow fever	Journal of the Royal Society Interface	2007	4	1119-1125			Concerns regarding natural or induced emergence of infectious diseases have raised a debate on the pros and cons of pre-emptive vaccination of populations under uncertain risk. In the absence of immediate risk, ethical issues arise because even smaller risks associated with the vaccine are greater than the immediate disease risk (which is zero). The model proposed here seeks to formalize the vacc…
Coelli, FC, Almeida, RMVR and Pereira, WCA	A cost simulation for mammography examinations taking into account equipment failures and resource utilization characteristics	Journal of Evaluation in Clinical Practice	2010	16	1198-1202			Objective This work develops a cost analysis estimation for a mammography clinic, taking into account resource utilization and equipment failure rates. Materials and methods Two standard clinic models were simulated, the first with one mammography equipment, two technicians and one doctor, and the second (based on an actually functioning clinic) with two equipments, three technicians and one doct…
Coelli, FC, Ferreira, RB, Almeida, RMVR and Pereira, WCA	Computer simulation and discrete-event models in the analysis of a mammography clinic patient flow	Computer Methods and Programs in Biomedicine	2007	87	201-207			Objective: This work develops a discrete-event computer simulation model for the analysis of a mammography clinic performance. Material and methods: Two mammography clinic computer simulation models were developed, based on an existing public sector clinic of the Brazilian Cancer Institute, located in Rio de Janeiro city, Brazil. Two clinics in a total of seven configurations (number of equipment…
Coffeng, LE, Stolk, WA, Zour√©, HGM, Veerman, JL, Agblewonu, KB, Murdoch, ME, Noma, M, Fobi, G, Richardus, JH, Bundy, DAP, Habbema, D, de Vlas, SJ and Amazigo, UV	African Programme for Onchocerciasis Control 1995-2015: Model-Estimated Health Impact and Cost	PLoS Neglected Tropical Diseases	2013	7				Background: Onchocerciasis causes a considerable disease burden in Africa, mainly through skin and eye disease. Since 1995, the African Programme for Onchocerciasis Control (APOC) has coordinated annual mass treatment with ivermectin in 16 countries. In this study, we estimate the health impact of APOC and the associated costs from a program perspective up to 2010 and provide expected trends up t…
Cohen, JE and Gurtler, RE	Modeling household transmission of American trypanosomiasis	Science	2001	293	694-8			American trypanosomiasis, or Chagas disease, caused by the protozoan parasite Trypanosoma cruzi and transmitted by blood-feeding triatomine bugs, is a chronic, frequently fatal infection that is common in Latin America. Neither adequate drugs nor a vaccine is available. A mathematical model calibrated to detailed household data from three villages in northwest Argentina shows that householders co…
Cohen, T, Lipsitch, M, Walensky, RP and Murray, M	Beneficial and perverse effects of isoniazid preventive therapy for latent tuberculosis infection in HIV-tuberculosis coinfected populations	Proceedings of the National Academy of Sciences of the United States of America	2006	103	7042-7			In sub-Saharan Africa, where the emergence of HIV has caused dramatic increases in tuberculosis (TB) case notifications, new strategies for TB control are necessary. Isoniazid preventive therapy (IPT) for HIV-TB coinfected individuals reduces the reactivation of latent Mycobacterium tuberculosis infections and is being evaluated as a potential community-wide strategy for improving TB control. We …
Colantonio, L, Gomez, JA, Demarteau, N, Standaert, B, Pichon-Riviere, A and Augustovski, F	Cost-effectiveness analysis of a cervical cancer vaccine in five Latin American countries	Vaccine	2009	27	5519-29			Implementation of cervical cancer (CC) vaccination in Latin America is expected to reduce the high CC burden in those countries. But the efficiency of such vaccination programs in the region still remains unknown. This study assesses the cost-effectiveness and cost-utility of introducing vaccination into the current CC disease management of five Latin American countries (Argentina, Brazil, Chile,…
Coleman, PG, Morel, C, Shillcutt, S, Goodman, C and Mills, AJ	A threshold analysis of the cost-effectiveness of artemisinin-based combination therapies in sub-saharan Africa	American Journal of Tropical Medicine & Hygiene	2004	71	196-204			Artemisinin-based combination therapies (ACTs) are generally regarded as vital in addressing the growing problem posed by the development of antimalarial resistance across sub-Saharan Africa. However, the costs of the new ACTs are likely to be significantly higher than current therapies. Therefore, it is important to examine formally the cost-effectiveness of the more effective yet more expensive…
Collins, IJ, Cairns, J, Ngo-Giang-Huong, N, Sirirungsi, W, Leechanachai, P, Le Coeur, S, Samleerat, T, Kamonpakorn, N, Mekmullica, J, Jourdain, G, Lallemant, M and Programme For Hiv Prevention, T	Cost-Effectiveness of Early Infant HIV Diagnosis of HIV-Exposed Infants and Immediate Antiretroviral Therapy in HIV-Infected Children under 24 Months in Thailand	Plos One	2014	9	10			Background: HIV-infected infants have high risk of death in the first two years of life if untreated. WHO guidelines recommend early infant HIV diagnosis (EID) of all HIV-exposed infants and immediate antiretroviral therapy (ART) in HIV-infected children under 24-months. We assessed the cost-effectiveness of this strategy in HIV-exposed non-breastfed children in Thailand. Methods: A decision anal…
Connolly, MP, Topachevskyi, O, Standaert, B, Ortega, O and Postma, M	The impact of rotavirus vaccination on discounted net tax revenue in Egypt: a government perspective analysis	Pharmacoeconomics	2012	30	681-95			BACKGROUND: We evaluated national rotavirus (RV) immunization programme costs to estimate how resulting changes in morbidity and mortality will influence government fiscal accounts over time. The assumption was that increased childhood survival in vaccinated cohorts leads to increased numbers of children consuming government resource, and an increased number of future tax payers.;OBJECTIVE: Our o…
Constenla, D, Vel√°zquez, FR, Rheingans, RD, Antil, L and Cervantes, Y	Economic impact of a rotavirus vaccination program in Mexico	Revista Panamericana de Salud Publica/Pan American Journal of Public Health	2009	25	481-490			Objectives. To evaluate the cost and benefits of a national rotavirus childhood vaccination program in Mexico. Methods. A decision-analysis model was designed to take the Mexican health care system's perspective on a comparison of two alternatives: to vaccinate against rotavirus or not. Using published, national data, estimations were calculated for the rotavirus illnesses, deaths, and disability…
Constenla, DO	Economic impact of pneumococcal conjugate vaccination in Brazil, Chile, and Uruguay	Pan American Journal of Public Health	2008	24	101-12			OBJECTIVES: To evaluate the economic impact of vaccination with the pneumococcal 7-valent conjugate vaccine (PCV7) in Brazil, Chile, and Uruguay.;METHODS: A decision analytic model was constructed to compare pneumococcal vaccination of children 0-5 years old with no vaccination in Brazil, Chile, and Uruguay. Costs and health outcomes were analyzed from the societal perspective. Vaccine, demograph…
Constenla, DO, Linhares, AC, Rheingans, RD, Antil, LR, Waldman, EA and da Silva, LJ	Economic impact of a rotavirus vaccine in Brazil	Journal of Health, Population & Nutrition	2008	26	388-96			The study was done to evaluate the cost-effectiveness of a national rotavirus vaccination programme in Brazilian children from the healthcare system perspective. A hypothetical annual birth-cohort was followed for a five-year period. Published and national administrative data were incorporated into a model to quantify the consequences of vaccination versus no vaccination. Main outcome measures in…
Contreras-Hernandez, I, Becker, D, Chancellor, J, K√ºhne, F, Mould-Quevedo, J, Vega, G and Marfatia, S	Cost-effectiveness of maraviroc for antiretroviral treatment-experienced HIV-infected individuals in Mexico	Value in Health	2010	13	903-914			Objective: Maraviroc is the first approved drug in a new class of antiretrovirals, the CCR5 antagonists. The objective of this study was to predict the long-term clinical impact and cost-effectiveness of maraviroc in treatment-experienced adults with HIV/AIDS in Mexico. Methods: The AntiRetroviral Analysis by Monte Carlo Individual Simulation (ARAMIS) model was adapted to the Mexican context to p…
Coskun, N and Erol, R	An optimization model for locating and sizing emergency medical service stations	Journal of Medical Systems	2010	34	43-9			Emergency medical services (EMS) play a crucial role in the overall quality and performance of health services. The performance of these systems heavily depends on operational success of emergency services in which emergency vehicles, medical personnel and supporting equipment and facilities are the main resources. Optimally locating and sizing of such services is an important task to enhance the…
Costa, AMN, Italien, GL, Nita, ME and Araujo, ESA	Cost-effectiveness of entecavir versus lamivudine for the suppression of viral replication in chronic hepatitis B patients in Brazil	Brazilian Journal of Infectious Diseases	2008	12	368-373			Hepatitis B virus infection is an important public-health issue. Chronic patients have a higher risk of death due to complications, which increases health-care expenses in. Cost-effectiveness analysis of entecavir (ETV) versus lamivudine (LVD) for treatment of chronic hepatitis B, in e antigen (AgHBe)-positive and negative patients, based on two phase 3, controlled and randomized studies. A decis…
Coudeville, L and Garnett, GP	Transmission dynamics of the four dengue serotypes in southern Vietnam and the potential impact of vaccination	PLoS ONE [Electronic Resource]	2012	7	e51244			BACKGROUND: With approximately 2.5 billion people at risk, dengue is a major international public health concern. Dengue vaccines currently in development should help reduce the burden associated with this disease but the most efficient way of using future dengue vaccines remains to be defined. Mathematical models of transmission can provide insight into the expected impact of different vaccinati…
Cox, AP, Foss, AM, Shafer, LA, Nsubuga, RN, Vickerman, P, Hayes, RJ, Watts, C and White, RG	Attaining realistic and substantial reductions in HIV incidence: model projections of combining microbicide and male circumcision interventions in rural Uganda	Sexually Transmitted Infections	2011	87	635-9			OBJECTIVES: This study simulates the potential impact of male circumcision and female microbicide interventions, singularly and in combination, in rural Uganda.;METHODS: A dynamic model was parameterised and fitted to setting-specific data, and used to estimate the impact on HIV transmission of a microbicide and/or male circumcision intervention over 15 years. The proportion of circumcised men or…
Crabb√©, F, Vuylsteke, B, De Clerck, M and Laga, M	Cost-effectiveness of management strategies for acute urethritis in the developing world	Tropical Medicine and International Health	2000	5	640-647			OBJECTIVE To recommend a cost-effective approach for the management of acute male urethritis in the developing world, based on the findings of a theoretical study: METHODS A model was developed to assess the cost-effectiveness of three urethritis management strategies in a theoretical cohort of 1000 men with urethral syndrome. (1) All patients were treated with cefixime and doxycycline for gonoco…
Cremin, I, Alsallaq, R, Dybul, M, Piot, P, Garnett, G and Hallett, TB	The new role of antiretrovirals in combination HIV prevention: a mathematical modelling analysis	Aids	2013	27	447-58			BACKGROUND AND OBJECTIVES: Antiretroviral drugs can reduce HIV acquisition among uninfected individuals (as pre-exposure prophylaxis: PrEP) and reduce onward transmission among infected individuals (as antiretroviral treatment: ART). We estimate the potential impact and cost-effectiveness of antiretroviral-based HIV prevention strategies.;DESIGN AND METHODS: We developed and analysed a mathematic…
Crowell, V, Briet, OJ, Hardy, D, Chitnis, N, Maire, N, Di Pasquale, A and Smith, TA	Modelling the cost-effectiveness of mass screening and treatment for reducing Plasmodium falciparum malaria burden	Malaria Journal	2013	12	4			BACKGROUND: Past experience and modelling suggest that, in most cases, mass treatment strategies are not likely to succeed in interrupting Plasmodium falciparum malaria transmission. However, this does not preclude their use to reduce disease burden. Mass screening and treatment (MSAT) is preferred to mass drug administration (MDA), as the latter involves massive over-use of drugs. This paper rep…
Crowell, V, Hardy, D, Briet, O, Chitnis, N, Maire, N and Smith, T	Can we depend on case management to prevent re-establishment of P. falciparum malaria, after local interruption of transmission?	Epidemics	2012	4	1-8			Recent declines in malaria burden in many parts of the world have prompted consideration of how interruption of Plasmodium falciparum transmission could be maintained, if achieved, and notably whether large-scale vector control could be replaced with surveillance. This information is essential for elimination feasibility assessments and planning. The risk of re-establishment of transmission depen…
Cruz, AM, Rodriguez Denis, E, Sanchez Villar, C, Pozo Punales, ET and Vergara Perez, I	Measured effects of user and clinical engineer training using a queuing model	Biomedical Instrumentation & Technology	2003	37	405-21			This article puts forward a new proposal to calculate count, turnaround, response, and service time of work orders in a clinical engineering (CE) department. These are calculated by means of a queuing model as a measurement tool. This proposal was tested in a 600-bed hospital with an inventory of 1094 medical devices and with 6 full-time clinical engineers. In April 1999, a simulation (with ARENA…
Cruz-Aponte, M, McKiernan, EC and Herrera-Valdez, MA	Mitigating effects of vaccination on influenza outbreaks given constraints in stockpile size and daily administration capacity	BMC Infectious Diseases	2011	11	207			BACKGROUND: Influenza viruses are a major cause of morbidity and mortality worldwide. Vaccination remains a powerful tool for preventing or mitigating influenza outbreaks. Yet, vaccine supplies and daily administration capacities are limited, even in developed countries. Understanding how such constraints can alter the mitigating effects of vaccination is a crucial part of influenza preparedness …
Cunio Machado Fonseca, M, Tannus Branco de Araujo, G, Etto, H, Schiola, A, Santoni, N and Machado, M	Economic evaluation of clodronate and zoledronate in patients diagnosed with metastatic bone disease from the perspective of public and third party payors in Brazil	Clinical Therapeutics	2011	33	1769-1780.e2			BACKGROUND: Metastatic bone disease (MBD) is responsible for >99% of malignant tumors that affect the bone. MBD patients have increased risk of skeletal complications that are often dramatic and result in loss of function or disability, leading to rapid deterioration of quality of life. Bisphosphonates have become the standard therapy for the treatment and prevention of skeletal-related events (S…
Currie, CS, Floyd, K, Williams, BG and Dye, C	Cost, affordability and cost-effectiveness of strategies to control tuberculosis in countries with high HIV prevalence	BMC Public Health	2005	5	130			BACKGROUND: The HIV epidemic has caused a dramatic increase in tuberculosis (TB) in East and southern Africa. Several strategies have the potential to reduce the burden of TB in high HIV prevalence settings, and cost and cost-effectiveness analyses can help to prioritize them when budget constraints exist. However, published cost and cost-effectiveness studies are limited.;METHODS: Our objective …
Dabral, M	Cost-effectiveness of supplementary immunization for measles in India	Indian Pediatrics	2009	46	957-62			OBJECTIVE: This study aims to estimate the incremental cost effectiveness of a supplementary immunization activity (SIA) for measles in a district of India with measles vaccine coverage equivalent to the National average.;DESIGN: A state transition model is used to estimate the effect of routine vaccination with measles vaccine as well as with measles vaccine during the SIA. The model follows eac…
Das, PK and Vanamail, P	Probability risk transmission matrix as a decision tool for assessing methods of transmission interruption of Wuchereria bancrofti infection	Epidemiology & Infection	2008	136	520-4			Lymphatic filariasis continues to cause severe morbidity and economic loss. The World Health Assembly (WHA) has passed a resolution to eliminate this disease by 2020. The major thrust of the elimination strategy is interrupting transmission by anti-parasitic treatment of entire communities. However, both vector density and community microfilaria load (CMFL) influence the intensity of transmission…
Dasbach, EJ, Nagy, L, Brandtmller, A and Elbasha, EH	The cost effectiveness of a quadrivalent human papillomavirus vaccine (6/11/16/18) in Hungary	Journal of Medical Economics	2010	13	110-118			Objective: A transmission dynamic model was used to assess the epidemiological and economic impact of a quadrivalent human papillomavirus (HPV) (6/11/16/18) vaccine in preventing cervical cancer, cervical intraepithelial neoplasia grades 2 and 3 (CIN 2/3), CIN 1 and genital warts in Hungary. Methods: The routine vaccination of 12-year-old girls and the routine vaccination of 12-year-old girls plu…
Dash, U, Vaishnavi, SD and Muraleedharan, VR	Technical Efficiency and Scale Efficiency of District Hospitals: A Case Study	Journal of Health Management	2010	12	231-248			The Government of Tamil Nadu state in India has been implementing various health sector reforms (for example, expansion and upgradation of public health facilities, provision of round the clock services in selected primary health centres and continuous availability of quality medicines decentralisation) in a bid to improve efficiency in health care. However, few attempts have been made to make an…
Davies, A, Bakhai, A, Schmitt, C, Barrett, A, Graham-Clarke, P and Sculpher, M	Prasugrel vs clopidogrel in patients with acute coronary syndrome undergoing percutaneous coronary intervention: a model-based cost-effectiveness analysis for Germany, Sweden, the Netherlands, and Turkey	Journal of Medical Economics	2013	16	510-21			OBJECTIVE: To evaluate the long-term cost-effectiveness of 12-months treatment with prasugrel vs clopidogrel from four European healthcare systems' perspectives (Germany, Sweden, the Netherlands, and Turkey).;METHODS: In the TRITON-TIMI 38 trial, patients with an acute coronary syndrome (ACS) undergoing percutaneous coronary intervention (PCI) were treated with prasugrel or clopidogrel. Prasugrel…
Dayan, GH, Cairns, L, Sangrujee, N, Mtonga, A, Nguyen, V and Strebel, P	Cost-effectiveness of three different vaccination strategies against measles in Zambian children	Vaccine	2004	22	475-84			The vaccination program in Zambia includes one dose of measles vaccine at 9 months of age. The objective of this study was to compare the cost-effectiveness of the current one-dose measles vaccination program with an immunization schedule in which a second dose is provided either through routine health services or through supplemental immunization activities (SIAs). We simulated the expected cost…
Dayan, GH, Nguyen, VH, Debbag, R, Gomez, R and Wood, SC	Cost-effectiveness of influenza vaccination in high-risk children in Argentina	Vaccine	2001	19	4204-13			OBJECTIVES: our study aimed to evaluate the cost-effectiveness of influenza vaccination in high-risk children in Argentina.;METHODS: a decision analysis model was performed, using data from published and unpublished sources, to compare two strategies--to vaccinate or not to vaccinate. We simulated the expected consequences of vaccination on direct medical costs, related to disease management and …
De Arazoza, H, Lounes, R, S√°nchez, A, Barrios, J and Hsieh, YH	Modeling detection of HIV in Cuba	11th International Work-Conference on on Artificial Neural Networks, IWANN 2011	2011		524-531	Torremolinos-Malaga		A nonlinear compartmental model is developed for the HIV detection system in Cuba with different types of detections, some random and others non-random. We analyze the dynamics of this system, compute the reproduction numbers, and use the data from the Cuban HIV/AIDS epidemic between 1986-2008 to fit the model. We obtain estimates for the detection-related parameters during two separate time peri…
de Blasio, BF, Flem, E, Latipov, R, Kuatbaeva, A and Kristiansen, IS	Dynamic Modeling of Cost-effectiveness of Rotavirus Vaccination, Kazakhstan	Emerging Infectious Diseases	2014	20	29-37			The government of Kazakhstan, a middle-income country in Central Asia, is considering the introduction of rotavirus vaccination into its national immunization program. We performed a cost-effectiveness analysis of rotavirus vaccination spanning 20 years by using a synthesis of dynamic transmission models accounting for herd protection. We found that a vaccination program with 90% coverage would p…
De la Hoz, F, Alvis, N, Narvaez, J, Cediel, N, Gamboa, O and Velandia, M	Potential epidemiological and economical impact of two rotavirus vaccines in Colombia	Vaccine	2010	28	3856-64			A complete economic study was carried out to assess the economical impact of two rotavirus vaccine in Colombia. A Markov decision model was built to assess the health outcomes from birth to 24 months of age for three hypothetical cohorts: one unvaccinated, one vaccinated with 2 doses of Rotarix and the third, with 3 doses of Rotateq. Without vaccination, the annual number of medical visits by dia…
De, P, Dhar, A and Bhattacharya, BN	Efficiency of health care system in India: an inter-state analysis using DEA approach	Social Work in Public Health	2012	27	482-506			Since independence a massive personnel and public health infrastructure has been created in India. However, there is no competition and hardly any choice to the poor patients resulting in poor quality services leading to allocative and technical inefficiencies. This study uses the data envelopment analysis model to assess and compare the efficiency of health system within various states of India.…
De So√°rez, PC, Sartori, AMC, De Andrade Lagoa N√≥brega, L, Itria, A and Novaes, HMD	Cost-effectiveness analysis of a universal infant immunization program with meningococcal C conjugate vaccine in Brazil	Value in Health	2011	14	1019-1027			To analyze the cost-effectiveness of a meningococcal C vaccination program in Brazil. A hypothetical cohort of 3,194,038 children born in Brazil in 2006 was followed for 10 years. A decision tree model was developed using the TreeAge Pro 2007 software program to compare universal infant vaccination with the current program. Epidemiological and cost estimates were based on data retrieved from Nati…
de Soarez, PC, Souza, SC, Vieira, JG and Ferraz, MB	The effect of identifying macroprolactinemia on health-care utilization and costs in patients with elevated serum prolactin levels	Value in Health	2009	12	930-4			OBJECTIVES: The routine screening for macroprolactin of all hyperprolactinemic patients may avoid unnecessary imaging procedures and medication prescription. The study described the frequency and types of tests requested after a diagnosis of high serum prolactin concentration, and assessed whether the diagnosis of macroprolactinemia resulted in lower downstream utilization and costs compared with…
De So√¢rez, PC, Valentim, J, Sartori, AMC and Novaes, HMD	Cost-effectiveness analysis of routine rotavirus vaccination in Brazil	Revista Panamericana de Salud Publica/Pan American Journal of Public Health	2008	23	221-230			Objective. The objective of this study was to conduct a cost-effectiveness analysis of a universal rotavirus vaccination program among children < 5 years of age in Brazil. Methods. Considering a hypothetical annual cohort of approximately 3 300 000 newborns followed over 5 years, a decision-tree model was constructed to examine the possible clinical and economic effects of rotavirus infection wit…
de Veras, BMG, e Senna, KMS, Correia, MG and Santos, MS	Cost-effectiveness analysis on the reutilization of coronary artery catheters in a public hospital in Rio de Janeiro, Brazil	Cadernos de Saude Publica	2013	29	S110-S120			The aim of this study was to compare the costeffectiveness ratio of new versus reprocessed coronary artery catheters in a Federal public hospital. This was an analytical decision-making model prepared to estimate the cost-effectiveness ratio between two strategies in the use of materials in coronary artery catheterization, with pyrogenic reaction as the clinical outcome. Costs were estimated usin…
Demarteau, N, Breuer, T and Standaert, B	Selecting a mix of prevention strategies against cervical cancer for maximum efficiency with an optimization program	Pharmacoeconomics	2012	30	337-53			BACKGROUND: Screening and vaccination against human papillomavirus (HPV) can protect against cervical cancer. Neither alone can provide 100% protection. Consequently it raises the important question about the most efficient combination of screening at specified time intervals and vaccination to prevent cervical cancer.;OBJECTIVE: Our objective was to identify the mix of cervical cancer prevention…
Demarteau, N, Morhason-Bello, IO, Akinwunmi, B and Adewole, IF	Modeling optimal cervical cancer prevention strategies in Nigeria	BMC Cancer	2014	14				Background: This study aims to assess the most efficient combinations of vaccination and screening coverage for the prevention of cervical cancer (CC) at different levels of expenditure in Nigeria.Methods: An optimization procedure, using a linear programming approach and requiring the use of two models (an evaluation and an optimization model), was developed. The evaluation model, a Markov model…
Dembele, B, Friedman, A and Yakubu, AA	Mathematical model for optimal use of sulfadoxine-pyrimethamine as a temporary malaria vaccine	Bulletin of Mathematical Biology	2010	72	914-30			In this paper, we introduce a deterministic malaria model for determining the drug administration protocol that leads to the smallest first malaria episodes during the wet season. To explore the effects of administering the malaria drug on different days during the wet season while minimizing the potential harmful effects of drug overdose, we define 40 drug administration protocols. Our results f…
Denova-Gutierrez, E, Garcia-Guerra, A, Flores-Aldana, M, Rodriguez-Ramirez, S and Hotz, C	Simulation model of the impact of biofortification on the absorption of adequate amounts of zinc and iron among Mexican women and preschool children	Food & Nutrition Bulletin	2008	29	203-12			BACKGROUND: Biofortification is an agricultural process that attempts to increase the iron and zinc content of staple food crops. Improving the absorption of zinc and iron could contribute to reducing the high rates of deficiency of these micronutrients in developing-country settings.;OBJECTIVE: To simulate the effects of biofortification of staple food crops (maize, wheat, rice, and beans) on th…
Deo, S, Topp, SM, Garcia, A, Soldner, M, Yagci Sokat, K, Chipukuma, J, Wamulume, CS, Reid, SE and Swann, J	Modeling the impact of integrating HIV and outpatient health services on patient waiting times in an urban health clinic in Zambia	PLoS ONE [Electronic Resource]	2012	7	e35479			BACKGROUND: Rapid scale up of HIV treatment programs in sub-Saharan Africa has refueled the long-standing health policy debate regarding the merits and drawbacks of vertical and integrated system. Recent pilots of integrating outpatient and HIV services have shown an improvement in some patient outcomes but deterioration in waiting times, which can lead to worse health outcomes in the long run.;M…
Dervaux, B, Leleu, H, Valdmanis, V and Walker, D	Parameters of control when facing stochastic demand: a DEA approach applied to Bangladeshi vaccination sites	International Journal of Health Care Finance & Economics	2003	3	287-99			An aim of vaccination programs is near-complete coverage. One method for achieving this is for health facilities providing these services to operate frequently and for many hours during each session. However, if vaccine vials are not fully used, the remainder is often discarded, considered as waste. Without an active appointment schedule process, there is no way for facility staff to control the …
Dhamodharan, A and Proano, RA	Determining the optimal vaccine vial size in developing countries: a Monte Carlo simulation approach	Health Care Management Science	2012	15	188-96			Outreach immunization services, in which health workers immunize children in their own communities, are indispensable to improve vaccine coverage in rural areas of developing countries. One of the challenges faced by these services is how to reduce high levels of vaccine wastage. In particular, the open vial wastage (OVW) that result from the vaccine doses remaining in a vial after a time for saf…
Diaz, M, Kim, JJ, Albero, G, De Sanjos√©, S, Clifford, G, Bosch, FX and Goldie, SJ	Health and economic impact of HPV 16 and 18 vaccination and cervical cancer screening in India	British Journal of Cancer	2008	99	230-238			Cervical cancer is a leading cause of cancer death among women in low-income countries, with ‚àº25% of cases worldwide occurring in India. We estimated the potential health and economic impact of different cervical cancer prevention strategies. After empirically calibrating a cervical cancer model to country-specific epidemiologic data, we projected cancer incidence, life expectancy, and lifetime…
Dib, MW, Riera, R and Ferraz, MB	Estimated annual cost of arterial hypertension treatment in Brazil	Pan American Journal of Public Health	2010	27	125-31			OBJECTIVES: To estimate the direct annual cost of systemic arterial hypertension (SAH) treatment in Brazil's public and private health care systems, assess its economic impact on the total health care budget, and determine its proportion of the 2005 gross domestic product (GDP).;METHODS: A decision tree model was used to determine direct costs based on estimated use of various resources in SAH di…
Dilernia, DA, Monaco, DC, Krolewiecki, A, C√©sar, C, Cahn, P and Salomon, H	The importance of early diagnosis for the survival of HIV positive patients	Medicina	2010	70	453-456			In Argentina, HIV diagnosis is reached by voluntary testing or symptom-based case findings. However, because of the high proportion of infected individuals unaware of their serologic status new strategies are required. In this article we show how a mathematic model predicts the impact of expanding HIV testing in Argentina. The model is based on time-dependent Markov matrixes and applies parameter…
Dimitrov, DT, Boily, MC, Baggaley, RF and Masse, B	Modeling the gender-specific impact of vaginal microbicides on HIV transmission	Journal of Theoretical Biology	2011	288	9-20			Vaginal microbicides (VMB) are currently among the few women-initiated biomedical interventions for preventing heterosexual transmission of HIV. In this paper we use a deterministic model of HIV transmission to assess the public-health benefits of a VMB intervention and evaluate its gender-specific impact over short (initial) and extended periods of time. We define two distinct quantitative benef…
Dimitrov, NB, Moffett, A, Morton, DP and Sarkar, S	Selecting malaria interventions: a top-down approach	Computers & Operations Research	2013	40	2229-40			Malaria continues to be a great burden on both morbidity and mortality as well as economic development across the world. In highly endemic areas, such as Nigeria, malaria can claim hundreds of thousands of lives and millions of dollars yearly. Typically, when selecting intervention strategies to control malaria, research is focused on the cost-effectiveness and general applicability of individual…
Dimitrov, NB and Morton, DP	Combinatorial Design of a Stochastic Markov Decision Process	11th INFORMS-Computing-Society Conference	2009		167-193	Charleston, SC	Springer	We consider a problem in which we seek to optimally design a Markov decision process (MDP). That is, subject to resource constraints we first design the action sets that will be available in each state when we later optimally control the process. The control policy is subject to additional constraints governing state-action pair frequencies, and we allow randomized policies. When the design decis…
Dimitrova, M, Petrova, G, Cervenjakova, T, Jancheva, N, Stefanova, M, Manova, M, Savova, A and Stoimenova, A	Budget impact model of new antiretroviral biotechnology medicines for treatment of HIV/aids patients in Bulgaria	Biotechnology and Biotechnological Equipment	2011	25	2547-2554			The objective of the study is to evaluate the impact of the new highly active antiretroviral biotechnology medicines (tenofovir disoproxil, emtricitabin and darunavir) on the clinical centre health care budget for AIDS in 2011 for a one year time horizon. A computer simulated budget impact model is created to calculate the budget impact of the new biotechnology medicines as a difference among the…
Ding, D, Kilgore, PE, Clemens, JD, Wei, L and Zhi-Yi, X	Cost-effectiveness of routine immunization to control Japanese encephalitis in Shanghai, China	Bulletin of the World Health Organization	2003	81	334-42			OBJECTIVE: To assess the cost-effectiveness of inactivated and live attenuated Japanese encephalitis (JE) vaccines given to infants and children in Shanghai.;METHODS: A decision-analytical model was constructed in order to compare costs and outcomes for three hypothetical cohorts of 100,000 children followed from birth in 1997 to the age of 30 years who received either no JE vaccine, inactivated …
Djema, H and Djerdjouri, M	A two-stage DEA with partial least squares regression model for performance analysis in healthcare in Algeria	International Journal of Applied Decision Sciences	2012	5	118-141			Governments in many developing countries are overwhelmed by the inefficiencies of their healthcare facilities. This is the main cause of increasing healthcare costs. A major challenge faced by policy makers and administrators is how to assess and identify these inefficiencies. In this paper, we discuss measuring operational efficiency of public hospitals in Algeria using a two-stage DEA and parti…
Dodd, PJ, Garnett, GP and Hallett, TB	Examining the promise of HIV elimination by 'test and treat' in hyperendemic settings	Aids	2010	24	729-U128			Background: It has been suggested that a new strategy for HIV prevention, 'Universal Test and Treat', whereby everyone is tested for HIV once a year and treated immediately with antiretroviral therapy (ART) if they are infected, could 'eliminate' the epidemic and reduce ART costs in the long term. Methods: We investigated the impact of test-and-treat interventions under a variety of assumptions a…
Dodd, PJ, White, RG and Corbett, EL	Periodic Active Case Finding for TB: When to Look?	Plos One	2011	6	11			Objective: To investigate the factors influencing the performance and cost-efficacy of periodic rounds of active case finding (ACF) for TB. Methods: A mathematical model of TB dynamics and periodic ACF (PACF) in the HIV era, simplified by assuming constant prevalence of latent TB infection, is analyzed for features that control intervention outcome, measured as cases averted and cases found. Expl…
Doerner, K, Focke, A and Gutjahr, WJ	Multicriteria tour planning for mobile healthcare facilities in a developing country	European Journal of Operational Research	2007	179	1078-1096			A multiobjective combinatorial optimization (MOCO) formulation for the following location-routing problem in healthcare management is given: For a mobile healthcare facility, a closed tour with stops selected from a given set of population nodes has to be found. Tours are evaluated according to three criteria: (i) An economic efficiency criterion related to the tour length, (ii) the criterion of …
Dowdy, DW and Chaisson, RE	The persistence of tuberculosis in the age of DOTS: Reassessing the effect of case detection	Bulletin of the World Health Organization	2009	87	296-304			Objective To investigate whether short-term annual declines of 5-10% in the incidence of tuberculosis (TB) can be sustained over the long term by maintaining high case detection rates (CDRs). Methods We constructed a compartmental difference-equation model of a TB epidemic in a hypothetical population of constant size with a treatment success rate of 85%. The impact of CDR on TB incidence was the…
Dowdy, DW, Chaisson, RE, Maartens, G, Corbett, EL and Dorman, SE	Impact of enhanced tuberculosis diagnosis in South Africa: a mathematical model of expanded culture and drug susceptibility testing	Proceedings of the National Academy of Sciences of the United States of America	2008	105	11293-8			South Africa has high rates of tuberculosis (TB), including multidrug-resistant (MDR) and extensively drug-resistant (XDR) strains. Expanding access to culture and drug susceptibility testing (DST) for TB diagnosis may help control this epidemic, but the potential impact of existing and novel TB diagnostics is uncertain. By fitting to World Health Organization epidemiological estimates, we develo…
Dowdy, DW, Chaisson, RE, Moulton, LH and Dorman, SE	The potential impact of enhanced diagnostic techniques for tuberculosis driven by HIV: a mathematical model	Aids	2006	20	751-62			OBJECTIVE: To explore the potential impact of enhanced tuberculosis (TB) diagnostic techniques as a TB control strategy in an adult population with high HIV prevalence.;DESIGN: A compartmental difference-equation model of TB/HIV was developed using parameter estimates from the literature.;METHODS: The impact of five TB control interventions (rapid molecular testing, mycobacterial culture, communi…
Dowdy, DW, Davis, JL, den Boon, S, Walter, ND, Katamba, A and Cattamanchi, A	Population-Level Impact of Same-Day Microscopy and Xpert MTB/RIF for Tuberculosis Diagnosis in Africa	Plos One	2013	8	8			Objective: To compare the population-level impact of two World Health Organization-endorsed strategies for improving the diagnosis of tuberculosis (TB): same-day microscopy and Xpert MTB/RIF (Cepheid, USA). Methods: We created a compartmental transmission model of TB in a representative African community, fit to the regional incidence and mortality of TB and HIV. We compared the population-level …
Dowdy, DW, Lourenco, MC, Cavalcante, SC, Saraceni, V, King, B, Golub, JE, Bishai, D, Durovni, B, Chaisson, RE and Dorman, SE	Impact and cost-effectiveness of culture for diagnosis of tuberculosis in HIV-infected Brazilian adults	PLoS ONE [Electronic Resource]	2008	3	e4057			BACKGROUND: Culture of Mycobacterium tuberculosis currently represents the closest "gold standard" for diagnosis of tuberculosis (TB), but operational data are scant on the impact and cost-effectiveness of TB culture for human immunodeficiency (HIV-) infected individuals in resource-limited settings.;METHODOLOGY/PRINCIPAL FINDINGS: We recorded costs, laboratory results, and dates of initiating TB…
Dowdy, DW, O'Brien, MA and Bishai, D	Cost-effectiveness of novel diagnostic tools for the diagnosis of tuberculosis	International Journal of Tuberculosis & Lung Disease	2008	12	1021-9			SETTING: The potential cost-effectiveness of improved diagnostic tests for tuberculosis (TB) in resource-limited settings is unknown.;OBJECTIVE: To estimate the incremental cost-effectiveness of a hypothetical new point-of-care TB diagnostic test in South Africa, Brazil and Kenya.;DESIGN: Decision-analysis model, adding four diagnostic interventions (sputum smear microscopy, new test, smear plus …
Dowdy, DW, Steingart, KR and Pai, M	Serological testing versus other strategies for diagnosis of active tuberculosis in India: a cost-effectiveness analysis	PLoS Medicine / Public Library of Science	2011	8	e1001074			BACKGROUND: Undiagnosed and misdiagnosed tuberculosis (TB) drives the epidemic in India. Serological (antibody detection) TB tests are not recommended by any agency, but widely used in many countries, including the Indian private sector. The cost and impact of using serology compared with other diagnostic techniques is unknown.;METHODS AND FINDINGS: Taking a patient cohort conservatively equal to…
Dowdy, DW, Van'T Hoog, A, Shah, M and Cobelens, F	Cost-effectiveness of rapid susceptibility testing against second-line drugs for tuberculosis	International Journal of Tuberculosis and Lung Disease	2014	18	647-654+i			BACKGROUND: Drug susceptibility testing (DST) against second-line tuberculosis drugs (SLDs) is essential for improving outcomes among multidrug-resistant (MDR-) and extensively drug-resistant tuberculosis (XDR-TB) cases. OBJECTIVE: To evaluate the potential cost-effectiveness of rapid DST for SLDs. DESIGN: We constructed a decision analysis model of Xpert¬Æ MTB/RIF-based TB diagnosis in East and …
Dranitsaris, G, Truter, I, Lubbe, MS, Sriramanakoppa, NN, Mendonca, VM and Mahagaonkar, SB	Improving patient access to cancer drugs in India: Using economic modeling to estimate a more affordable drug cost based on measures of societal value	International Journal of Technology Assessment in Health Care	2011	27	23-30			BACKGROUND: Using multiples of India's per capita gross domestic product (GDP) as the threshold for economic value as suggested by the World Health Organization (WHO), decision analysis modeling was used to estimate a more affordable monthly cost in India for a hypothetical new cancer drug that provides a 3-month survival benefit to Indian patients with metastatic colorectal cancer (mCRC).;METHOD…
Dube, S, Boily, MC, Mugurungi, O, Mahomva, A, Chikhata, F and Gregson, S	Estimating vertically acquired HIV infections and the impact of the prevention of mother-to-child transmission program in Zimbabwe: insights from decision analysis models	Journal of Acquired Immune Deficiency Syndromes: JAIDS	2008	48	72-81			BACKGROUND: The World Health Organization recommends a single-dose nevirapine (NVP) regimen for prevention of mother-to-child transmission (PMTCT) of HIV in settings without the capacity to deliver more complex regimens, but the population-level impact of this intervention has rarely been assessed.;METHODS: A decision analysis model was developed, parameterized, and applied using local epidemiolo…
Durham, DP, Ndeffo Mbah, ML, Medlock, J, Luz, PM, Meyers, LA, Paltiel, AD and Galvani, AP	Dengue dynamics and vaccine cost-effectiveness in Brazil	Vaccine	2013	31	3957-61			Recent Phase 2b dengue vaccine trials have demonstrated the safety of the vaccine and estimated the vaccine efficacy with further trials underway. In anticipation of vaccine roll-out, cost-effectiveness analysis of potential vaccination policies that quantify the dynamics of disease transmission are fundamental to the optimal allocation of available doses. We developed a dengue transmission and v…
Durier, N, Nguyen, C and White, LJ	Treatment of hepatitis C as prevention: a modeling case study in Vietnam	PLoS ONE [Electronic Resource]	2012	7	e34548			BACKGROUND: Treatment of hepatitis C (HCV) is very effective, achieving a cure in 50-90% of patients. Besides its own good for individuals, this most likely translates in reduced transmission, but this phenomenon has yet to be fully explored.;METHODS AND FINDINGS: In this mathematical modeling study done in the context of Vietnam, we estimated the public health benefit that HCV therapy for inject…
Durski, KN, Kuntz, KM, Yasukawa, K, Virnig, BA, Meya, DB and Boulware, DR	Cost-effective diagnostic checklists for meningitis in resource-limited settings	Journal of Acquired Immune Deficiency Syndromes: JAIDS	2013	63	e101-8			BACKGROUND: Checklists can standardize patient care, reduce errors, and improve health outcomes. For meningitis in resource-limited settings, with high patient loads and limited financial resources, central nervous system diagnostic algorithms may be useful to guide diagnosis and treatment. However, the cost effectiveness of such algorithms is unknown.;METHODS: We used decision analysis methodolo…
Dushoff, J, Patocs, A and Shi, CF	Modeling the Population-Level Effects of Male Circumcision as an HIV-Preventive Measure: A Gendered Perspective	Plos One	2011	6	7			Background: Evidence from biological, epidemiological, and controlled intervention studies has demonstrated that male circumcision (MC) protects males from HIV infection, and MC is now advocated as a public-health intervention against HIV. MC provides direct protection only to men, but is expected to provide indirect protection to women at risk of acquiring HIV from heterosexual transmission. How…
Dye, C	The potential impact of new diagnostic tests on tuberculosis epidemics	Indian Journal of Medical Research	2012	135	737-44			BACKGROUND & OBJECTIVES: New diagnostic tests for tuberculosis, especially those based on nucleic acid amplification, offer the possibility of early and accurate diagnosis of active TB. In this study we use mathematical modelling to explore the potential epidemiological impact of these new tests, with particular reference to India.;METHODS: A behavioural model of patient-doctor interactions embed…
Dziekan, G, Chisholm, D, Johns, B, Rovira, J and Hutin, YJF	The cost-effectiveness of policies for the safe and appropriate use of injection in healthcare settings	Bulletin of the World Health Organization	2003	81	277-285			Objective Poor injection:: practices' transmit potentially life-threatening pathogens. We modelled the cost-effectiveness of policies for the safe and appropriate use of injections in ten epidemiological subregions of the:world in terms of cost per disability-adjusted life year (DALY) averted. Methods The incidence of injection-associated hepatitis B virus (HBV),,hepatitis C virus (HCV); and huma…
Eckhoff, PA	A malaria transmission-directed model of mosquito life cycle and ecology	Malaria Journal	2011	10	303			BACKGROUND: Malaria is a major public health issue in much of the world, and the mosquito vectors which drive transmission are key targets for interventions. Mathematical models for planning malaria eradication benefit from detailed representations of local mosquito populations, their natural dynamics and their response to campaign pressures.;METHODS: A new model is presented for mosquito populat…
Eggleston, K and Yip, W	Hospital competition under regulated prices: application to urban health sector reforms in China	International Journal of Health Care Finance & Economics	2004	4	343-68			We develop a model of public-private hospital competition under regulated prices, recognizing that hospitals are multi-service firms and that equilibria depend on the interactions of patients, hospital administrators, and physicians. We then use data from China to calibrate a simulation model of the impact of China's recent payment and organizational reforms on cost, quality and access. Both the …
Ekwueme, DU, Weniger, BG and Chen, RT	Model-based estimates of risks of disease transmission and economic costs of seven injection devices in sub-Saharan Africa	Bulletin of the World Health Organization	2002	80	859-70			OBJECTIVE: To investigate and compare seven types of injection devices for their risks of iatrogenic transmission of bloodborne pathogens and their economic costs in sub-Saharan Africa.;METHODS: Risk assumptions for each device and cost models were constructed to estimate the number of new hepatitis B virus (HBV) and human immunodeficiency virus (HIV) infections resulting from patient-to-patient,…
Ekwunife, OI, Okafor, CE, Ezenduka, CC and Udeogaranya, PO	Cost-utility analysis of antihypertensive medications in Nigeria: A decision analysis	Cost Effectiveness and Resource Allocation	2013	11				Background: Many drugs are available for control of hypertension and its sequels in Nigeria but some are not affordable for majority of the populace. This serious pharmacoeconomic question has to be answered by the nation's health economists. The objective of this study was to evaluate the cost-effectiveness of drugs from 4 classes of antihypertensive medications commonly used in Nigeria in manag…
El Khoury, AC, Mast, TC, Ciarlet, M, Markson, L, Goveia, MG, Munford, V and Racz, ML	Projecting the effectiveness of RotaTeq (R) against rotavirus-related hospitalisations in Brazil	Memorias Do Instituto Oswaldo Cruz	2011	106	541-545			RotaTeq (R) (Merck & Company, Inc, Whitehouse Station, NJ, USA) is an oral pentavalent rotavirus vaccine (RV5) that has shown high and consistent efficacy in preventing rotavirus gastroenteritis (RGE) in randomised clinical trials previously conducted in industrialised countries with high medical care resources. To date, the efficacy and effectiveness data for RV5 are available in some Latin Amer…
El-Sadr, WM, Coburn, BJ and Blower, S	Modeling the impact on the HIV epidemic of treating discordant couples with antiretrovirals to prevent transmission	Aids	2011	25	2295-9			BACKGROUND: The HPTN 052 study demonstrated a 96% reduction in HIV transmission in discordant couples using antiretroviral therapy (ART).;OBJECTIVE: To predict the epidemic impact of treating HIV-discordant couples to prevent transmission.;DESIGN: Mathematical modeling to predict incidence reduction and the number of infections prevented.;METHODS: Demographic and epidemiological data from Ghana, …
Elgart, J, Caporale, J, Gonzalez, L, Aiello, E, Waschbusch, M and Gagliardino, J	Treatment of type 2 diabetes with saxagliptin: a pharmacoeconomic evaluation in Argentina	Health Economics Review	2013	3	1-9			Background: The increasing prevalence of diabetes and its inadequate management results in a heavy burden of the disease for the patients, the health and the productive system and the overall community. Consequently, it is necessary to have new effective drugs to treat people with diabetes to decrease such burden. DPP-4 inhibitors can help to cope with this demand, but its usage is challenged by …
Ellis, A, R√ºttimann, RW, Jacobs, RJ, Meyerhoff, AS and Innis, BL	Cost-effectiveness of childhood hepatitis A vaccination in Argentina: A second dose is warranted	Revista Panamericana de Salud Publica/Pan American Journal of Public Health	2007	21	345-356			Objectives. To investigate the cost-effectiveness of childhood vaccination against hepatitis A in the five geographic regions of Argentina, and to determine whether adding a second dose to the current one-dose schedule would provide health gains justifying its added cost. Methods. A Markov model was used to consider four immunization options for the 2005 birth cohort: (1) no vaccination; (2) vacc…
Elsisi, GH, Eldessouki, R, Kalo, Z, Elmazar, MM, Taha, AS, Awad, BF and El-Hamamsy, MH	Cost-Effectiveness of the Combined Use of Warfarin and Low-Dose Aspirin versus Warfarin Alone in Egyptian Patients with Aortic Valve Replacements: A Markov Model	Value in Health Regional Issues	2014	4	24-30			Background: The combination of antiplatelet and anticoagulant therapy significantly reduces the rate of thromboembolic events in patients with heart valves compared with anticoagulant therapy alone. Cost-effectiveness of this therapy in Egypt, however, has not yet been established. Objective: The aim of the present study was to evaluate the cost-effectiveness of the combined use of warfarin and l…
Entringer, AP, Gomes, MAS, Pinto, M, Caetano, R, Magluta, C and Lamy, ZC	Cost analysis of hospital care for newborns at risk: Comparison of an intermediate neonatal care unit and a kangaroo unit	Cadernos de Saude Publica	2013	29	1205-1216			The aim of this study was to compare the direct costs of implementation of the Kangaroo Method and an Intermediate Neonatal Care Unit, from the perspective of the Brazilian Unified National Health System (SUS) in Rio de Janeiro, Brazil. Newborns were eligible for inclusion if they were clinically stable and were able to receive care in those two modalities. A decision tree model was developed tha…
Entringer, AP, Pinto, MT, Magluta, C and Gomes, M	Budget impact of using the Kangaroo Method in neonatal care	Revista De Saude Publica	2013	47	7			OBJECTIVE: To estimate the budget impact of using the Kangaroo Method in a municipal health care network. METHODS: An analytical decision model was developed to simulate the costs of the Kangaroo Method and Neonatal Intermediate Care Unit in Rio de Janeiro, RJ, in 2011. The reference population was clinically stable newborns, who may receive either of the two types of care. The budget impact for …
Erim, DO, Resch, SC and Goldie, SJ	Assessing health and economic outcomes of interventions to reduce pregnancy-related mortality in Nigeria	BMC Public Health	2012	12	786			BACKGROUND: Women in Nigeria face some of the highest maternal mortality risks in the world. We explore the benefits and cost-effectiveness of individual and integrated packages of interventions to prevent pregnancy-related deaths.;METHODS: We adapt a previously validated maternal mortality model to Nigeria. Model outcomes included clinical events, population measures, costs, and cost-effectivene…
Eskandari, H, Riyahifard, M, Khosravi, S and Geiger, CD	Improving the emergency department performance using simulation and MCDM methods	2011 Winter Simulation Conference, WSC 2011	2011		1211-1222	Phoenix, AZ		The main purpose of this paper is to introduce a new framework to more efficiently investigate the patient flow of the Emergency Department (ED) of a governmental hospital in Tehran, Iran, in order to find out improving scenarios for reducing waiting times of patients. The proposed framework integrates the simulation model of patients flow process with the group AHP and TOPSIS decision models in …
Espindola, AL, Girardi, D, Penna, TJP, Bauch, CT, Martinez, AS and Cabella, BCT	EXPLORATION OF THE PARAMETER SPACE IN AN AGENT-BASED MODEL OF TUBERCULOSIS SPREAD: EMERGENCE OF DRUG RESISTANCE IN DEVELOPING VS DEVELOPED COUNTRIES	International Journal of Modern Physics C	2012	23	9			In this work we present an agent-based model for the spread of tuberculosis where the individuals can be infected with either drug-susceptible or drug-resistant strains and can also receive a treatment. The dynamics of the model and the role of each one of the parameters are explained. The whole set of parameters is explored to check their importance in the numerical simulation results. The model…
Esposito, DH, Tate, JE, Kang, G and Parashar, UD	Projected impact and cost-effectiveness of a rotavirus vaccination program in India, 2008	Clinical Infectious Diseases	2011	52	171-7			BACKGROUND: To assess the value of rotavirus vaccination in India, we determined the potential impact and cost-effectiveness of a national rotavirus vaccination program.;METHODS: We compared the national rotavirus disease and cost burden with and without a vaccination program and assessed the cost-effectiveness of vaccination. Model inputs included measures of disease and cost burden, vaccine per…
Estill, J, Aubriere, C, Egger, M, Johnson, L, Wood, R, Garone, D, Gsponer, T, Wandeler, G, Boulle, A, Davies, MA, Hallett, TB, Keiser, O and Ie, DEASA	Viral load monitoring of antiretroviral therapy, cohort viral load and HIV transmission in Southern Africa: a mathematical modelling analysis	Aids	2012	26	1403-13			OBJECTIVES: In low-income settings, treatment failure is often identified using CD4 cell count monitoring. Consequently, patients remain on a failing regimen, resulting in a higher risk of transmission. We investigated the benefit of routine viral load monitoring for reducing HIV transmission.;DESIGN: Mathematical model.;METHODS: We developed a stochastic mathematical model representing the cours…
Estill, J, Egger, M, Blaser, N, Vizcaya, LS, Garone, D, Wood, R, Campbell, J, Hallett, TB, Keiser, O and Ie, DEASA	Cost-effectiveness of point-of-care viral load monitoring of antiretroviral therapy in resource-limited settings: mathematical modelling study	Aids	2013	27	1483-92			BACKGROUND: Monitoring of HIV viral load in patients on combination antiretroviral therapy (ART) is not generally available in resource-limited settings. We examined the cost-effectiveness of qualitative point-of-care viral load tests (POC-VL) in sub-Saharan Africa.;DESIGN: Mathematical model based on longitudinal data from the Gugulethu and Khayelitsha township ART programmes in Cape Town, South…
Estill, J, Egger, M, Johnson, LF, Gsponer, T, Wandeler, G, Davies, MA, Boulle, A, Wood, R, Garone, D, Stringer, JS, Hallett, TB, Keiser, O and Ie, DEASAC	Monitoring of antiretroviral therapy and mortality in HIV programmes in Malawi, South Africa and Zambia: mathematical modelling study	PLoS ONE [Electronic Resource]	2013	8	e57611			OBJECTIVES: Mortality in patients starting antiretroviral therapy (ART) is higher in Malawi and Zambia than in South Africa. We examined whether different monitoring of ART (viral load [VL] in South Africa and CD4 count in Malawi and Zambia) could explain this mortality difference.;DESIGN: Mathematical modelling study based on data from ART programmes.;METHODS: We used a stochastic simulation mod…
Estill, J, Tweya, H, Egger, M, Wandeler, G, Feldacker, C, Johnson, LF, Blaser, N, Vizcaya, LS, Phiri, S and Keiser, O	Tracing of patients lost to follow-up and HIV transmission: mathematical modeling study based on 2 large ART programs in Malawi	Journal of Acquired Immune Deficiency Syndromes: JAIDS	2014	65	e179-86			OBJECTIVE: Treatment as prevention depends on retaining HIV-infected patients in care. We investigated the effect on HIV transmission of bringing patients lost to follow-up (LTFU) back into care.;DESIGN: Mathematical model.;METHODS: Stochastic mathematical model of cohorts of 1000 HIV-infected patients on antiretroviral therapy, based on the data from 2 clinics in Lilongwe, Malawi. We calculated …
Fabricius, G, Bergero, PE, Ormazabal, ME, Maltz, AL and Hozbor, DF	Modelling pertussis transmission to evaluate the effectiveness of an adolescent booster in Argentina	Epidemiology and Infection	2013	141	718-734			SUMMARY Due to the current epidemiological situation of pertussis, several countries have implemented vaccination strategies that include a booster dose for adolescents. Since there is still no evidence showing that the adolescent booster has a positive effect on the most vulnerable group represented by infants, it is difficult to universalize the recommendation to include such reinforcement. In …
Fasawe, O, Avila, C, Shaffer, N, Schouten, E, Chimbwandira, F, Hoos, D, Nakakeeto, O and De Lay, P	Cost-Effectiveness Analysis of Option B plus for HIV Prevention and Treatment of Mothers and Children in Malawi	Plos One	2013	8	10			Background: The Ministry of Health in Malawi is implementing a pragmatic and innovative approach for the management of all HIV-infected pregnant women, termed Option B+, which consists of providing life-long antiretroviral treatment, regardless of their CD4 count or clinical stage. Our objective was to determine if Option B+ represents a cost-effective option. Methods: A decision model simulates …
Ferrante, D, Konfino, J, Mejia, R, Coxson, P, Moran, A, Goldman, L and Perez-Stable, EJ	The cost-utility ratio of reducing salt intake and its impact on the incidence of cardiovascular disease in Argentina	Revista Panamericana De Salud Publica-Pan American Journal of Public Health	2012	32	274-280			Objective. Estimate the cost-utility ratio of an intervention to reduce dietary salt intake in people over the age of 35 in Argentina. Methods. The intervention consisted of reducing salt content in food by 5% to 25%. A simulation model was used to measure the impact of policies on heart disease in order to predict incidence, prevalence, mortality, and cost trends for heart and cerebrovascular di…
Ferrante, D, Levy, D, Peruga, A, Compton, C and Romano, E	The role of public policies in reducing smoking prevalence and deaths: the Argentina Tobacco Policy Simulation Model	Pan American Journal of Public Health	2007	21	37-49			OBJECTIVES: To compare tobacco control policies independently and as a package through a simulation model to project smoking prevalence and associated future premature mortality in Argentina beginning in 2001.;METHODS: A simulation model of tobacco control policies known as SimSmoke was modified using data for Argentina on population, fertility and mortality, smoking prevalence, and tobacco contr…
Ferrari, MJ, Grais, RF, Bharti, N, Conlan, AJ, Bjornstad, ON, Wolfson, LJ, Guerin, PJ, Djibo, A and Grenfell, BT	The dynamics of measles in sub-Saharan Africa	Nature	2008	451	679-84			Although vaccination has almost eliminated measles in parts of the world, the disease remains a major killer in some high birth rate countries of the Sahel. On the basis of measles dynamics for industrialized countries, high birth rate regions should experience regular annual epidemics. Here, however, we show that measles epidemics in Niger are highly episodic, particularly in the capital Niamey.…
Ferreira Fernandes Costa Filho, C, Rivera Rocha, DA, Fernandes Costa, MG and Coelho de Albuquerque Pereira, W	Using Constraint Satisfaction Problem approach to solve human resource allocation problems in cooperative health services	Expert Systems with Applications	2012	39	385-94			In developing countries, the increasing utilization of health services, due to a great life expectancy, is followed by a reduction in incomes from the public health system and from private insurance companies, to the payment of medical procedures. Beyond this scenery, it is mandatory an effective hospital cost control though the utilization of planning tools. This work is intended to contribute t…
Ferreira, RB, Coelli, FC, Pereira, WCA and Almeida, RMVR	Optimizing patient flow in a large hospital surgical centre by means of discrete-event computer simulation models	Journal of Evaluation in Clinical Practice	2008	14	1031-1037			Objective: This study used the discrete-events computer simulation methodology to model a large hospital surgical centre (SC), in order to analyse the impact of increases in the number of post-anaesthetic beds (PABs), of changes in surgical room scheduling strategies and of increases in surgery numbers. Methods: The used inputs were: number of surgeries per day, type of surgical room scheduling, …
Fitzpatrick, MC, Hampson, K, Cleaveland, S, Mzimbiri, I, Lankester, F, Lembo, T, Meyers, LA, Paltiel, AD and Galvani, AP	Cost-effectiveness of canine vaccination to prevent human rabies in rural Tanzania	Annals of Internal Medicine	2014	160	91-100			BACKGROUND: The annual mortality rate of human rabies in rural Africa is 3.6 deaths per 100 000 persons. Rabies can be prevented with prompt postexposure prophylaxis, but this is costly and often inaccessible in rural Africa. Because 99% of human exposures occur through rabid dogs, canine vaccination also prevents transmission of rabies to humans.;OBJECTIVE: To evaluate the cost-effectiveness of …
Fitzpatrick, T and Bauch, CT	The potential impact of immunization campaign budget re-allocation on global eradication of paediatric infectious diseases	Bmc Public Health	2011	11	16			Background: The potential benefits of coordinating infectious disease eradication programs that use campaigns such as supplementary immunization activities (SIAs) should not be over-looked. One example of a coordinated approach is an adaptive "sequential strategy": first, all annual SIA budget is dedicated to the eradication of a single infectious disease; once that disease is eradicated, the ann…
Flessa, S	Where efficiency saves lives: a linear programme for the optimal allocation of health care resources in developing countries	Health Care Management Science	2000	3	249-67			Morbidity and mortality are directly influenced by the available health care budget. In addition, the optimal allocation of this scarce resource to the different strata of the health care system depends on the health care priorities. This paper presents a linear programming model in order to analyse the impact of changes of the health care budget and the goal system of the health care system on t…
Flessa, S	Resource allocation and time preference in the district health care planning of developing countries	Or Spektrum	2001	23	203-222			The inter-temporal allocation of scarce resources to different providers of services is influenced by the time preference of decision makers. This paper develops a model of non-linear programming in order to allocate the district health care budget to the different levels of curative and preventive care. It becomes obvious that a high time preference fosters curative services, whereas a strong fu…
Flessa, S	Priorities and allocation of health care resources in developing countries: a case-study from the Mtwara region, Tanzania	European Journal of Operational Research	2003	150	67-80			Models of health economics usually maximise the sum of individual health. However, as the term health reflects very different aspects of well being, quite different objectives can be derived for the allocation of health care resources. This paper analyses the optimum allocation of health care resources in the Mtwara region, Tanzania, for five different objectives: minimisation of death cases, min…
Flessa, S	Decision support for AIDS control programmes in Eastern Africa	OR Spectrum	2003	25	265-91			The Acquired Immune Deficiency Syndrome (AIDS) constitutes the worst hazard to health care systems in Eastern Africa. Misallocation of scarce resources of AIDS Control Programmes will unavoidably lead to additional infections and casualties. The following paper discusses a system dynamics model which allows to assess the impact of different interventions on a pattern population in Eastern Africa.…
Florez, DC, Aguirre, S, Amaya, CA and Velasco, N	Optimization of the laundry service in a public hospital in Bogota D.C., Colombia: a case of vehicle routing with split delivery	IEEE Systems and Information Engineering Design Symposium (SIEDS 2008), 25 April 2008	2008		106-11	Piscataway, NJ, USA	IEEE	Logistic activities inside a hospital are present in different work areas, and are designed to support other health care related activities. In some hospitals, logistic activities are planned based on the experience of people that are directly involved in them, which leads to question if this is or not, the best way to carry out the planning process. The mixed-integer linear programming model pro…
Fonseca, AJ, Ferreira, LC and Neto, GB	Cost-effectiveness of the vaccine against human papillomavirus in the Brazilian Amazon region	Revista Da Associacao Medica Brasileira	2013	59	442-51			OBJECTIVE: To assess the cost-utility of the human papillomavirus (HPV) vaccination on the prevention of cervical cancer in the Brazilian Amazon region.;METHODS: A Markov cohort model was developed to simulate the natural evolution of HPV and its progress to cervical cancer, considering the current preventive programs and treatment costs. The one-year transition probabilities were mainly based on…
Fonseca, M, Araujo, GT and Saad, ED	Cost-effectiveness of anastrozole, in comparison with tamoxifen, in the adjuvant treatment of early breast cancer in Brazil	Revista Da Associacao Medica Brasileira	2009	55	410-5			OBJECTIVE: Breast cancer, a leading type of cancer in many developing countries, is the most frequent non-cutaneous tumor in Brazil. Hormone therapy is the standard of care in the adjuvant treatment of early-stage, hormone-receptor-positive disease, and both tamoxifen and third-generation aromatase inhibitors are options in postmenopausal women. The comparative cost-effectiveness of different tre…
Fonseca, MGP, Forsythe, S, Menezes, A, Vuthoori, S, Possas, C, Veloso, V, de F√°tima Lucena, F and Stover, J	Modeling HIV Vaccines in Brazil: Assessing the Impact of a Future HIV Vaccine on Reducing New Infections, Mortality and Number of People Receiving ARV	PLoS ONE	2010	5	e11736			<sec> <title>Background</title> <p>The AIDS epidemic in Brazil remains concentrated in populations with high vulnerability to HIV infection, and the development of an HIV vaccine could make an important contribution to prevention. This study modeled the HIV epidemic and estimated the potential impact of an HIV vaccine on the number of new infections, deaths due to AIDS and the number of people re…
Foss, AM, Vickerman, PT, Heise, L and Watts, CH	Shifts in condom use following microbicide introduction: Should we be concerned?	AIDS	2003	17	1227-1237			Objectives: Abandoning condoms for microbicides is termed 'condom migration'. This study estimated the reduction in condom use that can be tolerated following the introduction of an HIV- and sexually transmitted disease (STD)-efficacious microbicide without increasing an individual's risk of HIV infection, and explored how microbicide use affects HIV-risk. Design: Development of a static mathemat…
Freedberg, KA, Kumarasamy, N, Losina, E, Cecelia, AJ, Scott, CA, Divi, N, Flanigan, TP, Lu, Z, Weinstein, MC, Wang, B, Ganesh, AK, Bender, MA, Mayer, KH and Walensky, RP	Clinical impact and cost-effectiveness of antiretroviral therapy in India: starting criteria and second-line therapy	Aids	2007	21 Suppl 4	S117-28			BACKGROUND: India has more than 5.7 million people infected with human immunodeficiency virus (HIV). In 2004, the Indian government began providing antiretroviral therapy (ART), and there are now an estimated 56 500 people receiving ART.;OBJECTIVE: To project the life expectancy, cost, and cost-effectiveness associated with different strategies for using ART in India, to inform treatment programs…
Frega, R, Lanfranco, JG, De Greve, S, Bernardini, S, Geniez, P, Grede, N, Bloem, M and de Pee, S	What linear programming contributes: world food programme experience with the "cost of the diet" tool	Food & Nutrition Bulletin	2012	33	S228-34			BACKGROUND: Linear programming has been used for analyzing children's complementary feeding diets, for optimizing nutrient adequacy of dietary recommendations for a population, and for estimating the economic value of fortified foods.;OBJECTIVE: To describe and apply a linear programming tool ("Cost of the Diet") with data from Mozambique to determine what could be cost-effective fortification st…
Frick, KD, Riva-Clement, L and Shankar, MB	Screening for refractive error and fitting with spectacles in rural and urban India: cost-effectiveness	Ophthalmic Epidemiology	2009	16	378-87			OBJECTIVES: To assess the cost-effectiveness of screening for refractive error and fitting with glasses in India.;METHODS: We populated a decision tree with the costs of screening and spectacles, prevalence of varying levels of presenting and best corrected visual acuity (BCVA) from two studies, and sensitivity and specificity of screening. We calculated dollars spent per disability adjusted life…
Friedman, HB, Gift, TL, Susanti, I and Wasserheit, JN	Risk-based versus alternative algorithms for antibiotic prophylaxis among women seeking early suction abortion: a cost-effectiveness simulation	Sexually Transmitted Diseases	2001	28	714-24			BACKGROUND: Particularly in resource-poor settings, simple, inexpensive, and cost-effective algorithms are needed to direct antibiotic prophylaxis to prevent sequelae of infections with Chlamydia trachomatis, Neisseria gonorrhoeae, and bacterial vaginosis-associated organisms among women undergoing abortion.;GOAL: To assess the prevalence of and risk factors for infections among women seeking abo…
Friedrich, S and Van Dyk, L	Developing a decision support system for nurse scheduling at a public hospital in South Africa	42nd International Conference on Computers and Industrial Engineering 2012, CIE 2012	2012	1	41-49	Cape Town		Stellenbosch Hospital is situated in the Western Cape of South Africa. It is an 85- bed public facility and serves a community of 170 000 people. Based on a root cause analysis the conclusion was made that nurse utilization and employee morale at the hospital could be improved by granting nurses more control over schedules. The purpose of this project is to develop a nurse scheduling Decision Sup…
Fukuhara, K, Phompida, S, Insisiengmay, S, Kirinoki, M, Chigusa, Y, Nakamura, S, Matsuda, H and Ishikawa, H	Analysis of the effectiveness of control measures against Schistosoma mekongi using an intra- and inter-village model in Champasak Province, Lao PDR	Parasitology International	2011	60	452-9			Schistosomiasis mekongi is prevalent in the Khong district of Lao PDR, made up of one big island, Khong, and numerous small islands in the Mekong River. Schistosoma mekongi is spread by Neotricula aperta as the intermediate host along the Mekong River. Therefore, even if an epidemic of S. mekongi were stamped out in a certain village, infection may recur if the source of infection is a village lo…
Fullerton, JT, Frick, KD, Fogarty, LA, Fishel, JD and Vivio, DM	Active management of third stage of labour saves facility costs in Guatemala and Zambia	Journal of Health, Population & Nutrition	2006	24	540-51			This study calculated the net benefit of using active management of the third stage of labour (AMTSL) rather than expectant management of the third stage of labour (EMTSL) for mothers in Guatemala and Zambia. Probabilities of events were derived from opinions of experts, publicly available data, and published literature. Costs of clinical events were calculated based on national price lists, obse…
Gai, RY, Zhou, CC, Xu, LZ, Zhu, M, Wang, XZ, Li, SX, Zheng, WG, Song, PP, Yang, XL, Fang, LY, Zhen, YC and Tang, W	Health resource allocation and productive efficiency of Chinese county hospitals: data from 1993 to 2005	Bioscience Trends	2010	4	218-24			This study aims to assess trends in the productive efficiency of China's county hospitals during the economic transition using data from 1993 to 2005. A data envelopment analysis (DEA) framework was used to calculate the efficiency score of county hospitals in all 31 provinces. A C2R model and a BC2 model were devised to respectively calculate overall and scale efficiency and pure technical effic…
Galv√£o, RD, Acosta Espejo, LG and Boffey, B	A hierarchical model for the location of perinatal facilities in the municipality of Rio de Janeiro	European Journal of Operational Research	2002	138	495-517			We present a 3-level hierarchical model for the location of maternal and perinatal health care facilities in Rio de Janeiro. Relaxations and heuristics are developed for this model and computational results are given for problems available in the literature, for networks ranging from 10 to 400 vertices. The quality of the solutions produced by the procedures we developed do not differ significant…
Gambhir, M, Bas√°√±ez, MG, Blake, IM and Grassly, NC	Modelling trachoma for control programmes	Advances in Experimental Medicine and Biology	2010	673	141-156			Trachoma is a major cause of blindness in the developing world and 63 million people are currently infected. Large-scale control programmes are being implemented to clear ocular Chlamydia trachomatis infection-the causative agent of trachoma-and improve environmental conditions to reduce transmission. Chemotherapeutic intervention involves antibiotic administration and the effectiveness of this t…
Gambhir, M, Bas√°√±ez, MG, Burton, MJ, Solomon, AW, Bailey, RL, Holland, MJ, Blake, IM, Donnelly, CA, Jabr, I, Mabey, DC and Grassly, NC	The development of an age-structured model for trachoma transmission dynamics, pathogenesis and control	PLoS Neglected Tropical Diseases	2009	3				Background: Trachoma, the worldwide leading infectious cause of blindness, is due to repeated conjunctival infection with Chlamydia trachomatis. The effects of control interventions on population levels of infection and active disease can be promptly measured, but the effects on severe ocular sequelae require long-term monitoring. We present an age-structured mathematical model of trachoma transm…
Ganesh, K, Ganesh, S, Narendran, TT and Muraleedharan, VR	Drug inventory management at public healthcare institutions - a case study	International Journal of Logistics Economics and Globalisation	2011	3	155-87			Public healthcare institutions in India continue to be the major source of healthcare in both rural and urban areas. This study has considered resource utilisation in the context of drug supplies to the public healthcare. Drug inventory management assessment tool (DIMAT) is developed to quantify the shortcomings of the drug supply/management in terms of performance indicators. This is followed by…
Gao, L and Hethcote, H	Simulations of rubella vaccination strategies in China	Mathematical Biosciences	2006	202	371-85			Many infants whose mothers have rubella infections during their first trimester of pregnancy have birth defects called congenital rubella syndrome (CRS). China does not routinely vaccinate against rubella in the public sector, but may need to start as its 'one child per couple' policy changes the population age distribution and the dynamics of rubella epidemiology, so that the incidence of rubell…
Gao, SJ, He, YY, Liu, YJ, Yang, GJ and Zhou, XN	Field transmission intensity of Schistosoma japonicum measured by basic reproduction ratio from modified Barbour's model	Parasites & Vectors [Electronic Resource]	2013	6	141			BACKGROUND: Schistosomiasis japonica, caused by infection with Schistosoma japonicum, is still recognized as a major public health problem in the Peoples' Republic of China. Mathematical modelling of schistosomiasis transmission has been undertaken in order to assess and project the effects of various control strategies for elimination of the disease. Seasonal fluctuations in transmission may hav…
Garc√≠a-Contreras, F, Nev√°rez-Sida, A, Constantino-Casas, P, Abud-Bastida, F and Gardu√±o-Espinosa, J	Cost-effectiveness of Chronic Hepatitis C Treatment with Thymosin Alpha-1	Archives of Medical Research	2006	37	663-673			Background: More than one million individuals in Mexico are infected with hepatitis C virus (HCV), and 80% are at risk for developing a chronic infection that could lead to hepatic cirrhosis and other complications that impact quality of life and institutional costs. The objective of the study was to determine the most cost-effective treatment against HCV among the following: peginterferon, pegin…
Gatton, ML and Cheng, Q	Interrupting Malaria Transmission: Quantifying the Impact of Interventions in Regions of Low to Moderate Transmission	Plos One	2010	5	9			Malaria has been eliminated from over 40 countries with an additional 39 currently planning for, or committed to, elimination. Information on the likely impact of available interventions, and the required time, is urgently needed to help plan resource allocation. Mathematical modelling has been used to investigate the impact of various interventions; the strength of the conclusions is boosted whe…
Gaziano, TA, Opie, LH and Weinstein, MC	Cardiovascular disease prevention with a multidrug regimen in the developing world: a cost-effectiveness analysis	Lancet	2006	368	679-86			BACKGROUND: Cardiovascular disease is the leading cause of death, with 80% of cases occurring in developing countries. We therefore aimed to establish whether use of evidence-based multidrug regimens for patients at high risk for cardiovascular disease would be cost-effective in low-income and middle-income countries.;METHODS: We used a Markov model to do a cost-effectiveness analysis with two co…
Gaziano, TA, Steyn, K, Cohen, DJ, Weinstein, MC and Opie, LH	Cost-effectiveness analysis of hypertension guidelines in South Africa: absolute risk versus blood pressure level	Circulation	2005	112	3569-76			BACKGROUND: Hypertension is responsible for more deaths worldwide than any other cardiovascular risk factor. Guidelines based on blood pressure level for initiation of treatment of hypertension may be too costly compared with an approach based on absolute cardiovascular disease (CVD) risk, especially in developing countries.;METHODS AND RESULTS: Using a Markov CVD model, we compared 6 strategies …
Georg, AE, Duncan, BB, Toscano, CM, Schmidt, MI, Mengue, S, Duarte, C, Polanczyk, CA and Grupo Trabalho Avaliacao, C	Economic analysis of a screening program for diabetes mellitus in Brazil	Revista De Saude Publica	2005	39	452-460			Objective Diabetes mellitus is a common disease and costly public health concern and an expressive number of affected individuals have undiagnosed diabetes mellitus. In 2001, the Brazilian Ministry of Health conducted a national diabetes screening campaign. The purpose of this study was to estimate the yield and economic impact Of this screening strategy. Methods Based on positive screenees (fast…
Gerberry, DJ and Milner, FA	Could changes in national tuberculosis vaccination policies be ill-informed ?	Mathematical Modelling of Natural Phenomena	2012	7	78-98			National policies regarding the BCG vaccine for tuberculosis vary greatly throughout the international community and several countries are currently considering discontinuing universal vaccination. Detractors of BCG point to its uncertain effectiveness and its interference with the detection and treatment of latent tuberculosis infection (LTBI). In order to quantify the trade-off between vaccinat…
Ghaderi, A and Jabalameli, MS	Modeling the budget-constrained dynamic uncapacitated facility location-network design problem and solving it via two efficient heuristics: A case study of health care	Mathematical and Computer Modelling	2013	57	382-400			This paper presents a model for the budget-constrained dynamic (multi-period) uncapacitated facility location-network design problem (DUFLNDP). This problem is concerned with the determination of the optimal locations of facilities and the design of the underlying network simultaneously in which there is a budget constraint on investment for opening the facilities and constructing (activating) li…
Ghani, AC, Sutherland, CJ, Riley, EM, Drakeley, CJ, Griffin, JT, Gosling, RD and Filipe, JA	Loss of population levels of immunity to malaria as a result of exposure-reducing interventions: consequences for interpretation of disease trends	PLoS ONE [Electronic Resource]	2009	4	e4383			BACKGROUND: The persistence of malaria as an endemic infection and one of the major causes of childhood death in most parts of Africa has lead to a radical new call for a global effort towards eradication. With the deployment of a highly effective vaccine still some years away, there has been an increased focus on interventions which reduce exposure to infection in the individual and -by reducing…
Ghoshal, UC, Aggarwal, R, Kumar, S and Naik, SR	Pneumatic dilation versus intrasphincteric botulinum toxin injection in the treatment of achalasia cardia in India: an economic analysis	Indian Journal of Gastroenterology	2002	21	193-6			BACKGROUND: Pneumatic dilation (PD) is an established therapeutic option for achalasia cardia. Recently, intrasphincteric botulinum toxin (BT) has been used to treat achalasia cardia in view of its simplicity and safety. However, it is likely to be a costly treatment as repeated injections are often needed due to its short-lasting effect. No economic analysis of PD and BT strategies has been done…
Ghoshal, UC and Das, A	Management strategies for duodenal ulcer in India in the helicobacter pylori era: an economic analysis	National Medical Journal of India	2002	15	140-4			BACKGROUND: Duodenal ulcer (DU) is widely prevalent in India. Eradication of Helicobacter pylori (H. pylori) is considered to be the most cost-effective first-line therapy for DU in patients without a historyof use of non-steroidal anti-inflammatory drugs. Western investigators recommend initial empirical anti-H. pylori therapy for such patients. However, in India similar recommendations are lack…
Giglio, N, Gentile, A, Lees, L, Micone, P, Armoni, J, Reygrobellet, C and Cr√©pey, P	Public health and economic benefits of new pediatric influenza vaccination programs in Argentina	Human Vaccines and Immunotherapeutics	2012	8	302-312			Background: Argentina's population was heavily affected by the 2009 influenza pandemic, particularly children, in whom incidence of seasonal influenza is consistently high. Following the pandemic, Argentinean national recommendations for pediatric vaccination against A/H1N1 influenza were defined for all children aged up to five years, in line with programs implemented by national authorities els…
Giglio, ND, Cane, AD, Micone, P and Gentile, A	Cost-effectiveness of the CRM-based 7-valent pneumococcal conjugated vaccine (PCV7) in Argentina	Vaccine	2010	28	2302-10			UNLABELLED: Due to the region's own conditions, universal vaccination with pneumococcal conjugate heptavalent vaccine (PCV-7) in Latin American countries is still controversial.;OBJECTIVE: To compare projected economic costs and health benefits associated with pneumococcal conjugate heptavalent vaccine as a routine immunization in healthy children in Argentina.;DESIGN: A decision analytic model o…
Gilbert, AR, Pinget, C, Bovet, P, Cornuz, J, Shamlaye, C and Paccaud, F	The cost effectiveness of pharmacological smoking cessation therapies in developing countries: a case study in the Seychelles	Tobacco Control	2004	13	190-5			OBJECTIVE: To examine the incremental cost effectiveness of the five first line pharmacological smoking cessation therapies in the Seychelles and other developing countries.;DESIGN: A Markov chain cohort simulation.;SUBJECTS: Two simulated cohorts of smokers: (1) a reference cohort given physician counselling only; (2) a treatment cohort given counselling plus cessation therapy.;INTERVENTION: Add…
Gingrich, CD, Hanson, K, Marchant, T, Mulligan, JA and Mponda, H	Price subsidies and the market for mosquito nets in developing countries: A study of Tanzania's discount voucher scheme	Social Science & Medicine	2011	73	160-8			This study uses a partial equilibrium simulation model to explore how price subsidies for insecticide-treated mosquito nets (ITNs) affect households' purchases of ITNs. The model describes the ITN market in a typical developing country and is applied to the situation in Tanzania, where the Tanzania National Voucher Scheme (TNVS) provides a targeted subsidy to vulnerable population groups by means…
Ginsberg, GM, Lauer, JA, Zelle, S, Baeten, S and Baltussen, R	Cost effectiveness of strategies to combat breast, cervical, and colorectal cancer in sub-Saharan Africa and South East Asia: mathematical modelling study	Bmj	2012	344	e614			OBJECTIVE: To determine the costs and health effects of interventions to combat breast, cervical, and colorectal cancers in order to guide resource allocation decisions in developing countries.;SETTING: Two World Health Organization sub-regions of the world: countries in sub-Saharan Africa with very high adult and high child mortality (AfrE); and countries in South East Asia with high adult and h…
Goldie, SJ	Health economics and cervical cancer prevention: a global perspective	Virus Research	2002	89	301-9			Recent scientific advances are providing an opportunity to revisit strategies for cervical cancer prevention. How to invest health resources wisely, such that clinical benefits are maximized-and opportunity costs are minimized-is a critical question in the setting of new technology. In addition to an intervention's effectiveness, public health decision-making requires consideration of its feasibi…
Goldie, SJ, Diaz, M, Constenla, D, Alvis, N, Andrus, JK and Kim, SY	Mathematical models of cervical cancer prevention in Latin America and the Caribbean	Vaccine	2008	26 Suppl 11	L59-72			Using population and epidemiologic data for 33 countries in Latin America and the Caribbean (LAC), a model-based approach estimated averted cervical cancer cases and deaths, disability-adjusted life years (DALYs) and incremental cost-effectiveness ratios (I$/DALY averted) for human papillomavirus (HPV) vaccination of young adolescent girls. Absolute reduction in lifetime cancer risk varied betwee…
Goldie, SJ, Diaz, M, Kim, SY, Levin, CE, Van Minh, H and Kim, JJ	Mathematical models of cervical cancer prevention in the Asia Pacific region	Vaccine	2008	26 Suppl 12	M17-29			Using population-based and epidemiologic data for 25 countries in Asia (22 GAVI-Alliance eligible countries, Thailand, China and Japan), a model-based approach was used to estimate averted cervical cancer cases and deaths, disability-adjusted life years (DALYs) and incremental cost-effectiveness ratios (I$/DALY averted) for vaccination of young adolescent girls against human papillomavirus (HPV) …
Goldie, SJ, Gaffikin, L, Goldhaber-Fiebert, JD, Gordillo-Tobar, A, Levin, C, Mah√©, C and Wright, TC	Cost-effectiveness of cervical-cancer screening in five developing countries	New England Journal of Medicine	2005	353	2158-2168			BACKGROUND: Cervical-cancer screening strategies that involve the use of conventional cytology and require multiple visits have been impractical in developing countries. METHODS: We used computer-based models to assess the cost-effectiveness of a variety of cervical-cancer screening strategies in India, Kenya, Peru, South Africa, and Thailand. Primary data were combined with data from the literat…
Goldie, SJ, Kim, JJ, Kobus, K, Goldhaber-Fiebert, JD, Salomon, J, O'Shea M, K, Xavier Bosch, F, de Sanjose, S and Franco, EL	Cost-effectiveness of HPV 16, 18 vaccination in Brazil	Vaccine	2007	25	6257-70			We use an empirically calibrated model to estimate the cost-effectiveness of cervical cancer prevention in Brazil, a country with a high cervical cancer burden. Assuming 70% coverage, HPV 16, 18 vaccination of adolescent girls is expected to reduce the lifetime risk of cancer by approximately 42.7% (range, 33.2-53.5%); screening three times per lifetime is expected to reduce risk by 21.9-30.7% de…
Goldie, SJ, Kuhn, L, Denny, L, Pollack, A and Wright, TC	Policy analysis of cervical cancer screening strategies in low-resource settings: clinical benefits and cost-effectiveness	Jama	2001	285	3107-15			CONTEXT: Cervical cancer is a leading cause of cancer-related death among women in developing countries. In such low-resource settings, cytology-based screening is difficult to implement, and less complex strategies may offer additional options.;OBJECTIVE: To assess the cost-effectiveness of several cervical cancer screening strategies using population-specific data.;DESIGN AND SETTING: Cost-effe…
Goldie, SJ, Levin, C, Mosqueira-Lov√≥n, NR, Ortendahl, J, Kim, J, O'Shea, M, Diaz Sanchez, M and Mendoza Araujo, MA	Health and economic impact of human papillomavirus 16 and 18 vaccination of preadolescent girls and cervical cancer screening of adult women in Peru	Revista Panamericana de Salud Publica/Pan American Journal of Public Health	2012	32	426-434			Objective. To estimate the benefits, cost-effectiveness (i.e., value for money), and required financial costs (e.g., affordability) of adding human papillomavirus (HPV) vaccination to Peru's cervical cancer screening program. Methods. Evidence (e.g., coverage, delivery costs) from an HPV vaccination demonstration project conducted in Peru was combined with epidemiological data in an empirically c…
Goldie, SJ, Sweet, S, Carvalho, N, Natchu, UCM and Hu, D	Alternative strategies to reduce maternal mortality in India: A cost-effectiveness analysis	PLoS Medicine	2010	7				Background: Approximately one-quarter of all pregnancy-and delivery-related maternal deaths worldwide occur in India. Taking into account the costs, feasibility, and operational complexity of alternative interventions, we estimate the clinical and population-level benefits associated with strategies to improve the safety of pregnancy and childbirth in India. Methods and Findings: Country-and regi…
Goldie, SJ, Yazdanpanah, Y, Losina, E, Weinstein, MC, Anglaret, X, Walensky, RP, Hsu, HE, Kimmel, A, Holmes, C, Kaplan, JE and Freedberg, KA	Cost-effectiveness of HIV treatment in resource-poor settings - The case of C√¥te d'Ivoire	New England Journal of Medicine	2006	355	1141-1153			Background: As antiretroviral therapy is increasingly used in settings with limited resources, key questions about the timing of treatment and use of diagnostic tests to guide clinical decisions must be addressed. Methods: We assessed the cost-effectiveness of treatment strategies for a cohort of adults in C√¥te d'Ivoire who were infected with the human immunodeficiency virus (HIV) (mean age, 33 …
Gomez, GB, Borquez, A, Caceres, CF, Segura, ER, Grant, RM, Garnett, GP and Hallett, TB	The potential impact of pre-exposure prophylaxis for HIV prevention among men who have sex with men and transwomen in Lima, Peru: a mathematical modelling study	PLoS Medicine / Public Library of Science	2012	9	e1001323			BACKGROUND: HIV pre-exposure prophylaxis (PrEP), the use of antiretroviral drugs by uninfected individuals to prevent HIV infection, has demonstrated effectiveness in preventing acquisition in a high-risk population of men who have sex with men (MSM). Consequently, there is a need to understand if and how PrEP can be used cost-effectively to prevent HIV infection in such populations.;METHODS AND …
Gomez, JA, Tirado, JC, Navarro Rojas, AA, Castrejon Alba, MM and Topachevskyi, O	Cost-effectiveness and cost utility analysis of three pneumococcal conjugate vaccines in children of Peru	BMC Public Health	2013	13	1025			BACKGROUND: The clinical and economic burden associated with invasive and non-invasive pneumococcal and non-typeable Haemophilus influenzae (NTHi) diseases is substantial in the Latin America and Caribbean region, where pneumococcal vaccines have only been introduced to a few countries. This study analyzed the cost-effectiveness and cost utility of three different pneumococcal conjugate vaccines …
Gonzalez, JC, Walker, JH and Einarson, TR	Cost-of-illness study of type 2 diabetes mellitus in Colombia	Pan American Journal of Public Health	2009	26	55-63			OBJECTIVE: To determine the per patient and overall cost of illness of type 2 diabetes mellitus (T2DM) in Colombia from Ministry of Health and societal perspectives.;METHODS: A published Markov transition model was adapted for Colombia, using the clinical expertise of a Colombian endocrinologist. Transition probabilities for the model were derived from an international literature review. A model …
Gonz√°lez-Mari√±o, MA	Evaluating the usefulness of a breast screening program in Bogot√°, Colombia	Revista de Salud Publica	2012	14	41-52			Objective Using a simulation model for evaluating the usefulness of an organized breast cancer screening program in Bogot√°, Colombia Material and methods The Markov model was used for designing a cost-effectiveness analysis; this was compared to a biennial breast cancer screening for women aged 50 to 69 years old. The disease's natural history, breast screening studies and publications concernin…
Goodman, CA, Coleman, PG and Mills, AJ	Changing the first line drug for malaria treatment - Cost-effectiveness analysis with highly uncertain inter-temporal trade-offs	Health Economics	2001	10	731-749			Access to effective treatment would substantially reduce the burden of malaria in sub-Saharan Africa, but resistance to chloroquine, the most commonly used first line drug, is now widespread. There has been considerable debate over the level of chloroquine resistance at which a new first line drug should be adopted. Two issues make this an extremely complex decision: it involves trade-offs in cos…
Govella, NJ, Okumu, FO and Killeen, GF	Insecticide-treated nets can reduce malaria transmission by mosquitoes which feed outdoors	American Journal of Tropical Medicine & Hygiene	2010	82	415-9			Insecticide treated nets (ITNs) represent a powerful means for controlling malaria in Africa because the mosquito vectors feed primarily indoors at night. The proportion of human exposure that occurs indoors, when people are asleep and can conveniently use ITNs, is therefore very high. Recent evidence suggests behavioral changes by malaria mosquito populations to avoid contact with ITNs by feedin…
Grais, RF, Conlan, AJ, Ferrari, MJ, Djibo, A, Le Menach, A, Bjornstad, ON and Grenfell, BT	Time is of the essence: exploring a measles outbreak response vaccination in Niamey, Niger	Journal of the Royal Society Interface	2008	5	67-74			The current World Health Organization recommendations for response during measles epidemics focus on case management rather than outbreak response vaccination (ORV) campaigns, which may occur too late to impact morbidity and mortality and have a high cost per case prevented. Here, we explore the potential impact of an ORV campaign conducted during the 2003-2004 measles epidemic in Niamey, Niger. …
Granich, RM, Gilks, CF, Dye, C, De Cock, KM and Williams, BG	Universal voluntary HIV testing with immediate antiretroviral therapy as a strategy for elimination of HIV transmission: a mathematical model	Lancet	2009	373	48-57			BACKGROUND: Roughly 3 million people worldwide were receiving antiretroviral therapy (ART) at the end of 2007, but an estimated 6.7 million were still in need of treatment and a further 2.7 million became infected with HIV in 2007. Prevention efforts might reduce HIV incidence but are unlikely to eliminate this disease. We investigated a theoretical strategy of universal voluntary HIV testing and…
Gray, RH, Li, X, Kigozi, G, Serwadda, D, Nalugoda, F, Watya, S, Reynolds, SJ and Wawer, M	The impact of male circumcision on HIV incidence and cost per infection prevented: a stochastic simulation model from Rakai, Uganda	Aids	2007	21	845-50			OBJECTIVES: To estimate the impact of male circumcision on HIV incidence, the number of procedures per HIV infection averted, and costs per infection averted.;METHODS: A stochastic simulation model with empirically derived parameters from a cohort in Rakai, Uganda was used to estimate HIV incidence, assuming that male circumcision reduced the risks of HIV acquisition with rate ratios (RR) ranging…
Gray, RH, Li, X, Wawer, MJ, Gange, SJ, Serwadda, D, Sewankambo, NK, Moore, R, Wabwire-Mangen, F, Lutalo, T and Quinn, TC	Stochastic simulation of the impact of antiretroviral therapy and HIV vaccines on HIV transmission; Rakai, Uganda	AIDS	2003	17	1941-1951			Objective: To model the effects of antiretroviral therapy (ART) and HIV vaccines on HIV transmission using empirical data from studies in Rakai, Uganda. Design: A stochastic simulation model estimated HIV incidence, probabilities of transmission per coital act and the reproductive number (R0) with ART and HIV vaccines. Model inputs included Rakai data on HIV transmission probabilities per coital …
Gray, RT, Heymer, KJ, Hoare, A, Kwon, JA, Thein, HH, Lote, N, Siba, P, Saramony, S, Saphonn, V, Worth, H, Kaldor, JM and Wilson, DP	What impact might the economic crisis have on HIV epidemics in Southeast Asia?	Current HIV Research	2009	7	656-65			OBJECTIVE: To evaluate the potential impact of the current global economic crisis (GEC) on the spread of HIV.;DESIGN: To evaluate the impact of the economic downturn we studied two distinct HIV epidemics in Southeast Asia: the generalized epidemic in Cambodia where incidence is declining and the epidemic in Papua New Guinea (PNG) which is in an expansion phase.;METHODS: Major HIV-related risk fac…
Gray, RT, Zhang, L, Lupiwa, T and Wilson, DP	Forecasting the population-level impact of reductions in HIV antiretroviral therapy in Papua new guinea	AIDS Research and Treatment	2011	2011				Papua New Guinea (PNG) recently did not secure external funding for the continuation of its antiretroviral treatment (ART) programs meaning that supplies of HIV drugs for the estimated 38,000 people living with HIV in PNG could be completely depleted during 2010. Using a mathematical model of HIV transmission calibrated to available HIV epidemiology data from PNG, we evaluated the expected popula…
Griffin, JT, Hollingsworth, TD, Okell, LC, Churcher, TS, White, M, Hinsley, W, Bousema, T, Drakeley, CJ, Ferguson, NM, Bas√°√±ez, MG and Ghani, AC	Reducing Plasmodium falciparum malaria transmission in Africa: A model-based evaluation of intervention strategies	PLoS Medicine	2010	7				Background:Over the past decade malaria intervention coverage has been scaled up across Africa. However, it remains unclear what overall reduction in transmission is achievable using currently available tools. Methods and Findings:We developed an individual-based simulation model for Plasmodium falciparum transmission in an African context incorporating the three major vector species (Anopheles g…
Griffin, P, Minarcine, C, Scherrer, C and Yan, I	Reducing TB incidence in clinical settings in resource constrained countries	61st Annual Conference and Expo of the Institute of Industrial Engineers, May 21, 2011 - May 25, 2011	2011			Reno, NV	Institute of Industrial Engineers	With the emergence of multidrug (MDR) and extensively drug (XDR) resistant tuberculosis (TB) and the devastating effect of TB in general, healthcare providers in resource constrained countries are struggling to find cost-effective ways to reduce incidence. These countries have an additional burden of significant HIV infected populations, which are especially susceptible to the disease. With input…
Griffiths, UK, Clark, A and Hajjeh, R	Cost-effectiveness of Haemophilus influenzae type b conjugate vaccine in low- and middle-income countries: regional analysis and assessment of major determinants	Journal of Pediatrics	2013	163	S50-S59.e9			OBJECTIVES: To estimate the cost-effectiveness of Haemophilus influenzae type b (Hib) conjugate vaccine in low- and middle-income countries and identify the model variables, which are most important for the result.;STUDY DESIGN: A static decision tree model was developed to predict incremental costs and health impacts. Estimates were generated for 4 country groups: countries eligible for funding …
Griffiths, UK, Clark, A, Shimanovich, V, Glinskaya, I, Tursunova, D, Kim, L, Mosina, L, Hajjeh, R and Edmond, K	Comparative economic evaluation of Haemophilus influenzae type b vaccination in Belarus and Uzbekistan	PLoS ONE [Electronic Resource]	2011	6	e21472			BACKGROUND: Hib vaccine has gradually been introduced into more and more countries during the past two decades, partly due to GAVI Alliance support to low-income countries. However, since Hib disease burden is difficult to establish in settings with limited diagnostic capacities and since the vaccine continues to be relatively expensive, some Governments remain doubtful about its value leading to…
Griffiths, UK, Hutton, G and Das Dores Pascoal, E	The cost-effectiveness of introducing hepatitis B vaccine into infant immunization services in Mozambique	Health Policy & Planning	2005	20	50-9			OBJECTIVE: To estimate the cost-effectiveness of introducing hepatitis B vaccine into routine infant immunization services in Mozambique, which took place in the year 2001.;METHODS: A decision analytic model was used to estimate the impact of hepatitis B vaccination. This model was developed for the WHO to estimate the global burden of disease from hepatitis B. Cost data of vaccine delivery and m…
Griffiths, UK, Wolfson, LJ, Quddus, A, Younus, M and Hafiz, RA	Incremental cost-effectiveness of supplementary immunization activities to prevent neonatal tetanus in Pakistan	Bulletin of the World Health Organization	2004	82	643-51			OBJECTIVE: This study aimed to estimate the incremental cost-effectiveness of supplementary immunization activities to prevent neonatal tetanus in the Loralai district of Pakistan. The supplemental immunization activities were carried out in two phases during 2001-03.;METHODS: A state-transition model was used to estimate the effect of routine vaccination with tetanus toxoid as well as vaccinatio…
Groot, MT, Baltussen, R, Uyl-de Groot, CA, Anderson, BO and Hortobagyi, GN	Costs and health effects of breast cancer interventions in epidemiologically different regions of Africa, North America, and Asia	Breast Journal	2006	12 Suppl 1	S81-90			We estimated the costs and health effects of treating stage I, II, III, and IV breast cancer individually, of treating all stages, and of introducing an extensive cancer control program (treating all stages plus early stage diagnosis) in three epidemiologically different world regions--Africa, North America, and Asia. We developed a mathematical simulation model of breast cancer using the stage d…
Gu, W and Novak, RJ	Predicting the impact of insecticide-treated bed nets on malaria transmission: The devil is in the detail	Malaria Journal	2009	8				Background: Insecticide-treated bed nets (ITNs), including long-lasting insecticidal nets (LLINs), play a primary role in global campaigns to roll back malaria in tropical Africa. Effectiveness of treated nets depends on direct impacts on individual mosquitoes including killing and excite-repellency, which vary considerably among vector species due to variations in host-seeking behaviours. While …
Guanqun, L, Yamaki, H and Sheng, H	Mechanism Design Simulation for Healthcare Reform in China	Principles of Practice in Multi-Agent Systems. 12th International Conference, PRIMA 2009, 14-16 Dec. 2009	2009		534-41	Berlin, Germany	Springer-Verlag	We present a new insurance system for healthcare reform to meet the medical demand and alleviate the cost burden in China. China healthcare reform is complex where unlike most countries' uniform system; it has two branches: urban health insurance and new rural cooperative medical. The equity and efficiency of the two medical healthcare systems are discussed in this paper. We use multi-agent based…
Guedes, RA, Guedes, VM and Chaoubah, A	Cost-effectiveness comparison between non-penetrating deep sclerectomy and maximum-tolerated medical therapy for glaucoma within the Brazilian National Health System (SUS)	Arquivos Brasileiros de Oftalmologia	2012	75	11-5			PURPOSE: Non-penetrating deep sclerectomy (NPDS) has emerged as a viable option in the surgical management of open-angle glaucoma. Our aim is to assess the cost-effectiveness of NPDS and to compare it to maximum medical treatment in a 5-year follow-up.;METHODS: A decision analysis model was built. Surgical (NPDS) arm of the decision tree was observational (consecutive retrospective case series) a…
Guerra, RL, Dorman, SE, Luiz, RR and Conde, MB	Cost-effectiveness of routine diagnostic evaluation of pulmonary tuberculosis in a primary care unit in Brazil	International Journal of Tuberculosis & Lung Disease	2013	17	1336-40			SETTING: Primary health care unit in Rio de Janeiro City, Brazil.;OBJECTIVE: To estimate and compare the cost-effectiveness of strategies used for passive case finding of pulmonary tuberculosis (PTB) cases using tests available at the primary care level.;DESIGN: Data on PTB suspects were reviewed, and a decision model was developed using sputum smear microscopy and chest radiography (CXR) accordi…
Guerriero, C, Cairns, J, Perel, P, Shakur, H, Roberts, I and Collaborators, CT	Cost-Effectiveness Analysis of Administering Tranexamic Acid to Bleeding Trauma Patients Using Evidence from the CRASH-2 Trial	Plos One	2011	6	6			Objective:To assess the cost effectiveness of giving tranexamic acid (TXA) to bleeding trauma patients in low, middle and high income settings. Methods: The CRASH-2 trial showed that TXA administration reduces the risk of death in bleeding trauma patients with a small but statistically significant increase in non-intensive care stay. A Markov model was used to assess the cost effectiveness of TXA…
Guillermo Ariza, J, Thuresson, PO, Machnicki, G, Mungapen, L, Kraemer, M, Asukai, Y and Fernando Giraldo, L	The Cost-Effectiveness and Budget Impact of Introducing Indacaterol into the Colombian Health System	Value in Health Regional Issues	2012	1	165-171			Objectives: The main objectives were to estimate the cost-effectiveness and budget impact of indacaterol (a once-daily, long-acting-beta2-agonist) compared with 1) salmeterol/fluticasone, 2) formoterol/budesonide, and 3) tiotropium for the treatment of chronic obstructive pulmonary disease in Colombia. Methods: A Markov model was utilized to simulate the progressive course of chronic obstructive …
Guinness, L, Vickerman, P, Quayyum, Z, Foss, A, Watts, C, Rodericks, A, Azim, T, Jana, S and Kumaranayake, L	The cost-effectiveness of consistent and early intervention of harm reduction for injecting drug users in Bangladesh	Addiction	2010	105	319-28			AIMS: To assess the cost-effectiveness of the CARE-SHAKTI harm reduction intervention for injecting drug users (IDUs) over a 3-year period, the impact on the cost-effectiveness of stopping after 3 years and how the cost-effectiveness might vary with baseline human immunodeficiency virus (HIV) prevalence.;DESIGN: Economic cost data were collected from the study site and combined with impact estima…
Gul, M and Guneri, AF	A computer simulation model to reduce patient length of stay and to improve resource utilization rate in an emergency department service system	International Journal of Industrial Engineering : Theory Applications and Practice	2012	19	221-231			This paper presents a case study of a discrete-event simulation (DES) model of an emergency department (ED) unit in a regional university hospital in Turkey. In this paper emergency department operations of the hospital were modeled, analyzed and improved. The goal of the study is to reduce patient average length of stay (LOS) and to improve patient throughput and utilization of locations and hum…
Gundogar, E, Duran, FM, Canbolat, YB and Turkmen, A	Fuzzy organ allocation system for cadaveric kidney transplantation	Transplantation	2005	80	1648-1653			Background. The recipient selection decision for a cadaveric donor kidney is complex and based on multiple criteria, not only medical but also ethical and political criteria. Methods. In this study, we develop the Fuzzy Organ Allocation System (FORAS) to determine who among potential recipients receives a cadaveric kidney when it becomes available. FORAS balances various kidney allocation objecti…
Gunes, ED, Yaman, H, Cekyay, B and Verter, V	Matching patient and physician preferences in designing a primary care facility network	Journal of the Operational Research Society	2014	65	483-496			This paper introduces an integer programming model for planning primary care facility networks, which accounts for the interests of different stakeholders while maximizing access to health care. Physician allocation to health-care facilities is explicitly modelled, which allows consideration of physician incentives in the planning phase. An illustrative case study in the Turkish primary care syst…
Guo, M, Li, B, Wu, S and Song, J	Effectiveness of referral incentive policy: Exploring using queuing network model with blocking	8th International Conference on Service Systems and Service Management, ICSSSM'11	2011			Tianjin		Referral incentive policy plays a key role in Two-Level Healthcare Delivery System established in urban China by means of guiding more patients to choose Community Health Centers (CHC) as the first treatment. However, two important questions about this referral incentive policy have not been investigated yet, including Dose the referral incentive policy really work in the sense of guiding more pa…
Gupta, M, Prinja, S, Kumar, R and Kaur, M	Cost-effectiveness of Haemophilus influenzae type b (Hib) vaccine introduction in the universal immunization schedule in Haryana State, India	Health Policy & Planning	2013	28	51-61			OBJECTIVE: In India, Haemophilus influenzae type b (Hib) vaccine introduction in the universal immunization programme requires evidence of its potential health impact and cost-effectiveness, as it is a costly vaccine. Since childhood mortality, vaccination coverage and health service utilization vary across states, the cost-effectiveness of introducing Hib vaccine was studied in Haryana state.;ME…
Guzm√°n, NA and De La Hoz, F	Cost effectiveness of heptavalent pneumococcal conjugate vaccine in populations of high risk in Colombia	Colombia Medica	2010	41	315-322			Objective: To estimate the economic impact of the introduction of heptavalent pneumococcal conjugate vaccine (PCV-7) in high risk populations of Colombia. Methods: A full economic evaluation was done regarding potential introduction of PCV-7. A cost-effectiveness study from the perspective of the third payer was done using a Decision Model. The model considered two alternatives: with and without …
Hacimustafao«ßlu, M, √áelebi, S, Akin, L, A«ßin, M and Sevencan, F	Cost effectiveness of both (Monovalent and Pentavalent) rotavirus vaccines	Cocuk Enfeksiyon Dergisi	2013	7	13-20			Objective: Rotavirus (RV) infections constitute a substantial burden in Turkey, particularly in children under 5 years of age. RV vaccines are administered to infants by payment only,and no reimbursement is available. The first aim of this study is to evaluate the cost effectiveness of implementing a national basis monovalent or pentavalent RV vaccination program in target populations. Material a…
Hadavandi, E, Shavandi, H, Ghanbari, A and Abbasian-Naghneh, S	Developing a hybrid artificial intelligence model for outpatient visits forecasting in hospitals	Applied Soft Computing Journal	2012	12	700-711			Accurate forecasting of outpatient visits aids in decision-making and planning for the future and is the foundation for greater and better utilization of resources and increased levels of outpatient care. It provides the ability to better manage the ways in which outpatient's needs and aspirations are planned and delivered. This study presents a hybrid artificial intelligence (AI) model to develo…
Hadwan, M and Ayob, MB	An exploration study of nurse rostering practice at Hospital Universiti Kebangsaan Malaysia	2009 2nd Conference on Data Mining and Optimization, DMO 2009	2009		100-107	Bangi, Selangor		The Nurse Rostering Problem (NRP) is a task of assigning duties fairly among available nurses at healthcare organizations for specific periods of time defined as shifts. NRP belongs to NP-hard problems for which an optimal solution is difficult to be obtained. This paper reports on the practical nurse rostering problem and issues at Hospital Universiti Kebangsaan Malaysia (HUKM). A survey (questi…
Haidari, LA, Connor, DL, Wateska, AR, Brown, ST, Mueller, LE, Norman, BA, Schmitz, MM, Paul, P, Rajgopal, J, Welling, JS, Leonard, J, Chen, SI and Lee, BY	Augmenting transport versus increasing cold storage to improve vaccine supply chains	PLoS ONE [Electronic Resource]	2013	8	e64303			BACKGROUND: When addressing the urgent task of improving vaccine supply chains, especially to accommodate the introduction of new vaccines, there is often a heavy emphasis on stationary storage. Currently, donations to vaccine supply chains occur largely in the form of storage equipment.;METHODS: This study utilized a HERMES-generated detailed, dynamic, discrete event simulation model of the Nige…
Haidari, LA, Connor, DL, Wateska, AR, Brown, ST, Mueller, LE, Norman, BA, Schmitz, MM, Paul, P, Rajgopal, J, Welling, JS, Leonard, J, Claypool, EG, Weng, YT, Chen, SI and Lee, BY	Only adding stationary storage to vaccine supply chains may create and worsen transport bottlenecks	Journal of Public Health Management and Practice	2013	19	S65-S67			Although vaccine supply chains in many countries require additional stationary storage and transport capacity to meet current and future needs, international donors tend to donate stationary storage devices far more often than transport equipment. To investigate the impact of only adding stationary storage equipment on the capacity requirements of transport devices and vehicles, we used HERMES (H…
Hajialiafzali, H, Moss, JR and Mahmood, MA	Efficiency measurement for hospitals owned by the Iranian social security organisation	Journal of Medical Systems	2007	31	166-72			This study used Data Envelopment Analysis (DEA) to examine the relative efficiency of hospitals owned by the Iranian Social Security Organization, which is the second largest institutional source of hospital care in that country. Using data for the year 2002, 26 of the 53 hospitals were deemed to be efficient. Inefficient hospitals had an average score of 90%, implying a potential reduction in al…
Hallett, TB, Alsallaq, RA, Baeten, JM, Weiss, H, Celum, C, Gray, R and Abu-Raddad, L	Will circumcision provide even more protection from HIV to women and men? New estimates of the population impact of circumcision interventions	Sexually Transmitted Infections	2011	87	88-93			BACKGROUND: Mathematical modelling has indicated that expansion of male circumcision services in high HIV prevalence settings can substantially reduce population-level HIV transmission. However, these projections need revision to incorporate new data on the effect of male circumcision on the risk of acquiring and transmitting HIV.;METHODS: Recent data on the effect of male circumcision during wou…
Hallett, TB, Baeten, JM, Heffron, R, Barnabas, R, de Bruyn, G, Cremin, √ç, Delany, S, Garnett, GP, Gray, G, Johnson, L, McIntyre, J, Rees, H and Celum, C	Optimal uses of antiretrovirals for prevention in HIV-1 serodiscordant heterosexual couples in South Africa: A modelling study	PLoS Medicine	2011	8				Background: Antiretrovirals have substantial promise for HIV-1 prevention, either as antiretroviral treatment (ART) for HIV-1-infected persons to reduce infectiousness, or as pre-exposure prophylaxis (PrEP) for HIV-1-uninfected persons to reduce the possibility of infection with HIV-1. HIV-1 serodiscordant couples in long-term partnerships (one member is infected and the other is uninfected) are …
Hallett, TB, Dube, S, Cremin, √ç, Lopman, B, Mahomva, A, Ncube, G, Mugurungi, O, Gregson, S and Garnett, GP	The role of testing and counselling for HIV prevention and care in the era of scaling-up antiretroviral therapy	Epidemics	2009	1	77-82			Objective: HIV Testing and Counselling (TC) programmes are being scaled-up as part of efforts to provide universal access to antiretroviral treatment (ART). Methods and findings: Mathematical modelling of TC in Zimbabwe shows that if universal access is to be sustained, TC must include prevention counselling that enables behaviour change among infected and uninfected individuals. The predicted im…
Hallett, TB, Gregson, S, Dube, S and Garnett, GP	The impact of monitoring HIV patients prior to treatment in resource-poor settings: insights from mathematical modelling	PLoS Medicine / Public Library of Science	2008	5	e53			BACKGROUND: The roll-out of antiretroviral treatment (ART) in developing countries concentrates on finding patients currently in need, but over time many HIV-infected individuals will be identified who will require treatment in the future. We investigated the potential influence of alternative patient management and ART initiation strategies on the impact of ART programmes in sub-Saharan Africa.;…
Hallett, TB, Gregson, S, Dube, S, Mapfeka, ES, Mugurungi, O and Garnett, GP	Estimating the resources required in the roll-out of universal access to antiretroviral treatment in Zimbabwe	Sexually Transmitted Infections	2011	87	621-8			OBJECTIVES: To develop projections of the resources required (person-years of drug supply and healthcare worker time) for universal access to antiretroviral treatment (ART) in Zimbabwe.;METHODS: A stochastic mathematical model of disease progression, diagnosis, clinical monitoring and survival in HIV infected individuals.;FINDINGS: The number of patients receiving ART is determined by many factor…
Hallett, TB, Gregson, S, Lewis, JJC, Lopman, BA and Garnett, GP	Behaviour change in generalised HIV epidemics: Impact of reducing cross-generational sex and delaying age at sexual debut	Sexually Transmitted Infections	2007	83	i50-i54			Background: Sexual behavioural change is essential to prevent HIV infections in Africa and statistical analysis of risk factors at the individual-level may be used to design interventions. The importance of reducing cross-generational sex (young women having sex with older men) and delaying age at first sex on the spread of HIV at the population-level has been presumed but not scientifically inve…
Hallett, TB, Gregson, S, Mugurungi, O, Gonese, E and Garnett, GP	Assessing evidence for behaviour change affecting the course of HIV epidemics: a new mathematical modelling approach and application to data from Zimbabwe	Epidemics	2009	1	108-17			BACKGROUND: Determining whether interventions to reduce HIV transmission have worked is essential, but complicated by the potential for generalised epidemics to evolve over time without individuals changing risk behaviour. We aimed to develop a method to evaluate evidence for changes in risk behaviour altering the course of an HIV epidemic.;METHODS: We developed a mathematical model of HIV transm…
Hallett, TB, Singh, K, Smith, JA, White, RG, Abu-Raddad, LJ and Garnett, GP	Understanding the impact of male circumcision interventions on the spread of HIV in southern Africa	PLoS ONE [Electronic Resource]	2008	3	e2212			BACKGROUND: Three randomised controlled trials have clearly shown that circumcision of adult men reduces the chance that they acquire HIV infection. However, the potential impact of circumcision programmes--either alone or in combination with other established approaches--is not known and no further field trials are planned. We have used a mathematical model, parameterised using existing trial fi…
Hamers, RL, Sawyer, AW, Tuohy, M, Stevens, WS, Rinke de Wit, TF, Hill, AM and Consortium, A-A	Cost-effectiveness of laboratory monitoring for management of HIV treatment in sub-Saharan Africa: a model-based analysis	Aids	2012	26	1663-72			OBJECTIVE: To compare the cost-effectiveness of three different strategies for long-term monitoring of antiretroviral therapy (ART) failure and regimen switching in sub-Saharan Africa: a symptom-based approach, or monitoring of either CD4 cell counts or plasma viral load (pVL).;DESIGN: Markov model.;SETTING AND PARTICIPANTS: Hypothetical HIV-infected adult population who began first-line ART and …
Harper, PR, Sayyad, MG, de Senna, V, Shahani, AK, Yajnik, CS and Shelgikar, KM	A systems modelling approach for the prevention and treatment of diabetic retinopathy	European Journal of Operational Research	2003	150	81-91			Diabetic patients may suffer from a number of long-term complications. One such complication is the onset of diabetic retinopathy, which damages the eyes and can lead to blindness. We describe the use of a systems modeling approach for the progression of diabetic retinopathy that has been used for cost-effectiveness evaluations of various prevention and patient care options. The adopted framework…
Harper, PR and Shahani, AK	A decision support system for the care of HIV and AIDS patients in India	European Journal of Operational Research	2003	147	187-197			The spread of the HIV epidemic in India has been ferocious in recent years [World Health Organisation, 2000. Epidemiological Fact Sheet on HIV/AIDS and Sexually Transmitted Disease-India 2000 Update. WHO and UNAIDS publications. Available from www.who.int/emc-hiv/fact_sheets/pdfs/india_en.pdf] and if it continues along its present trajectory, the consequences will be truly disastrous. Designed fo…
Hecht, R and Gandhi, G	Demand forecasting for preventive AIDS vaccines: economic and policy dimensions	Pharmacoeconomics	2008	26	679-97			BACKGROUND: An AIDS vaccine could play a very significant role in reversing the HIV pandemic, saving millions of lives. For a vaccine to have such an impact, it must be widely available and adopted and taken up rapidly in the countries most affected. A demand-forecasting model provides a valuable tool that can guide R&D spending decisions and identify policy actions to help achieve these goals.;O…
Hickson, RI, Mercer, GN and Lokuge, KM	Sensitivity analysis of a model for tuberculosis	19th International Congress on Modelling and Simulation - Sustaining Our Future: Understanding and Living with Uncertainty, MODSIM2011, December 12, 2011 - December 16, 2011	2011		926-932	Perth, WA, Australia	Modelling and Simulation Society of	Tuberculosis (TB) is a growing problem worldwide, with an estimated third of the world's population currently infected. Of particular concern is the growing trend of dual epidemics of HIV and TB, with the associated multidrug-resistant TB (MDR-TB). Developed countries which had previously removed TB transmission from communities are being re-infected with the MDR-TB strains. In the USA, Centers f…
Hisakane, N, Kirinoki, M, Chigusa, Y, Sinuon, M, Socheat, D, Matsuda, H and Ishikawa, H	The evaluation of control measures against Schistosoma mekongi in Cambodia by a mathematical model	Parasitology International	2008	57	379-85			We constructed a mathematical model for the transmission of Schistosoma mekongi in Cambodia. The simulation of the model will be instrumental in planning schistosomiasis control measures. The model includes two definitive hosts, humans and dogs, as animal reservoirs. Dogs are recognized to play an important role in schistosomiasis transmission in Cambodia. For the purpose of dealing with age-spec…
Hladik, W, Musinguzi, J, Kirungi, W, Opio, A, Stover, J, Kaharuza, F, Bunnell, R, Kafuko, J and Mermin, J	The estimated burden of HIV/AIDS in Uganda, 2005-2010	Aids	2008	22	503-10			OBJECTIVES: To estimate the burden of HIV disease in Uganda and the effect of HIV/AIDS control programmes to mitigate it.;DESIGN: Mathematical modelling and projecting using surveillance and census data.;METHODS: Using antenatal clinic surveillance (1986-2002) and a recent population-based survey (2004-2005) data, we modelled the adult national HIV prevalence over time (1981-2004), and kept preva…
Hoare, A, Kerr, SJ, Ruxrungtham, K, Ananworanich, J, Law, MG, Cooper, DA, Phanuphak, P and Wilson, DP	Hidden drug resistant HIV to emerge in the era of universal treatment access in Southeast Asia	PLoS ONE [Electronic Resource]	2010	5	e10981			BACKGROUND: Universal access to first-line antiretroviral therapy (ART) for HIV infection is becoming more of a reality in most low and middle income countries in Asia. However, second-line therapies are relatively scarce.;METHODS AND FINDINGS: We developed a mathematical model of an HIV epidemic in a Southeast Asian setting and used it to forecast the impact of treatment plans, without second-li…
Hodel, EM, Kay, K, Hayes, DJ, Terlouw, DJ and Hastings, IM	Optimizing the programmatic deployment of the anti-malarials artemether-lumefantrine and dihydroartemisinin-piperaquine using pharmacological modelling	Lipids in Health and Disease	2014	13				Background: Successful programmatic use of anti-malarials faces challenges that are not covered by standard drug development processes. The development of appropriate pragmatic dosing regimens for low-resource settings or community-based use is not formally regulated, even though these may alter factors which can substantially affect individual patient and population level outcome, such as drug e…
Hoffmann, CJ, Lewis, JJ, Dowdy, DW, Fielding, KL, Grant, AD, Martinson, NA, Churchyard, GJ and Chaisson, RE	Mortality associated with delays between clinic entry and ART initiation in resource-limited settings: results of a transition-state model	Journal of Acquired Immune Deficiency Syndromes: JAIDS	2013	63	105-11			OBJECTIVE: To estimate the mortality impact of delay in antiretroviral therapy (ART) initiation from the time of entry into care.;DESIGN: A state-transition Markov process model. This technique allows for assessing mortality before and after ART initiation associated with delays in ART initiation among a general population of ART-eligible patients without conducting a randomized trial.;METHODS: W…
Hogan, DR, Baltussen, R, Hayashi, C, Lauer, JA and Salomon, JA	Cost effectiveness analysis of strategies to combat HIV/AIDS in developing countries	Bmj	2005	331	1431-7			OBJECTIVE: To assess the costs and health effects of a range of interventions for preventing the spread of HIV and for treating people with HIV/AIDS in the context of the millennium development goal for combating HIV/AIDS.;DESIGN: Cost effectiveness analysis based on an epidemiological model.;SETTING: Analyses undertaken for two regions classified using the WHO epidemiological grouping-Afr-E, cou…
Hogan, DR, Baltussen, R, Hayashi, C, Lauer, JA and Salomon, JA	Achieving the millennium development goals for health - Cost effectiveness analysis of strategies to combat HIV/AIDS in developing countries	British Medical Journal	2005	331	1431-1435			Objective To assess the costs and health effects of a range of interventions for preventing the spread of HIV and for treating people with HIV/AIDS in the context of the millennium development goal for combating HIV/AIDS. Design Cost effectiveness analysis based on an epidemiological model. Setting Analyses undertaken for two regions classified using the WHO epidemiological grouping-Afr-E, countr…
Holmes, CB, Zheng, H, Martinson, NA, Freedberg, KA and Walensky, RP	Optimizing treatment for HIV-infected South African women exposed to single-dose nevirapine: balancing efficacy and cost	Clinical Infectious Diseases	2006	42	1772-80			INTRODUCTION: Nevirapine (NVP) resistance may decrease the effectiveness of viral suppression with NVP-based antiretroviral therapy (ART) in women infected with human immunodeficiency virus (HIV) with previous exposure to single-dose NVP. However, the alternative lopinavir-ritonavir-based ART regimen is more expensive. Our objectives were to project the tradeoffs regarding life expectancy, cost, …
Hontelez, JA, Nagelkerke, N, Barnighausen, T, Bakker, R, Tanser, F, Newell, ML, Lurie, MN, Baltussen, R and de Vlas, SJ	The potential impact of RV144-like vaccines in rural South Africa: a study using the STDSIM microsimulation model	Vaccine	2011	29	6100-6			BACKGROUND: The only successful HIV vaccine trial to date is the RV144 trial of the ALVAC/AIDSVAX vaccine in Thailand, which showed an overall incidence reduction of 31%. Most cases were prevented in the first year, suggesting a rapidly waning efficacy. Here, we predict the population level impact and cost-effectiveness of practical implementation of such a vaccine in a setting of a generalised e…
Hontelez, JAC, De Vlas, SJ, Baltussen, R, Newell, ML, Bakker, R, Tanser, F, Lurie, M and B√§rnighausen, T	The impact of antiretroviral treatment on the age composition of the HIV epidemic in sub-Saharan Africa	AIDS	2012	26	S19-S30			Introduction: Antiretroviral treatment (ART) coverage is rapidly expanding in sub-Saharan Africa (SSA). Based on the effect of ART on survival of HIV-infected people and HIV transmission, the age composition of the HIV epidemic in the region is expected to change in the coming decades. We quantify the change in the age composition of HIV-infected people in all countries in SSA. Methods: We used S…
Hontelez, JAC, Lurie, MN, B√§rnighausen, T, Bakker, R, Baltussen, R, Tanser, F, Hallett, TB, Newell, ML and de Vlas, SJ	Elimination of HIV in South Africa through Expanded Access to Antiretroviral Therapy: A Model Comparison Study	PLoS Medicine	2013	10				Background:Expanded access to antiretroviral therapy (ART) using universal test and treat (UTT) has been suggested as a strategy to eliminate HIV in South Africa within 7 y based on an influential mathematical modeling study. However, the underlying deterministic model was criticized widely, and other modeling studies did not always confirm the study's finding. The objective of our study is to be…
Hontelez, JAC, Lurie, MN, Newell, ML, Bakker, R, Tanser, F, B√§rnighausen, T, Baltussen, R and De Vlas, SJ	Ageing with HIV in South Africa	AIDS	2011	25	1665-1667			We used an established microsimulation model, quantified to a rural South African setting with a well developed antiretroviral treatment programme, to predict the impact of antiretroviral therapy on the HIV epidemic in the population aged over 50 years. We show that the HIV prevalence in patients aged over 50 years will nearly double in the next 30 years, whereas the fraction of HIV-infected pati…
Horvath, LZ, Forgacs, V, Bodnar, B and van Loon, J	Health economic impact of recFSH (Puregon((R))) in IVF	17th World Congress on Fertility and Sterility	2001		121-126	Melbourne, Australia		The objective of the study was to estimate the cost effectiveness of follitropin beta (Puregon(R); Organon) and urofollitropin (Metrodin HP(R); Serono) in women undergoing in vitro fertilization (IVF) treatment in Hungary. A Markov model was designed using clinical data from a large metaanalysis of IVF treatment and expert opinion on IVF patterns acquired from IVF centers in Hungary. The study wa…
Hotchkiss, DR, Krasovec, K, El-Idrissi, MD, Eckert, E and Karim, AM	The role of user charges and structural attributes of quality on the use of maternal health services in Morocco	International Journal of Health Planning & Management	2005	20	113-35			Health care decision makers in settings with low levels of utilization of primary services are faced with the challenge of balancing the sometimes competing goals of increasing coverage and utilization of maternity services, particularly among the poor, with that of ensuring the financial viability of the health system. Morocco is a case in point where this policy dilemma is currently being playe…
Hou, Q, Jin, Z and Ruan, S	Dynamics of rabies epidemics and the impact of control efforts in Guangdong Province, China	Journal of Theoretical Biology	2012	300	39-47			Rabies is a major public health problem in some developing countries including China. One of the reasons is that there is a very large number of dogs, both domestic and stray, especially in Guangdong Province which has the third most rabies cases (after Guangxi and Hunan) among the 31 provinces, autonomous regions and municipalities in Mainland China, and at least 18.2% of the human rabies cases …
Hou, Q, Sun, X, Zhang, J, Liu, Y, Wang, Y and Jin, Z	Modeling the transmission dynamics of sheep brucellosis in Inner Mongolia Autonomous Region, China	Mathematical Biosciences	2013	242	51-8			Brucellosis is one of the major zoonotic diseases in China, especially in Inner Mongolia where occurs the largest number of human brucellosis cases of Mainland China, which can be attributed to the large number of sheep kept there, since at least 90% of the human brucellosis cases are caused by sheep. Therefore, given the characteristics of the brucellosis infection in Inner Mongolia Autonomous R…
Houben, RM, Sumner, T, Grant, AD and White, RG	Ability of preventive therapy to cure latent Mycobacterium tuberculosis infection in HIV-infected individuals in high-burden settings	Proceedings of the National Academy of Sciences of the United States of America	2014	111	5325-30			Trials of isoniazid preventive therapy (IPT) for people living with HIV in southern Africa have shown high rates of tuberculosis disease immediately after cessation of therapy. This could be due to the lack of cure following preventive therapy or reinfection with rapid progression to disease. Using a model fitted to trial data, we estimate the degree to which preventive therapies cure latent Myco…
Hove-Musekwa, SD, Nyabadza, F and Mambili-Mamboundou, H	Modelling hospitalization, home-based care, and individual withdrawal for people living with HIV/AIDS in high prevalence settings	Bulletin of Mathematical Biology	2011	73	2888-915			In sub-Saharan Africa, the model of care for people who are living with HIV/AIDS has changed from hospital care to home-based care. In this paper, a mathematical model describing the dynamics of HIV transmission, hospitalization, and home-based care is constructed and analysed. The model reproduction number R(e) is determined and discussed. The equilibria are determined and analysed in terms of R…
Howie, SR, Hill, S, Ebonyi, A, Krishnan, G, Njie, O, Sanneh, M, Jallow, M, Stevens, W, Taylor, K, Weber, MW, Njai, PC, Tapgun, M, Corrah, T, Mulholland, K, Peel, D, Njie, M, Hill, PC and Adegbola, RA	Meeting oxygen needs in Africa: an options analysis from the Gambia	Bulletin of the World Health Organization	2009	87	763-71			OBJECTIVE: To compare oxygen supply options for health facilities in the Gambia and develop a decision-making algorithm for choosing oxygen delivery systems in Africa and the rest of the developing world.;METHODS: Oxygen cylinders and concentrators were compared in terms of functionality and cost. Interviews with key informants using locally developed and adapted WHO instruments, operational asse…
Hoyos, MC, Morales, RS and Akhavan-Tabatabaei, R	Modeling the inclusion of trapped victims in logistics planning for earthquake response: A case study in the city of Bogot√°	2013 43rd Winter Simulation Conference - Simulation: Making Decisions in a Complex World, WSC 2013	2013		2487-2495	Washington, DC		Discrete Event Simulation (DES) has been commonly used in modeling the medical attention of injured people. In earthquakes, a portion of the injured victims are trapped and need to be rescued before receiving medical attention. Hence, the rate of rescue operations and the percentage of victims that are rescued have an impact on the logistics planning of medical attention. In this paper we attempt…
Hsieh, YH, Wang, YS, de Arazoza, H and Lounes, R	Modeling secondary level of HIV contact tracing: its impact on HIV intervention in Cuba	BMC Infectious Diseases	2010	10	194			BACKGROUND: Universal HIV testing/treatment program has currently been suggested and debated as a useful strategy for elimination of HIV epidemic in Africa, although not without practical issues regarding the costs and feasibility of a fully implemented program.;METHODS: A mathematical model is proposed which considers two levels of detection of HIV-infectives through contact tracing of known inf…
Hu, D, Bertozzi, SM, Gakidou, E, Sweet, S and Goldie, SJ	The costs, benefits, and cost-effectiveness of interventions to reduce maternal morbidity and mortality in Mexico	PLoS ONE [Electronic Resource]	2007	2	e750			BACKGROUND: In Mexico, the lifetime risk of dying from maternal causes is 1 in 370 compared to 1 in 2,500 in the U.S. Although national efforts have been made to improve maternal services in the last decade, it is unclear if Millennium Development Goal 5--to reduce maternal mortality by three-quarters by 2015--will be met.;METHODOLOGY/PRINCIPAL FINDINGS: We developed an empirically calibrated mod…
Hu, D, Grossman, D, Levin, C, Blanchard, K, Adanu, R and Goldie, SJ	Cost-effectiveness analysis of unsafe abortion and alternative first-trimester pregnancy termination strategies in Nigeria and Ghana	African Journal of Reproductive Health	2010	14	85-103			To explore the policy implications of increasing access to safe abortion in Nigeria and Ghana, we developed a computer-based decision analytic model which simulates induced abortion and its potential complications in a cohort of women, and comparatively assessed the cost-effectiveness of unsafe abortion and three first-trimester abortion modalities: hospital-based dilatation and curettage, hospit…
Hu, D, Grossman, D, Levin, C, Blanchard, K and Goldie, SJ	Cost-effectiveness analysis of alternative first-trimester pregnancy termination strategies in Mexico City	BJOG: An International Journal of Obstetrics and Gynaecology	2009	116	768-779			Please cite this paper as: Hu D, Grossman D, Levin C, Blanchard K, Goldie S. Cost-effectiveness analysis of alternative first-trimester pregnancy termination strategies in Mexico City. BJOG 2009;116:768-779.Objective To assess the comparative health and economic outcomes associated with three alternative first-trimester abortion techniques in Mexico City and to examine the policy implications of …
Hu, ZH and Sheu, JB	Post-disaster debris reverse logistics management under psychological cost minimization	Transportation Research Part B: Methodological	2013	55	118-141			This work presents a novel reverse logistics system for post-disaster debris. Effectiveness of the proposed system is demonstrated by applying it to a case study in Wenchuan County of China. The county was the epicenter of the Wenchuan earthquake on May 12, 2008. A multi-objective linear programming model is also formulated capable of systematically minimizing total reverse logistical costs, corr…
Huang, LH, Zhang, L, Tobe, RYG, Qi, FH, Sun, L, Teng, Y, Ke, QL, Mai, F, Zhang, XF, Zhang, M, Yang, RL, Tu, L, Li, HH, Gu, YQ, Xu, SN, Yue, XY, Li, XD, Qi, BE, Cheng, XH, Tang, W, Xu, LZ and Han, DM	Cost-effectiveness analysis of neonatal hearing screening program in china: Should universal screening be prioritized?	BMC Health Services Research	2012	12				Background: Neonatal hearing screening (NHS) has been routinely offered as a vital component of early childhood care in developed countries, whereas such a screening program is still at the pilot or preliminary stage as regards its nationwide implementation in developing countries. To provide significant evidence for health policy making in China, this study aims to determine the cost-effectivene…
Huang, S-C, Liu, D-C and Lu, Z-F	Measuring efficiency of hand surgery departments using Data Envelopment Analysis(DEA)	17th International Conference on Industrial Engineering and Engineering Management, IE and EM2010, October 29, 2010 - October 31, 2010	2010		1189-1193	Xiamen, China	IEEE Computer Society	This paper developed an approach based on data envelopment analysis(DEA) including CCR, BCC and FG models to evaluate the performance of hand surgery departments. Concerning the characteristics of hand surgery, the design of decision making unit(DMU) with 3 input indexes and 3 output indexes were conducted through the communication tool of IDEFO. Five sets of muti-index criteria were introduced t…
Huang, Y	Modeling the Severe Acute Respiratory Syndrome (SARS) Outbreak in Beijing - An agent-based approach	1st International Conference and Exhibition on Computing for Geospatial Research and Application, COM.Geo 2010, June 21, 2010 - June 23, 2010	2010			Washington, DC, United states	Association for Computing Machinery	The spread of Severe Acute Respiratory Syndrome (SARS) is an intrinsic spatial and temporal process. This paper reports the use of an agent-based approach to model the spread of SARS in Beijing and to examine the effectiveness of intervention strategies. A case study of simulation of SARS epidemic in Beijing, China in 2003 has been conducted by tracing close contacts of cases. Based on comparison…
Hubacher, D, Mavranezouli, I and McGinn, E	Unintended pregnancy in sub-Saharan Africa: magnitude of the problem and potential role of contraceptive implants to alleviate it	Contraception	2008	78	73-8			BACKGROUND: Unintended pregnancies continue to burden many countries in sub-Saharan Africa. Our aim was to estimate the number of unintended pregnancies in the region and model the impact of expanding use of contraceptive implants at the expense of short-term hormonal birth control methods.;STUDY DESIGN: For the 42 countries in mainland sub-Saharan Africa, we estimated current levels of unintende…
Hunchangsith, P, Barendregt, JJ, Vos, T and Bertram, M	Cost-effectiveness of various tuberculosis control strategies in Thailand	Value in Health	2012	15	S50-5			OBJECTIVE: To evaluate the cost-effectiveness of different tuberculosis control strategies in Thailand.;METHODS: Different tuberculosis control strategies, which included health-worker, community-member, and family-member directly observed treatment (DOT) and a mobile phone "contact-reminder" system, were compared with self-administered treatment (SAT). Cost-effectiveness analysis was undertaken …
Hussaini, N, Winter, M and Gumel, AB	Qualitative assessment of the role of public health education program on HIV transmission dynamics	Mathematical Medicine and Biology-a Journal of the Ima	2011	28	245-270			This paper presents a non-linear deterministic model for assessing the impact of public health education campaign on curtailing the spread of the human immunodeficiency virus (HIV) pandemic in a population. Rigorous qualitative analysis of the model reveals that it exhibits the phenomenon of backward bifurcation (BB), where a stable disease-free equilibrium coexists with a stable endemic equilibr…
Hutton, DW and Brandeau, ML	Too Much of a Good Thing? When to Stop Catch-Up Vaccination	Medical Decision Making	2013	33	920-936			During the 20th century, deaths from a range of serious infectious diseases decreased dramatically due to the development of safe and effective vaccines. However, infant immunization coverage has increased only marginally since the 1960s, and many people remain susceptible to vaccine-preventable diseases. Catch-up vaccination for age groups beyond infancy can be an attractive and effective means …
Hutton, DW, Brandeau, ML and So, SK	Doing good with good OR: Supporting cost-effective hepatitis B interventions	Interfaces	2011	41	289-300			In an era of limited health-care budgets, mathematical models can be useful tools to identify cost-effective programs and support policy makers in making informed decisions. This paper reports the results of our work, which we carried out over several years with the Asian Liver Center at Stanford University. Hepatitis B is a vaccine-preventable viral disease that, if untreated, can lead to death …
Hutton, DW, So, SK and Brandeau, ML	Cost-effectiveness of nationwide hepatitis B catch-up vaccination among children and adolescents in China	Hepatology	2010	51	405-14			UNLABELLED: Liver disease and liver cancer associated with childhood-acquired chronic hepatitis B are leading causes of death among adults in China. Despite expanded newborn hepatitis B vaccination programs, approximately 20% of children under age 5 years and 40% of children aged 5 to 19 years remain unprotected from hepatitis B. Although immunizing them will be beneficial, no studies have examin…
Iannoni, AP and Morabito, R	A multiple dispatch and partial backup hypercube queuing model to analyze emergency medical systems on highways	Transportation Research Part E: Logistics and Transportation Review	2007	43	755-771			The hypercube is a spatially distributed queuing model based on Markovian analysis approximations, used to analyze the configuration and operation of server-to-customer emergency systems. In the present study we adapted the model to analyze emergency medical systems (EMS) on highways, which operate within particular dispatching policies. The study takes into consideration that: the emergency call…
Insinga, RP, Dasbach, EJ, Elbasha, EH, Puig, A and Reynales-Shigematsu, LM	Cost-effectiveness of quadrivalent human papillomavirus (HPV) vaccination in Mexico: a transmission dynamic model-based evaluation	Vaccine	2007	26	128-39			We examined the potential health outcomes and cost-effectiveness of quadrivalent human papillomavirus (HPV) 6/11/16/18 vaccination strategies in the Mexican population using a multi-HPV type dynamic transmission model. Assuming similar cervical screening practices, with or without vaccination, we examined the incremental cost-effectiveness of vaccination strategies for 12 year-old females, with o…
Irlam, J, Mayosi, BM, Engel, M and Gaziano, TA	Primary prevention of acute rheumatic fever and rheumatic heart disease with penicillin in South African children with pharyngitis: a cost-effectiveness analysis	Circulation	2013		343-51			BACKGROUND: Acute rheumatic fever and subsequent rheumatic heart disease remain significant in developing countries. We describe a cost-effective analysis of 7 strategies for the primary prevention of acute rheumatic fever and rheumatic heart disease in children presenting with pharyngitis in urban primary care clinics in South Africa.;METHODS AND RESULTS: We used a Markov model to assess the cos…
Ishikawa, N, Shimbo, T, Miyano, S, Sikazwe, I, Mwango, A, Ghidinelli, MN and Syakantu, G	Health Outcomes and Cost Impact of the New WHO 2013 Guidelines on Prevention of Mother-to-Child Transmission of HIV in Zambia	Plos One	2014	9	11			Background: Countries are currently progressing towards the elimination of new paediatric HIV infections by 2015. WHO published new consolidated guidelines in June 2013, which now recommend either 'Antiretroviral drugs (ARVs) for women living with HIV during pregnancy and breastfeeding (Option B)' or 'Lifelong antiretroviral therapy (ART) for all pregnant and breastfeeding women living with HIV (…
Ivanova, AD and Petrova, GI	Hypertension and common complications - Analysis of the ambulatory treatment cost	Central European Journal of Public Health	2009	17	223-230			Aim: Retrospective analysis of the prescribing practice and cost of ambulatory treatment of hypertension and its common complications - heart failure, sequelae of cerebrovascular disease, and angina pectoris. Methods: Analysis of 3,240 reimbursable ambulatory prescriptions for hypertension, heart failure, sequelae of cerebrovascular disease and angina pectoris according to the complexity of the t…
Jacquet, V, Morose, W, Schwartzman, K, Oxlade, O, Barr, G, Grimard, F and Menzies, D	Impact of DOTS expansion on tuberculosis related outcomes and costs in Haiti	BMC Public Health	2006	6	209			BACKGROUND: Implementation of the World Health Organization's DOTS strategy (Directly Observed Treatment Short-course therapy) can result in significant reduction in tuberculosis incidence. We estimated potential costs and benefits of DOTS expansion in Haiti from the government, and societal perspectives.;METHODS: Using decision analysis incorporating multiple Markov processes (Markov modelling),…
James, C, Morris, SS, Keith, R and Taylor, A	Impact on child mortality of removing user fees: simulation model	Bmj	2005	331	747-9			OBJECTIVE: To estimate how many child deaths might be prevented if user fees were removed in 20 African countries;DESIGN: Simulation model combining evidence on key health interventions' impacts on reducing child mortality with analysis of the effect of fee abolition on access to healthcare services.;RESULTS: Elimination of user fees could prevent approximately 233,000 (estimate range 153,000-305…
Jamom, M, Ayob, M and Hadwan, M	A greedy constructive approach for Nurse Rostering Problem	2011 3rd Conference on Data Mining and Optimization (DMO 2011), 28-29 June 2011	2011		227-31	Piscataway, NJ, USA	IEEE	Nurse Rostering Problem (NRP) concerns about producing a high quality workable duty roster for the available staff nurses. The aim of this work is to present a greedy constructive heuristic algorithm to generate a feasible initial solution by satisfying the hard constraints. Basically the initial solution includes three steps: first we start by designing a group of shift patterns based on hard an…
Javanbakht, M, Mirahmadizadeh, A and Mashayekhi, A	The long-term effectiveness of methadone maintenance treatment in prevention of hepatitis c virus among illicit drug users: A modeling study	Iranian Red Crescent Medical Journal	2014	16				Background: Chronic infection with hepatitis C virus (HCV) is increasingly recognized as a major global health problem. Illicit injection drug use is an important risk factor for the rising hepatitis C virus (HCV) prevalence in IR Iran. Objectives: The objective of this study was to determine the long-term effectiveness (total quality adjusted life years (QALYs) gained) of methadone maintenance t…
Jerbi, B and Kamoun, H	Multiobjective study to implement outpatient appointment system at Hedi Chaker Hospital	Simulation Modelling Practice and Theory	2011	19	1363-1370			The outpatient department at Hedi Chaker Hospital in Sfax, Tunisia, is currently using a block scheduling appointment whereby all patients are required to come at the beginning of the session. This brings about a tremendous waste of their time, creates congestion and puts further pressure on the medical staff. This paper evaluates a number of outpatient scheduling schemes based on the most recent…
Jeuland, MA and Pattanayak, SK	Benefits and costs of improved cookstoves: assessing the implications of variability in health, forest and climate impacts	PLoS ONE [Electronic Resource]	2012	7	e30338			Current attention to improved cook stoves (ICS) focuses on the "triple benefits" they provide, in improved health and time savings for households, in preservation of forests and associated ecosystem services, and in reducing emissions that contribute to global climate change. Despite the purported economic benefits of such technologies, however, progress in achieving large-scale adoption and use …
Johnson, LF, Bekker, LG and Dorrington, RE	HIV/AIDS vaccination in adolescents would be efficient and practical when vaccine supplies are limited	Vaccine	2007	25	7502-9			The first HIV/AIDS vaccines are likely to be expensive and limited in supply, and developing countries with generalized HIV/AIDS epidemics will need to distribute the limited vaccine stock in a manner that is both efficient and practical. This analysis compares seven strategies for distributing an HIV/AIDS vaccine in different South African sub-populations, using a mathematical model. If vaccinat…
Johnson, LF, Davies, MA, Moultrie, H, Sherman, GG, Bland, RM, Rehle, TM, Dorrington, RE and Newell, ML	The effect of early initiation of antiretroviral treatment in infants on pediatric AIDS mortality in South Africa: a model-based analysis	Pediatric Infectious Disease Journal	2012	31	474-80			BACKGROUND: Guidelines for treatment of pediatric HIV have recently changed to recommend that all infants who are identified as HIV-infected should start antiretroviral treatment (ART) immediately, regardless of their immunologic or clinical status. This study aims to assess the likely impact of this change in guideline in South Africa.;METHODS: A mathematical model was developed to simulate moth…
Johnson, LF and Dorrington, RE	Modelling the demographic impact of HIV/AIDS in South Africa and the likely impact of interventions	Demographic Research	2006	14	541-574			This paper describes an approach to incorporating the impact of HIV/AIDS and the effects of HIV/AIDS prevention and treatment programmes into a cohort component projection model of the South African population. The modelled HIV-positive population is divided into clinical and treatment stages, and it is demonstrated that the age profile and morbidity profile of the HIV-positive population is chan…
Johnson, LF, Stinson, K, Newell, ML, Bland, RM, Moultrie, H, Davies, MA, Rehle, TM, Dorrington, RE and Sherman, GG	The contribution of maternal HIV seroconversion during late pregnancy and breastfeeding to mother-to-child transmission of HIV	Journal of Acquired Immune Deficiency Syndromes: JAIDS	2012	59	417-25			BACKGROUND: The prevention of mother-to-child transmission (PMTCT) of HIV has been focused mainly on women who are HIV positive at their first antenatal visit, but there is uncertainty regarding the contribution to overall transmission from mothers who seroconvert after their first antenatal visit and before weaning.;METHOD: A mathematical model was developed to simulate changes in mother-to-chil…
Johnstone-Robertson, S, Lawn, SD, Welte, A, Bekker, LG and Wood, R	Tuberculosis in a South African prison - a transmission modelling analysis	South African Medical Journal	2011		809-13			BACKGROUND: Prisons are recognised internationally as institutions with very high tuberculosis (TB) burdens where transmission is predominantly determined by contact between infectious and susceptible prisoners. A recent South African court case described the conditions under which prisoners awaiting trial were kept. With the use of these data, a mathematical model was developed to explore the in…
Kacker, S, Frick, KD, Quinn, TC, Gray, RH and Tobian, AAR	Financial Implications of Male Circumcision Scale-Up for the Prevention of HIV and Other Sexually Transmitted Infections in a Sub-Saharan African Community	Sexually Transmitted Diseases	2013	40	559-568			Background: The financial implications of male circumcision ( MC) scale-up in sub-Saharan Africa associated with reduced HIV have been evaluated. However, no analysis has incorporated the expected reduction of a comprehensive set of other sexually transmitted infections including human papillomavirus, herpes simplex virus type 2, genital ulcer disease, bacterial vaginosis, and trichomoniasis. Met…
Kahn, JG, Jiwani, A, Gomez, GB, Hawkes, SJ, Chesson, HW, Broutet, N, Kamb, ML and Newman, LM	The Cost and Cost-Effectiveness of Scaling up Screening and Treatment of Syphilis in Pregnancy: A Model	Plos One	2014	9	10			Background: Syphilis in pregnancy imposes a significant global health and economic burden. More than half of cases result in serious adverse events, including infant mortality and infection. The annual global burden from mother-to-child transmission (MTCT) of syphilis is estimated at 3.6 million disability-adjusted life years (DALYs) and $309 million in medical costs. Syphilis screening and treat…
Kahn, JG, Marseille, E and Auvert, B	Cost-effectiveness of male circumcision for HIV prevention in a South African setting	PLoS Medicine / Public Library of Science	2006	3	e517			BACKGROUND: Consistent with observational studies, a randomized controlled intervention trial of adult male circumcision (MC) conducted in the general population in Orange Farm (OF) (Gauteng Province, South Africa) demonstrated a protective effect against HIV acquisition of 60%. The objective of this study is to present the first cost-effectiveness analysis of the use of MC as an intervention to …
Kaldor, JM and Wilson, DP	How low can you go: The impact of a modestly effective HIV vaccine compared with male circumcision	AIDS	2010	24	2573-2578			Objective: The first evidence of modest effectiveness of an HIV vaccine was demonstrated by the RV144 trial in Thailand in 2009. Although promising, this vaccine has largely been dismissed because it only had 30% efficacy. In contrast, male circumcision is widely supported and has approximately twice the efficacy, but can only be targeted to half of the population. We question the vaccine efficac…
Kato, M, Granich, R, Bui, DD, Tran, HV, Nadol, P, Jacka, D, Sabin, K, Suthar, AB, Mesquita, F, Lo, YR and Williams, B	The potential impact of expanding antiretroviral therapy and combination prevention in Vietnam: towards elimination of HIV transmission	Journal of Acquired Immune Deficiency Syndromes: JAIDS	2013	63	e142-9			BACKGROUND: Few studies have assessed the effects of antiretroviral therapy (ART) to prevent HIV transmission in Asian HIV epidemics. Vietnam has a concentrated HIV epidemic with the highest prevalence among people who inject drugs. We investigated the impact of expanded HIV testing and counseling (HTC) and early ART, combined with other prevention interventions on HIV transmission.;METHODS: A de…
Katrak, H	Measuring the shortage of medical practitioners in rural and urban areas in developing countries: A simple framework and simulation exercises with data from India	International Journal of Health Planning and Management	2008	23	93-105			This paper suggests a simple framework to estimate the shortage of medical practitioners in rural and urban areas in developing countries. Shortages are defined with respect to four main considerations. The overall numbers and also the different categories of practitioners in the rural and urban areas, the relatively greater difficulties of access in the rural areas (which reduce the number of ac…
Kawai, K, de Araujo, GTB, Fonseca, M, Pillsbury, M and Singhal, PK	Estimated health and economic impact of quadrivalent HPV (types 6/11/16/18) vaccination in Brazil using a transmission dynamic model	BMC Infectious Diseases	2012	12				Background: Cervical cancer is the second most common cancer among women in Brazil. We examined the health and economic impacts of quadrivalent HPV vaccination in Brazil.Methods: We adapted a previously developed transmission dynamic model to estimate the effectiveness of HPV vaccination on cervical cancer, cervical intraepithelial neoplasia grades 2 and 3 (CIN2/3), CIN1, and genital warts. We ev…
Kazanasmaz, ZT and Tayfur, G	Classifications for planimetric efficiency of nursing unit floors	Metu Journal of the Faculty of Architecture	2012	29	1-20			This trial study was conducted to determine classifications for planimetric design efficiency of sample public hospitals in Turkey by developing a fuzzy logic algorithm. Utilizing primary areas and circulation areas from nursing unit floor plans, the study employed triangular membership functions for the fuzzy subsets; Mamdani rule system; min operation for finding rule firing strength; max compo…
Keshtkaran, A, Javanbakht, M, Salavati, S, Mashayekhi, A, Karimi, M and Nuri, B	Cost-utility analysis of oral deferasirox versus infusional deferoxamine in transfusion-dependent beta-thalassemia patients	Transfusion	2013	53	1722-9			BACKGROUND: Deferasirox (DFX) is a novel iron chelator that has been shown to have similar efficacy and safety compared with deferoxamine (DFO) in patients with beta-thalassemia. The aim of this study was to determine the cost utility of DFX versus DFO in beta-thalassemia major patients from Iran's society perspective.;STUDY DESIGN AND METHODS: A Markov model has been developed to determine lifet…
Khalid, A and Scherrer, C	Alternatives for reducing the risk of transmission of tuberculosis in a typical hospital clinic in developing African countries	11th Annual Conference on Systems Engineering Research, CSER 2013	2013	16	853-862	Atlanta, GA		In this research, methods are explored to minimize the probability of the spread of airborne aerosols from an infected patient after a cough or sneeze. This work is focused on the spread of Tuberculosis. A hospital clinic is modeled using Computer Aided Design (CAD). The design is based on a typical clinic in a rural African country where resources are limited. The methods to help reduce the spre…
Khiewvan, B, Nopmaneejumruslers, C, Pusuwan, P, Tuchinda, P, Tojinda, N and Ubolnuch, K	Cost-effectiveness analysis of 18F-FDG PET/CT in detecting suspected recurrence or metastasis in well-differentiated thyroid carcinoma patients with negative diagnostic total body scan in Thailand: a decision analysis	Journal of the Medical Association of Thailand	2013	96	1350-64			OBJECTIVE: To evaluate cost-effectiveness analysis of 18F-FDG PET/CT to detect tumor recurrence or metastasis in well-differentiated thyroid cancer patients with high Tg but negative TBS in Thailand.;MATERIAL AND METHOD: A retrospective literature review of 55 studies published between 1978 and 2010 was done. Decision analysis by TreeAge program showed an evaluation of the most cost-effective tre…
Killeen, GE, McKenzie, FE, Foy, BD, Schieffelin, C, Billingsley, PE and Beier, JC	The potential impact of integrated malaria transmission control on entomologic inoculation rate in highly endemic areas	American Journal of Tropical Medicine and Hygiene	2000	62	545-551			We have used a relatively simple but accurate model for predicting the impact of integrated transmission control on the malaria entomologic inoculation rate (EIR) at four endemic sites from across sub-Saharan Africa and the southwest Pacific. The simulated campaign incorporated modestly effective vaccine coverage, bed net use, and larval control. The results indicate that such campaigns would red…
Killeen, GF, Smith, TA, Ferguson, HM, Mshinda, H, Abdulla, S, Lengeler, C and Kachur, SP	Preventing childhood malaria in Africa by protecting adults from mosquitoes with insecticide-treated nets	PLoS Medicine / Public Library of Science	2007	4	e229			BACKGROUND: Malaria prevention in Africa merits particular attention as the world strives toward a better life for the poorest. Insecticide-treated nets (ITNs) represent a practical means to prevent malaria in Africa, so scaling up coverage to at least 80% of young children and pregnant women by 2010 is integral to the Millennium Development Goals (MDG). Targeting individual protection to vulnera…
Kim, D, Lauria, DT, Poulos, C, Dong, B and Whittington, D	Effect of travel distance on household demand for typhoid vaccines: Implications for planning	International Journal of Health Planning and Management	2013					Typhoid fever causes millions of illnesses and hundreds of thousands of deaths yearly. Vaccinations would mitigate this problem, but the users would probably have to pay some or most of the cost. Several willingness-to-pay studies have assessed the effect of price on private demand to provide a basis for financial planning of campaigns, but the effect of travel distance, which is a potentially im…
Kim, JJ, Andres-Beck, B and Goldie, SJ	The value of including boys in an HPV vaccination programme: a cost-effectiveness analysis in a low-resource setting	British Journal of Cancer	2007	97	1322-8			We assessed the cost-effectiveness of including boys vs girls alone in a pre-adolescent vaccination programme against human papillomavirus (HPV) types 16 and 18 in Brazil. Using demographic, epidemiological, and cancer data from Brazil, we developed a dynamic transmission model of HPV infection between males and females. Model-projected reductions in HPV incidence under different vaccination scen…
Kim, JJ, Campos, NG, O'Shea, M, Diaz, M and Mutyaba, I	Model-Based Impact and Cost-Effectiveness of Cervical Cancer Prevention in Sub-Saharan Africa	Vaccine	2013	31	F60-F72			Using population and epidemiologic data for 48 countries in sub-Saharan Africa, we used a model-based approach to estimate cervical cancer cases and deaths averted, disability-adjusted life years (DALYs) averted and incremental cost-effectiveness ratios (1$ (international dollar) per DALY averted) for human papillomavirus (HPV) vaccination of pre-adolescent girls. Additional epidemiologic data fr…
Kim, JJ, Kobus, KE, Diaz, M, O'Shea, M, Van Minh, H and Goldie, SJ	Exploring the cost-effectiveness of HPV vaccination in Vietnam: insights for evidence-based cervical cancer prevention policy	Vaccine	2008	26	4015-24			Using mathematical models of cervical cancer for the northern and southern regions of Vietnam, we assessed the cost-effectiveness of cervical cancer prevention strategies and the tradeoffs between a national and region-based policy in Vietnam. With 70% vaccination and screening coverage, lifetime risk of cancer was reduced by 20.4-76.1% with vaccination of pre-adolescent girls and/or screening of…
Kim, JJ, Salomon, JA, Weinstein, MC and Goldie, SJ	Packaging health services when resources are limited: the example of a cervical cancer screening visit	PLoS Medicine / Public Library of Science	2006	3	e434			BACKGROUND: Increasing evidence supporting the value of screening women for cervical cancer once in their lifetime, coupled with mounting interest in scaling up successful screening demonstration projects, present challenges to public health decision makers seeking to take full advantage of the single-visit opportunity to provide additional services. We present an analytic framework for packaging…
Kim, JJ, Sharma, M, O'Shea, M, Sweet, S, Diaz, M, Sancho-Garnier, H and Seoud, M	Model-Based Impact and Cost-Effectiveness of Cervical Cancer Prevention in the Extended Middle East and North Africa (EMENA)	Vaccine	2013	31	G65-G77			To date, no studies have evaluated the cost-effectiveness of human papillomavirus (HPV) vaccination in countries in the Extended Middle East and North Africa (EMENA) region. We synthesized population and epidemiologic data for 20 EMENA countries using a model-based approach to estimate averted cervical cancer cases and deaths, disability-adjusted life years (DALYs) and cost-effectiveness ratios (…
Kim, LH, Cohan, DL, Sparks, TN, Pilliod, RA, Arinaitwe, E and Caughey, AB	The cost-effectiveness of repeat HIV testing during pregnancy in a resource-limited setting	Journal of Acquired Immune Deficiency Syndromes: JAIDS	2013	63	195-200			OBJECTIVE: To estimate the cost-effectiveness of HIV screening strategies for the prevention of perinatal transmission in Uganda, a resource-limited country with high HIV prevalence and incidence.;STUDY DESIGN: We designed a decision analytic model from a health care system perspective to assess the vertical transmission rates and cost-effectiveness of 4 different HIV screening strategies in preg…
Kim, SY, Goldie, SJ and Salomon, JA	Cost-effectiveness of Rotavirus vaccination in Vietnam	BMC Public Health	2009	9	29			BACKGROUND: Rotavirus is the most common cause of severe diarrhea leading to hospitalization or disease-specific death among young children. New rotavirus vaccines have recently been approved. Some previous studies have provided broad qualitative insights into the health and economic consequences of introducing the vaccines into low-income countries, representing several features of rotavirus inf…
Kim, SY, Lee, G and Goldie, SJ	Economic evaluation of pneumococcal conjugate vaccination in The Gambia	BMC Infectious Diseases	2010	10	260			BACKGROUND: Gambia is the second GAVI support-eligible country to introduce the 7-valent pneumococcal conjugate vaccine (PCV7), but a country-specific cost-effectiveness analysis of the vaccine is not available. Our objective was to assess the potential impact of PCVs of different valences in The Gambia.;METHODS: We synthesized the best available epidemiological and cost data using a state-transi…
Kim, SY, Russell, LB, Park, J, Verani, JR, Madhi, SA, Cutland, CL, Schrag, SJ and Sinha, A	Cost-effectiveness of a potential group B streptococcal vaccine program for pregnant women in South Africa	Vaccine	2014	32	1954-1963			Background: In low- and middle-income countries neonatal infections are important causes of infant mortality. Group B streptococcus (CBS) is a major pathogen. A GBS polysaccharide-protein conjugate vaccine, the only option that has the potential to prevent both early- and late-onset CBS disease, has completed Phase II trials. Screening-based intrapartum antibiotic prophylaxis (LAP) for pregnant w…
Kim, SY, Salomon, JA and Goldie, SJ	Economic evaluation of hepatitis B vaccination in low-income countries: using cost-effectiveness affordability curves	Bulletin of the World Health Organization	2007	85	833-42			OBJECTIVE: We sought to describe a method that explicitly considers both a health-care programmes cost-effectiveness and its affordability. For illustration, we apply the method to the programme to vaccinate infants against hepatitis B in the Gambia.;METHODS: We synthesized selected data and developed a computer-based model from the societal and payer perspectives to evaluate the cost-effectivene…
Kim, SY, Sweet, S, Chang, J and Goldie, SJ	Comparative evaluation of the potential impact of rotavirus versus HPV vaccination in GAVI-eligible countries: a preliminary analysis focused on the relative disease burden	BMC Infectious Diseases	2011	11	174			BACKGROUND: Immunization policymakers at global and local levels need to establish priorities among new vaccines competing for limited resources. However, comparison of the potential impact of single vaccination programs is challenging, primarily due to the limited number of vaccine analyses as well as their differing analytic approaches and reporting formats. The purpose of this study is to prov…
Kimmel, AD, Charles, M, Deschamps, MM, Severe, P, Edwards, AM, Johnson, WD, Fitzgerald, DW, Pape, JW and Schackman, BR	Lives saved by expanding HIV treatment availability in resource-limited settings: the example of Haiti	Journal of Acquired Immune Deficiency Syndromes: JAIDS	2013	63	e40-8			BACKGROUND: Guidelines recommend antiretroviral therapy (ART) initiation at CD4 <350 cells per microliter for HIV-infected individuals in resource-limited settings. However, funding for treatment expansion remains uncertain. We forecast the mortality impact of ART expansion alternatives in Haiti.;METHODS: We used data from Haiti to develop a country-specific model of HIV disease. The model projec…
Kimmel, AD, Resch, SC, Anglaret, X, Daniels, N, Goldie, SJ, Danel, C, Wong, AY, Freedberg, KA and Weinstein, MC	Patient- and population-level health consequences of discontinuing antiretroviral therapy in settings with inadequate HIV treatment availability	Cost Effectiveness and Resource Allocation	2012	10				Background: In resource-limited settings, HIV budgets are flattening or decreasing. A policy of discontinuing antiretroviral therapy (ART) after HIV treatment failure was modeled to highlight trade-offs among competing policy goals of optimizing individual and population health outcomes.Methods: In settings with two available ART regimens, we assessed two strategies: (1) continue ART after second…
Kimmel, AD, Weinstein, MC, Anglaret, X, Goldie, SJ, Losina, E, Yazdanpanah, Y, Messou, E, Cotich, KL, Walensky, RP, Freedberg, KA and Investigators, CE-I	Laboratory monitoring to guide switching antiretroviral therapy in resource-limited settings: clinical benefits and cost-effectiveness	Journal of Acquired Immune Deficiency Syndromes: JAIDS	2010	54	258-68			BACKGROUND: As second-line antiretroviral therapy (ART) availability increases in resource-limited settings, questions about the value of laboratory monitoring remain. We assessed the outcomes and cost-effectiveness (CE) of laboratory monitoring to guide switching ART.;METHODS: We used a computer model to project life expectancy and costs of different strategies to guide ART switching in patients…
Kingkaew, P, Maleewong, U, Ngarmukos, C and Teerawattananon, Y	Evidence to inform decision makers in Thailand: a cost-effectiveness analysis of screening and treatment strategies for postmenopausal osteoporosis	Value in Health	2012	15	S20-8			OBJECTIVES: To assess value for money of providing systematic screening for osteoporosis among postmenopausal women and medical treatments for those diagnosed with osteoporosis as evidence-based decision making for the revision of the National List of Essential Medicines.;METHODS: Decision analytic models were constructed, using a societal perspective, to assess the cost per quality-adjusted life…
Kirigia, JM, Emrouznejad, A, Cassoma, B, Asbu, EZ and Barry, S	A performance assessment method for hospitals: the case of municipal hospitals in Angola	J Med Syst	2008	32	509-19			Over 60% of the recurrent budget of the Ministry of Health (MoH) in Angola is spent on the operations of the fixed health care facilities (health centres plus hospitals). However, to date, no study has been attempted to investigate how efficiently those resources are used to produce health services. Therefore the objectives of this study were to assess the technical efficiency of public municipal…
Kirigia, JM, Emrouznejad, A and Sambo, LG	Measurement of technical efficiency of public hospitals in Kenya: using Data Envelopment Analysis	Journal of Medical Systems	2002	26	39-45			In Sub-Saharan Africa (SSA), there is a huge knowledge gap of health facilities performance. The objective of this study is to measure relative technical efficiencies of 54 public hospitals in Kenya using Data Envelopment Analysis (DEA) technique. 14 (26%) of the public hospitals were found to be technically inefficient. The study singled out the inefficient hospitals and provided the magnitudes …
Kirigia, JM, Emrouznejad, A, Sambo, LG, Munguti, N and Liambila, W	Using data envelopment analysis to measure the technical efficiency of public health centers in Kenya	Journal of Medical Systems	2004	28	155-66			Data Envelopment Analysis has been widely used to analyze the efficiency of health sector in developed countries, since 1978, while in Africa, only a few studies have attempted to apply DEA in the health organizations. In this paper we measure technical efficiency of public health centers in Kenya. Our finding suggests that 44% of public health centers are inefficient. Therefore, the objectives o…
Kiszewski, A, Johns, B, Schapira, A, Delacollette, C, Crowell, V, Tan-Torres, T, Ameneshewa, B, Teklehaimanot, A and Nafo-Traore, F	Estimated global resources needed to attain international malaria control goals	Bulletin of the World Health Organization	2007	85	623-30			OBJECTIVE: To provide the international community with an estimate of the amount of financial resources needed to scale up malaria control to reach international goals, including allocations by country, year and intervention as well as an indication of the current funding gap.;METHODS: A costing model was used to estimate the total costs of scaling up a set of widely recommended interventions, su…
Klein, DJ, Bershteyn, A and Eckhoff, PA	Dropout and re-enrollment: Implications for epidemiological projections of treatment programs	AIDS	2014	28	S47-S59			OBJECTIVE:: EMOD-HIV v0.8 has been used to estimate the potential impact of expanding treatment guidelines to allow earlier initiation of antiretroviral therapy (ART) in sub-Saharan Africa with current or improved treatment coverage. In generating these results, a model must additionally make assumptions about the rates of dropout and re-initiation into ART programs before and after the program c…
Klepac, P, Bjornstad, ON, Metcalf, CJ and Grenfell, BT	Optimizing reactive responses to outbreaks of immunizing infections: balancing case management and vaccination	PLoS ONE [Electronic Resource]	2012	7	e41428			For vaccine-preventable infections, immunization generally needs to be supplemented by palliative care of individuals missed by the vaccination. Costs and availability of vaccine doses and palliative care vary by disease and by region. In many situations, resources for delivery of palliative care are independent of resources required for vaccination; however we also need to consider the conservat…
Klingler, C, Thoumi, AI and Mrithinjayam, VS	Cost-effectiveness analysis of an additional birth dose of Hepatitis B vaccine to prevent perinatal transmission in a medical setting in Mozambique	Vaccine	2012	31	252-9			This study is the first to assess the cost-effectiveness of an additional birth dose of Hepatitis B (HBV) vaccine administered by professional birth attendants in medical settings in a sub-Saharan country (Mozambique). The WHO has recommended the birth dose to prevent perinatal transmission of HBV. A Markov model was constructed to analyse the costs and effects associated with avoiding perinatal …
Knerer, G, Currie, CSM and Brailsford, SC	Impact of combined vector-control and vaccination strategies on transmission dynamics of dengue fever: a model-based analysis	Health Care Management Science	2013		1-13			Dengue fever is a vector-borne disease prevalent in tropical and subtropical regions. It is an important public health problem with a considerable and often under-valued disease burden in terms of frequency, cost and quality-of-life. Recent literature reviews have documented the development of mathematical models of dengue fever both to identify important characteristics for future model developm…
Kokangul, A	A combination of deterministic and stochastic approaches to optimize bed capacity in a hospital unit	Computer Methods & Programs in Biomedicine	2008	90	56-65			Random number of arrivals and random length of stays make the number of patients in a hospital unit behave as a stochastic process. This makes the determination of the optimum size of the bed capacity more difficult. The number of admissions per day, service level and occupancy level are key control parameters that affect the optimum size of the required bed capacity. In this study a new stochast…
Konfino, J, Ferrante, D, Mejia, R, Coxson, P, Moran, A, Goldman, L and Perez-Stable, EJ	Impact on cardiovascular disease events of the implementation of Argentina's national tobacco control law	Tobacco Control	2014	23	8			Background Argentina's congress passed a tobacco control law that would enforce 100% smoke-free environments for the entire country, strong and pictorial health warnings on tobacco products and a comprehensive advertising ban. However, the Executive Branch continues to review the law and it has not been fully implemented. Our objective was to project the potential impact of full implementation of…
Kongsakon, R, Leelahanaj, T, Price, N, Birinyi-Strachan, L and Davey, P	Cost analysis of the treatment of schizophrenia in Thailand: a simulation model comparing olanzapine, risperidone, quetiapine, ziprasidone and haloperidol	Journal of the Medical Association of Thailand	2005	88	1267-77			OBJECTIVES: To compare the annual costs of treating schizophrenia with four atypical antipsychotics-olanzapine, risperidone, quetiapine and ziprasidone and one typical antipsychotic: haloperidol in Thailand;MATERIAL AND METHOD: The present study used a cost analysis model. The model simulated treatment of schizophrenics for 12 months with the data from international literature review. A comprehen…
Korenromp, EL, Van Vliet, C, Grosskurth, H, Gavyole, A, Van Der Ploeg, CPB, Fransen, L, Hayes, RJ and Habbema, JDF	Model-based evaluation of single-round mass treatment of sexually transmitted diseases for HIV control in a rural African population	AIDS	2000	14	573-593			Objectives: To compare the impact of single-round mass treatment of sexually transmitted diseases (STD), sustained syndromic treatment and their combination on the incidence of HIV in rural Africa. Methods: We studied the effects of STD interventions by stochastic simulation using the model STDSIM. Parameters were fitted using data from a trial of improved STD treatment services in Mwanza, Tanzan…
Korenromp, EL, White, RG, Orroth, KK, Bakker, R, Kamali, A, Serwadda, D, Gray, RH, Grosskurth, H, Habbema, JDF and Hayes, RJ	Determinants of the impact of sexually transmitted infection treatment on prevention of HIV infection: A synthesis of evidence from the Mwanza, Rakai, and Masaka intervention trials	Journal of Infectious Diseases	2005	191	S168-S175			Community-randomized trials in Mwanza, Tanzania, and Rakai and Masaka, Uganda, suggested that population characteristics were an important determinant of the impact of sexually transmitted infection (STI) treatment interventions on incidence of human immunodeficiency virus (HIV) infection. We performed simulation modeling of HIV and STI transmission, which confirmed that the low trial impact in R…
Kostiƒá, M, Jovanoviƒá, S, Tomoviƒá, M, Milenkoviƒá, MP and Jankoviƒá, SM	Cost-effectiveness analysis of tocilizumab in combination with methotrexate for rheumatoid arthritis: A Markov model based on data from Serbia, country in socioeconomic transition	Vojnosanitetski Pregled	2014	71	144-148			Background/Aim. Recent studies have shown that biological treatments for rheumatoid arthritis can change the course of rheumatoid arthritis and improve functional ability of patients with rheumatoid arthritis. In spite of this fact, use of biological therapy is still limited by high prices of these medicines, especially in countries in socioeconomic transition. The aim of our study was to compare…
Kou, G and Wu, W	Multi-criteria decision analysis for emergency medical service assessment	Annals of Operations Research	2014					In emergency management, it is important to arrange the medical resources according to emergency needs. This paper proposes a multi-criteria decision analysis model that combines grey theory and multi-criteria decision making theory to assess the current medical resource situation, find satisfactory solutions, and help the emergency decision makers to take appropriate responses in a timely manner…
Koyuncu, M and Erol, R	Optimal resource allocation model to mitigate the impact of pandemic influenza: a case study for Turkey	Journal of Medical Systems	2010	34	61-70			Pandemic influenza has been considered as a serious international health risk by many health authorities in the world. In mitigating pandemic influenza, effective allocation of limited health resources also plays a critical role along with effective use of medical prevention and treatment procedures. A national resource allocation program for prevention and treatment must be supported with the ri…
Kramer, RA, Dickinson, KL, Anderson, RM, Fowler, VG, Miranda, ML, Mutero, CM, Saterson, KA and Wiener, JB	Using decision analysis to improve malaria control policy making	Health Policy	2009	92	133-40			Malaria and other vector-borne diseases represent a significant and growing burden in many tropical countries. Successfully addressing these threats will require policies that expand access to and use of existing control methods, such as insecticide-treated bed nets (ITNs) and artemesinin combination therapies (ACTs) for malaria, while weighing the costs and benefits of alternative approaches ove…
Kroger, GB and Ejzenberg, D	The fiscal outcome of artificial conception in Brazil--creating citizens in developing countries	Human Reproduction	2012	27	142-5			BACKGROUND: Infertility is an important health issue, but only a small fraction of the affected population receives treatment in Brazil, because it is not covered by the government or private health insurance plans. We developed a generational accounting-based mathematical model to assess the direct economic result of creating a citizen through IVF in different economic scenarios, and the potenti…
Krumkamp, R, Kretzschmar, M, Rudge, JW, Ahmad, A, Hanvoravongchai, P, Westenhoefer, J, Stein, M, Putthasri, W and Coker, R	Health service resource needs for pandemic influenza in developing countries: a linked transmission dynamics, interventions and resource demand model	Epidemiology & Infection	2011	139	59-67			We used a mathematical model to describe a regional outbreak and extrapolate the underlying health-service resource needs. This model was designed to (i) estimate resource gaps and quantities of resources needed, (ii) show the effect of resource gaps, and (iii) highlight which particular resources should be improved. We ran the model, parameterized with data from the 2009 H1N1v pandemic, for two …
Kuhr, EM, Ribeiro, RA, Rohde, LE and Polanczyk, CA	Cost-effectiveness of supervised exercise therapy in heart failure patients	Value in Health	2011	14	S100-7			OBJECTIVE: Exercise therapy in heart failure (HF) patients is considered safe and has demonstrated modest reduction in hospitalization rates and death in recent trials. Previous cost-effectiveness analysis described favorable results considering long-term supervised exercise intervention and significant effectiveness of exercise therapy; however, these evidences are now no longer supported. To ev…
Kulpeng, W, Leelahavarong, P, Rattanavipapong, W, Sornsrivichai, V, Baggett, HC, Meeyai, A, Punpanich, W and Teerawattananon, Y	Cost-utility analysis of 10- and 13-valent pneumococcal conjugate vaccines: protection at what price in the Thai context?	Vaccine	2013	31	2839-47			OBJECTIVE: This study aims to evaluate the costs and outcomes of offering the 10-valent pneumococcal conjugate vaccine (PCV10) and 13-valent pneumococcal conjugate vaccine (PCV13) in Thailand compared to the current situation of no PCV vaccination.;METHODS: Two vaccination schedules were considered: two-dose primary series plus a booster dose (2+1) and three-dose primary series plus a booster dos…
Kulpeng, W, Sompitak, S, Jootar, S, Chansung, K and Teerawattananon, Y	Cost-utility analysis of dasatinib and nilotinib in patients with chronic myeloid leukemia refractory to first-line treatment with imatinib in Thailand	Clinical Therapeutics	2014	36	534-543			Background Recently, the second-generation tyrosine kinase inhibitors dasatinib and nilotinib have emerged as alternative treatments in patients with chronic myeloid leukemia (CML) who are resistant to or intolerant of imatinib. Objective This article aimed to assess the cost utility and budget impact of using dasatinib or nilotinib, rather than high-dose (800-mg/d) imatinib, in patients with chr…
Kumar, N	Changing geographic access to and locational efficiency of health services in two Indian districts between 1981 and 1996	Social Science & Medicine	2004	58	2045-67			In developing countries, including India, the role of the private sector in the provision of basic healthcare services is gradually expanding, since the public sector provides limited services and covers only limited areas. Using location-allocation models (LAM), this paper (1) examines the changing geographic access to and locational efficiency of basic public healthcare vis-a-vis private health…
Kumaranayake, L, Vickerman, P, Walker, D, Samoshkin, S, Romantzov, V, Emelyanova, Z, Zviagin, V and Watts, C	The cost-effectiveness of HIV preventive measures among injecting drug users in Svetlogorsk, Belarus	Addiction	2004	99	1565-76			AIM: To undertake a cost-effectiveness analysis of a harm reduction and HIV prevention project for injecting drug users (IDUs) in Eastern Europe. Economic evaluation methods were adapted to consider the effect of an 8-month financing gap that negatively impacted on project implementation.;DESIGN: Financial and economic costs of implementing the intervention were analysed retrospectively. The data…
Kuznik, A, Lamorde, M, Hermans, S, Castelnuovo, B, Auerbach, B, Semeere, A, Sempa, J, Ssennono, M, Ssewankambo, F and Manabe, YC	Evaluating the cost-effectiveness of combination antiretroviral therapy for the prevention of mother-to-child transmission of HIV in Uganda	Bulletin of the World Health Organization	2012	90	595-603			OBJECTIVE: To model the cost-effectiveness in Uganda of combination antiretroviral therapy (ART) to prevent mother-to-child transmission of human immunodeficiency virus (HIV).;METHODS: The cost-effectiveness of ART was evaluated on the assumption that ART reduces the risk of an HIV-positive pregnant woman transmitting HIV to her baby from 40% (when the woman is left untreated) to 25.8%, 17.4% and…
Kuznik, A, Lamorde, M, Nyabigambo, A and Manabe, YC	Antenatal Syphilis Screening Using Point-of-Care Testing in Sub-Saharan African Countries: A Cost-Effectiveness Analysis	Plos Medicine	2013	10	15			Background: Untreated syphilis in pregnancy is associated with adverse clinical outcomes for the infant. Most syphilis infections occur in sub-Saharan Africa (SSA), where coverage of antenatal screening for syphilis is inadequate. Recently introduced point-of-care syphilis tests have high accuracy and demonstrate potential to increase coverage of antenatal screening. However, country-specific cos…
Lach, JM and V√°zquez, RM	Simulation model of the telemedicine program	Proceedings of the 2004 Winter Simulation Conference	2004	2	2012-2017	Washington, DC		The Telemedicine Program was created to provide medical assistance to people living in extreme poverty conditions in Mexico. Through a satellite connection, a physician located in Mexico City can diagnose the patient who is physically inspected on a mobile unit, equipped with telecommunications gear. The program's performance has brought positive results, and is starting to expand to farther regi…
Lagarde, M, Blaauw, D and Cairns, J	Cost-effectiveness analysis of human resources policy interventions to address the shortage of nurses in rural South Africa	Social Science & Medicine	2012	75	801-6			Recent policy recommendations have called for increased research efforts to inform the design of cost-effective interventions to address the shortage of health workers in rural areas. This paper takes forward the recent use of Discrete Choice Experiments to assess the effects of potential incentives to attract nurses to rural areas. The analysis relies on data collected in South Africa between Au…
Lagarde, M and Cairns, J	Modelling human resources policies with Markov models: an illustration with the South African nursing labour market	Health Care Management Science	2012	15	270-82			This article proposes a modelling framework to simulate and assess the immediate and long-term effects of policy interventions to attract and retain nurses in rural areas. Specifically, we use a Markov model to model the dynamics of movements of health care workers in a professional labour market. A model is developed to simulate the movements of South African nurses between different segments of…
Lakiƒá, D, Bogavac-Stanojeviƒá, N, Jeliƒá-Ivanoviƒá, Z, Kotur-Stevuljeviƒá, J, Spasiƒá, S and Kos, M	A multimarker approach for the prediction of coronary artery disease: Cost-effectiveness analysis	Value in Health	2010	13	770-777			Objectives: Coronary artery disease (CAD), as the leading cause of death, poses a huge economic burden on health-care systems. We used a multi-marker approach to explore discriminative abilities of several lipid, inflammatory, and oxidative stress/antioxidative defense markers as CAD predictors. We assessed their cost-effectiveness compared with the Framingham risk score (FRS). Methods: Using a d…
Langley, I, Doulla, B, Lin, HH, Millington, K and Squire, B	Modelling the impacts of new diagnostic tools for tuberculosis in developing countries to enhance policy decisions	Health Care Management Science	2012	15	239-53			The introduction and scale-up of new tools for the diagnosis of Tuberculosis (TB) in developing countries has the potential to make a huge difference to the lives of millions of people living in poverty. To achieve this, policy makers need the information to make the right decisions about which new tools to implement and where in the diagnostic algorithm to apply them most effectively. These deci…
Lasry, A, Carter, MW and Zaric, GS	S4HARA: System for HIV/AIDS resource allocation	Cost Eff Resour Alloc	2008	6	7			BACKGROUND: HIV/AIDS resource allocation decisions are influenced by political, social, ethical and other factors that are difficult to quantify. Consequently, quantitative models of HIV/AIDS resource allocation have had limited impact on actual spending decisions. We propose a decision-support System for HIV/AIDS Resource Allocation (S4HARA) that takes into consideration both principles of effic…
Lasry, A, Zaric, GS and Carter, MW	Multi-level resource allocation for HIV prevention: A model for developing countries	European Journal of Operational Research	2007	180	786-799			Funds spent on HIV prevention commonly traverse several levels of distribution. For example, funds may be allocated to regions, and regional authorities may then allocate their funds to sub-regions or targeted risk groups. Decision makers at each level often make use of heuristics that may result in suboptimal allocation of resources. We examine the impact of equity-based heuristic allocation of …
Lauria, DT, Maskery, B, Poulos, C and Whittington, D	An optimization model for reducing typhoid cases in developing countries without increasing public spending	Vaccine	2009	27	1609-21			This article considers the investment case for using the Vi polysaccharide vaccine in developing countries from two perspectives: reducing typhoid cases and limiting new health care spending. A case study is presented using data from South and Southeast Asia. The purpose of the paper, however, is to draw broad implications that may apply to developing countries in general. Typical consumer demand…
Lawpoolsri, S, Klein, EY, Singhasivanon, P, Yimsamran, S, Thanyavanich, N, Maneeboonyang, W, Hungerford, LL, Maguire, JH and Smith, DL	Optimally timing primaquine treatment to reduce Plasmodium falciparum transmission in low endemicity Thai-Myanmar border populations	Malaria Journal	2009	8	159			BACKGROUND: Effective malaria control has successfully reduced the malaria burden in many countries, but to eliminate malaria, these countries will need to further improve their control efforts. Here, a malaria control programme was critically evaluated in a very low-endemicity Thai-Myanmar border population, where early detection and prompt treatment have substantially reduced, though not ended,…
Le Roux, F and Botha, GJ	Health post location for community oriented primary care	42nd International Conference on Computers and Industrial Engineering 2012, CIE 2012	2012	1	413-421	Cape Town		Community oriented primary care or COPC is a health care delivery approach aimed at providing preventive care for a certain specific community. The implementation of COPC is to be initiated in South Africa by setting up health posts at seven sites in the Tshwane district. The location of the health posts pose challenges and therefore the aim of this paper is to develop mathematical models and con…
Lee, BY, Assi, TM, Rajgopal, J, Norman, BA, Chen, SI, Brown, ST, Slayton, RB, Kone, S, Kenea, H, Welling, JS, Connor, DL, Wateska, AR, Jana, A, Wiringa, AE, Van Panhuis, WG and Burke, DS	Impact of introducing the pneumococcal and rotavirus vaccines into the routine immunization program in Niger	American Journal of Public Health	2012	102	269-76			OBJECTIVES: We investigated whether introducing the rotavirus and pneumococcal vaccines, which are greatly needed in West Africa, would overwhelm existing supply chains (i.e., the series of steps required to get a vaccine from the manufacturers to the target population) in Niger.;METHODS: As part of the Bill and Melinda Gates Foundation-funded Vaccine Modeling Initiative, we developed a computati…
Lee, BY, Assi, TM, Rookkapan, K, Connor, DL, Rajgopal, J, Sornsrivichai, V, Brown, ST, Welling, JS, Norman, BA, Chen, SI, Bailey, RR, Wiringa, AE, Wateska, AR, Jana, A, Van Panhuis, WG and Burke, DS	Replacing the measles ten-dose vaccine presentation with the single-dose presentation in Thailand	Vaccine	2011	29	3811-7			Introduced to minimize open vial wastage, single-dose vaccine vials require more storage space and therefore may affect vaccine supply chains (i.e., the series of steps and processes involved in distributing vaccines from manufacturers to patients). We developed a computational model of Thailand's Trang province vaccine supply chain to analyze the effects of switching from a ten-dose measles vacc…
Lee, BY, Assi, TM, Rookkapan, K, Wateska, AR, Rajgopal, J, Sornsrivichai, V, Chen, SI, Brown, ST, Welling, J, Norman, BA, Connor, DL, Bailey, RR, Jana, A, Van Panhuis, WG and Burke, DS	Maintaining Vaccine Delivery Following the Introduction of the Rotavirus and Pneumococcal Vaccines in Thailand	Plos One	2011	6	11			Although the substantial burdens of rotavirus and pneumococcal disease have motivated many countries to consider introducing the rotavirus vaccine (RV) and heptavalent pneumococcal conjugate vaccine (PCV-7) to their National Immunization Programs (EPIs), these new vaccines could affect the countries' vaccine supply chains (i.e., the series of steps required to get a vaccine from their manufacture…
Lee, BY, Bacon, KM, Bailey, R, Wiringa, AE and Smith, KJ	The potential economic value of a hookworm vaccine	Vaccine	2011	29	1201-10			Hookworm infection is a significant problem worldwide. As development of hookworm vaccine proceeds, it is essential for vaccine developers and manufacturers, policy makers, and other public health officials to understand the potential costs and benefits of such a vaccine. We developed a decision analytic model to evaluate the cost-effectiveness of introducing a hookworm vaccine into two populatio…
Lee, BY, Bacon, KM, Bottazzi, ME and Hotez, PJ	Global economic burden of Chagas disease: a computational simulation model	The Lancet Infectious Diseases	2013	13	342-8			BACKGROUND: As Chagas disease continues to expand beyond tropical and subtropical zones, a growing need exists to better understand its resulting economic burden to help guide stakeholders such as policy makers, funders, and product developers. We developed a Markov simulation model to estimate the global and regional health and economic burden of Chagas disease from the societal perspective.;MET…
Lee, BY, Bacon, KM, Connor, DL, Willig, AM and Bailey, RR	The potential economic value of a Trypanosoma cruzi (Chagas disease) vaccine in Latin America	PLoS Neglected Tropical Diseases [electronic resource]	2010	4	e916			BACKGROUND: Chagas disease, caused by the parasite Trypanosoma cruzi (T. cruzi), is the leading etiology of non-ischemic heart disease worldwide, with Latin America bearing the majority of the burden. This substantial burden and the limitations of current interventions have motivated efforts to develop a vaccine against T. cruzi.;METHODOLOGY/PRINCIPAL FINDINGS: We constructed a decision analytic …
Lee, BY, Bacon, KM, Shah, M, Kitchen, SB, Connor, DL and Slayton, RB	The economic value of a visceral leishmaniasis vaccine in Bihar state, India	American Journal of Tropical Medicine & Hygiene	2012	86	417-25			Visceral leishmaniasis (VL) is responsible for substantial morbidity and mortality and current available treatments have many limitations. The ability of VL infection to generate life-long immunity offers promise for the development of a VL vaccine. A VL vaccine candidate has recently completed phase I clinical trials. We constructed a computer simulation model to determine the potential economic…
Lee, BY, Cakouros, BE, Assi, TM, Connor, DL, Welling, J, Kone, S, Djibo, A, Wateska, AR, Pierre, L and Brown, ST	The impact of making vaccines thermostable in Niger's vaccine supply chain	Vaccine	2012	30	5637-43			OBJECTIVE: Determine the effects on the vaccine cold chain of making different types of World Health Organization (WHO) Expanded Program on Immunizations (EPI) vaccines thermostable.;METHODS: Utilizing a detailed computational, discrete-event simulation model of the Niger vaccine supply chain, we simulated the impact of making different combinations of the six current EPI vaccines thermostable.;F…
Lee, BY, Connor, DL, Kitchen, SB, Bacon, KM, Shah, M, Brown, ST, Bailey, RR, Laosiritaworn, Y, Burke, DS and Cummings, DAT	Economic value of dengue vaccine in Thailand	American Journal of Tropical Medicine and Hygiene	2011	84	764-772			With several candidate dengue vaccines under development, this is an important time to help stakeholders (e.g., policy makers, scientists, clinicians, and manufacturers) better understand the potential economic value (cost-effectiveness) of a dengue vaccine, especially while vaccine characteristics and strategies might be readily altered. We developed a decision analytic Markov simulation model t…
Lee, S, Golinski, M and Chowell, G	Modeling optimal age-specific vaccination strategies against pandemic influenza	Bulletin of Mathematical Biology	2012	74	958-80			In the context of pandemic influenza, the prompt and effective implementation of control measures is of great concern for public health officials around the world. In particular, the role of vaccination should be considered as part of any pandemic preparedness plan. The timely production and efficient distribution of pandemic influenza vaccines are important factors to consider in mitigating the …
Lee, WS, Lim, BT, Chai, PF, Kirkwood, CD and Lee, JK	Rotavirus genotypes in Malaysia and universal rotavirus vaccination	Human vaccines & Immunotherapeutics	2012	8	1401-6			Group A rotavirus (RV-A) genotypes isolated in Malaysia was studied to estimate the effectiveness of a universal RV-A vaccination in Malaysia. A simple mathematical model was used, with input from a two-year, two-center, prospective study on hospitalization of RV-A gastroenteritis (RVGE) in young children, published data on RV-A hospitalizations and genotypes, mortality on childhood GE and publis…
Leelahanaj, T	The cost-effectiveness of aripiprazole as adjunctive therapy in major depressive disorder: Thai economic model	Journal of the Medical Association of Thailand = Chotmaihet thangphaet	2010	93 Suppl 6	S43-50			Aripiprazole is the first atypical antipsychotic approved for adjunctive treatment to antidepressant therapy in patients with major depressive disorder (MDD). The current study aims to present an economic model and cost-effectiveness estimates for aripiprazole compared with placebo as adjunctive therapy to antidepressant treatment in patients with MDD who showed an incomplete response to a prospe…
Leelahanaj, T	Switching to sertraline or venlafaxine after failure of SSRIs treatment in major depressive disorder: an economic evaluation of the STAR*D trial	Journal of the Medical Association of Thailand	2012	95 Suppl 5	S29-37			BACKGROUND: Switching to another antidepressant is one of the alternative treatment strategies employed in major depressive disorder (MDD) patients who have no remission despite an adequate trial of an antidepressant. The aim of the present study was to present an economic evaluation of sertraline compared with venlafaxine after unsuccessful treatment for depression with citalopram.;MATERIAL AND …
Leelahavarong, P, Chaikledkaew, U, Hongeng, S, Kasemsup, V, Lubell, Y and Teerawattananon, Y	A cost-utility and budget impact analysis of allogeneic hematopoietic stem cell transplantation for severe thalassemic patients in Thailand	BMC Health Services Research	2010	10	209			BACKGROUND: Hematopoietic stem cell transplantation (HSCT) is the only curative treatment available to severe thalassemic patients. The treatment, however, is very costly, particularly in the context of low and middle income countries, and no studies have been carried out to explore its economic justifiability. This study aimed to estimate the cost-utility of HSCT compared with blood transfusions…
Leelahavarong, P, Teerawattananon, Y, Werayingyong, P, Akaleephan, C, Premsri, N, Namwat, C, Peerapatanapokin, W and Tangcharoensathien, V	Is a HIV vaccine a viable option and at what price? An economic evaluation of adding HIV vaccination into existing prevention programs in Thailand	BMC Public Health	2011	11	534			BACKGROUND: This study aims to determine the maximum price at which HIV vaccination is cost-effective in the Thai healthcare setting. It also aims to identify the relative importance of vaccine characteristics and risk behavior changes among vaccine recipients to determine how they affect this cost-effectiveness.;METHODS: A semi-Markov model was developed to estimate the costs and health outcomes…
Leelukkanaveera, Y, Sithisarankul, P and Hirunsutthikul, N	Provider-initiated HIV counseling and testing of out patients at community hospitals in Thailand: An economic evaluation using the Markov model	Asian Biomedicine	2010	4	479-484			Background: Provider-initiated HIV counseling and testing (PIHIVCT) is an important intervention that improves the access to care to HIV-infected patients and subsequently contributes to the success of national HIV/AIDS control efforts. However, in Thailand, the cost-effectiveness of this program is unknown. Objective: Determine the incremental cost-effectiveness ratios (ICER) in terms of Thai Ba…
Legrand, J, Sanchez, A, Le Pont, F, Camacho, L and Larouze, B	Modeling the impact of tuberculosis control strategies in highly endemic overcrowded prisons	PLoS ONE [Electronic Resource]	2008	3	e2100			BACKGROUND: Tuberculosis (TB) in prisons is a major health problem in countries of high and intermediate TB endemicity such as Brazil. For operational reasons, TB control strategies in prisons cannot be compared through population based intervention studies.;METHODOLOGY/PRINCIPAL FINDINGS: A mathematical model is proposed to simulate the TB dynamics in prison and evaluate the potential impact on …
Leisegang, R, Maartens, G, Hislop, M, Sargent, J, Darkoh, E and Cleary, S	A novel Markov model projecting costs and outcomes of providing antiretroviral therapy to public patients in private practices versus public clinics in South Africa	PLoS ONE [Electronic Resource]	2013	8	e53570			INTRODUCTION: Providing private antiretroviral therapy (ART) care for public sector patients could increase access to ART in low- and middle-income countries. We compared the costs and outcomes of a private-care and a public-care ART program in South Africa.;METHODS: A novel Markov model was developed from the public-care program. Patients were first tunneled for 6 months in their baseline CD4 ca…
Levecke, B, Speybroeck, N, Dobson, RJ, Vercruysse, J and Charlier, J	Novel insights in the fecal egg count reduction test for monitoring drug efficacy against soil-transmitted helminths in large-scale treatment programs	PLoS Neglected Tropical Diseases	2011	5				Background: The fecal egg count reduction test (FECRT) is recommended to monitor drug efficacy against soil-transmitted helminths (STHs) in public health. However, the impact of factors inherent to study design (sample size and detection limit of the fecal egg count (FEC) method) and host-parasite interactions (mean baseline FEC and aggregation of FEC across host population) on the reliability of…
Levin, A, Burgess, C, Garrison, LP, Jr., Bauch, C, Babigumira, J, Simons, E and Dabbagh, A	Global eradication of measles: an epidemiologic and economic evaluation	Journal of Infectious Diseases	2011	204 Suppl 1	S98-106			BACKGROUND: Measles remains an important cause of morbidity and mortality in children in developing countries. Due to the success of the measles mortality reduction and elimination efforts thus far, the WHO has raised the question of whether global eradication of measles is economically feasible.;METHODS: The cost-effectiveness of various measles mortality reduction and eradication scenarios was …
Levin, A, Levin, C, Kristensen, D and Matthias, D	An economic evaluation of thermostable vaccines in Cambodia, Ghana and Bangladesh	Vaccine	2007	25	6945-57			This paper evaluates the incremental health and programmatic cost impacts of new vaccine products, as compared to the standard vaccine products in multi-dose vials in Cambodia, Ghana, and Bangladesh. The authors use a cost-effectiveness model to estimate the impacts of introducing four thermostable vaccines with single-dose presentations: measles, yellow fever, bacille Calmette-Guerin, and diphth…
Levin, CE, Sellors, J, Shi, JF, Ma, L, Qiao, YL, Ortendahl, J, O'Shea, MKH and Goldie, SJ	Cost-effectiveness analysis of cervical cancer prevention based on a rapid human papillomavirus screening test in a high-risk region of China	International Journal of Cancer	2010	127	1404-1411			This study assessed the cost-effectiveness of a new, rapid human papillomavirus (HPV)-DNA screening test for cervical cancer prevention in the high-risk region of Shanxi, China. Using micro-costing methods, we estimated the resources needed to implement preventive strategies using cervical cytology or HPV-DNA testing, including the Hybrid Capture 2 (hc2) test (QIAGEN Corp., Gaithersburg, MD) and …
Levison, JH, Wood, R, Scott, CA, Ciaranello, AL, Martinson, NA, Rusu, C, Losina, E, Freedberg, KA and Walensky, RP	The clinical and economic impact of genotype testing at first-line antiretroviral therapy failure for HIV-infected patients in South Africa	Clinical Infectious Diseases	2013	56	587-97			BACKGROUND: In resource-limited settings, genotype testing at virologic failure on first-line antiretroviral therapy (ART) may identify patients with wild-type (WT) virus. After adherence counseling, these patients may safely and effectively continue first-line ART, thereby delaying more expensive second-line ART.;METHODS: We used the Cost-Effectiveness of Preventing AIDS Complications Internatio…
Levy, D, de Almeida, LM and Szklo, A	The Brazil SimSmoke policy simulation model: the effect of strong tobacco control policies on smoking prevalence and smoking-attributable deaths in a middle income nation	PLoS Medicine / Public Library of Science	2012	9	e1001336			BACKGROUND: Brazil has reduced its smoking rate by about 50% in the last 20 y. During that time period, strong tobacco control policies were implemented. This paper estimates the effect of these stricter policies on smoking prevalence and associated premature mortality, and the effect that additional policies may have.;METHODS AND FINDINGS: The model was developed using the SimSmoke tobacco contr…
Levy, D, Rodr√≠guez-Bu√±o, RL, Hu, TW and Moran, AE	The potential effects of tobacco control in China: Projections from the China SimSmoke simulation model	BMJ (Online)	2014	348				Objective To use a computer simulation model to project the potential impact in China of tobacco control measures on smoking, as recommended by the World Health Organization Framework Convention on Tobacco Control (FCTC), being fully implemented. Design Modelling study. Setting China. Population Males and females aged 15-74 years. Intervention Incremental impact of more complete implementation of…
Levy, DT, Bales, S, Lam, NT and Nikolayev, L	The role of public policies in reducing smoking and deaths caused by smoking in Vietnam: results from the Vietnam tobacco policy simulation model	Social Science & Medicine	2006	62	1819-30			A simulation model is developed for Vietnam to project smoking prevalence and associated premature mortality. The model examines independently and as a package the effects of five types of tobacco control policies: tax increases, clean air laws, mass media campaigns, advertising bans, and youth access policies. Predictions suggest that the largest reductions in smoking rates will result from impl…
Levy, DT, Benjakul, S, Ross, H and Ritthiphakdee, B	The role of tobacco control policies in reducing smoking and deaths in a middle income nation: results from the Thailand SimSmoke simulation model	Tobacco Control	2008	17	53-9			OBJECTIVES: With the male smoking prevalence near 60% in 1991, Thailand was one of the first Asian nations to implement strict tobacco control policies. However, the success of their efforts has not been well documented.;METHODS: The role of tobacco control policies are examined using the "SimSmoke" tobacco control model. We first validated the model against survey data on smoking prevalence. We …
Levy, DT, Ross, H, Zaloshnja, E, Shuperka, R and Rusta, M	The role of tobacco control policies in reducing smoking and deaths caused by smoking in an Eastern European nation: results from the Albania SimSmoke simulation model	Central European Journal of Public Health	2008	16	189-98			The Albania SimSmoke simulation model is used to examine the effects of tobacco control policies. The model is used to consider the projected trends in smoking prevalence and associated smoking-attributable deaths in the absence of new policies, and then to examine the effect of new policies that are consistent with the Framework Convention for Tobacco Control (FCTC) on these outcomes. The model …
Li, J, Gilmour, S, Zhang, H, Koyanagi, A and Shibuya, K	The epidemiological impact and cost-effectiveness of HIV testing, antiretroviral treatment and harm reduction programs	Aids	2012	26	2069-78			OBJECTIVES: To estimate trends in the HIV epidemic in China, and explore the epidemiological impact and cost-effectiveness of expanded voluntary counseling and testing (VCT), antiretroviral treatment (ART), and harm reduction programs in preventing the spread of HIV.;DESIGN AND METHODS: A mathematical model was developed and calibrated to reflect the dynamics of disease progression and transmissi…
Li, L, Yang, Y, Xueyong, Y, Taibo, L and Renrong, G	Surgical scheduling based on off-line bin-packing	2012 9th International Conference on Service Systems and Service Management (ICSSSM 2012), 2-4 July 2012	2012		491-4	Piscataway, NJ, USA	IEEE	This paper constructs the MIP model to solve the off-line surgical scheduling based on the off-line bin-packing. The goal of this model is to minimize the idle time of the operating rooms. This model consider comprehensive factors that each surgery has a due-date, surgeries of the same surgeon must be performed in the same operation room in one day, operating room is perishable and so on. Finally…
Li, M, Lu, C, Son, W, Miao, J, Ding, Y, Li, L, Zhang, L, Zhao, N, Hu, B and Zhang, Y	Significance of vulnerability assessment in establishment of Hainan provincal disaster medical system	Asian Pacific Journal of Tropical Medicine	2011	4	594-6			Hainan is an island province in south China with a high frequency of unconventional emergencies due to its special geographic location and national military defense role. Given the limited transportation route from Hainan to the outside world, self-rescue is more important to Hainan Province than other provinces in China and it is therefore imperative to establish an independent, scientific as we…
Li, N and Li, LX	Modeling staffing flexibility: A case of China	European Journal of Operational Research	2000	124	255-266			This paper presents a multi-skilled staff planning model that considers staff flexibility. The primary purpose of this research is to develop a representative staff planning model which captures the balance of cost and benefits of staff flexibility for a service facility. Multiple objective goal programming (GP) method has been applied to analyze several diversified goals. The model has general a…
Li, X, Beullens, P, Jones, D and Tamiz, M	An integrated queuing and multi-objective bed allocation model with application to a hospital in China	Journal of the Operational Research Society	2009	60	330-338			In this paper, a multi-objective decision aiding model is introduced for allocation of beds in a hospital. The model is based on queuing theory and goal programming (GP). Queuing theory is used to obtain some essential characteristics of access to various departments (or specialities) within the hospital. Results from the queuing models are used to construct a multi-objective decision aiding mode…
Li, XD, Beullens, P, Jones, D and Tamiz, M	Optimal Bed Allocation in Hospitals	7th Multi-Objective Programming and Goal Programming Conference	2009	618	253-265	Tours, France	Springer-Verlag Berlin	In this paper a decision aiding model is introduced for optimizing the allocation of beds in a hospital. The model is based on queueing theory and goal programming (GP). Queueing theory is used to obtain some essential characteristics of access to various departments (or specialities) within the hospital. Results from the queueing models are used to construct a multi-objective decision aiding mod…
Liang, G and Sheng, H	Simulation of china healthcare reform with agents and polices merge into the new mechanism	International Journal of Digital Content Technology and its Applications	2012	6	376-383			This paper presents a novel method for the new China healthcare mechanism spread. Using the Markov Decision Process, we consider the specific objective of inducing citizen to the new desired healthcare mechanism. We examine the case in which the agent's reward function is unknown to the mechanism designer, and give a linear program for this case. Our method provides a game theoretic interpretatio…
Lietman, T and Blower, SM	Potential impact of tuberculosis vaccines as epidemic control agents	Clinical Infectious Diseases	2000	30 Suppl 3	S316-22			We use 2 simple mathematical models (one a preexposure vaccine model and the other a postexposure vaccine model) to provide general insight into the effects of vaccination on tuberculosis epidemics. We discuss how these models can be used as health policy tools: to identify which vaccines are "equivalent," to design control strategies, and to predict the epidemiological impact of different vaccin…
Limcangco, MR, Armour, CL, Salole, EG and Taylor, SJ	Cost-benefit analysis of a Haemophilus influenzae type b meningitis prevention programme in The Philippines	Pharmacoeconomics	2001	19	391-400			BACKGROUND: Haemophilus influenzae type b (Hib) meningitis is associated with high mortality and serious sequelae in children under 5 years of age. Vaccines which can prevent this infection are available.;OBJECTIVE: To evaluate the costs and benefits of a 3-dose immunisation schedule in Manila, Philippines.;PERSPECTIVE: Government and societal perspectives.;DESIGN AND PARTICIPANTS: A cost-benefit…
Lin, CT and Tsai, MC	Location choice for direct foreign investment in new hospitals in China by using ANP and TOPSIS	Quality and Quantity	2010	44	375-390			This study models location choices for foreign direct investments in new hospitals in China as an multi-criteria decision-making (MCDM) problem and designs develops a multidirectional relationship decision model combines the techniques of analytic network process (ANP) and technique for order performance based on similarity to the ideal solution (TOPSIS). This study discusses applying ANP to the …
Lin, HH, Dowdy, D, Dye, C, Murray, M and Cohen, T	The impact of new tuberculosis diagnostics on transmission: why context matters	Bulletin of the World Health Organization	2012	90	739-747			Objective To estimate the impact of new tuberculosis diagnostics on tuberculosis transmission given the complex contextual factors that can lead to patient loss before diagnosis or treatment. Methods An epidemic model of tuberculosis specifying discrete steps along the tuberculosis diagnostic pathway was constructed. The model was calibrated to the epidemiology of tuberculosis and human immunodef…
Lin, HH, Langley, I, Mwenda, R, Doulla, B, Egwaga, S, Millington, KA, Mann, GH, Murray, M, Squire, SB and Cohen, T	A modelling framework to support the selection and implementation of new tuberculosis diagnostic tools	International Journal of Tuberculosis and Lung Disease	2011	15	996-1004			Efforts to stimulate technological innovation in the diagnosis of tuberculosis (TB) have resulted in the recent introduction of several novel diagnostic tools. As these products come to market, policy makers must make difficult decisions about which of the available tools to implement. This choice should depend not only on the test characteristics (e.g., sensitivity and specificity) of the tools,…
Lindner, LM, Marasciulo, AC, Farias, MR and Grohs, GE	Economic evaluation of antipsychotic drugs for schizophrenia treatment within the Brazilian Healthcare System	Revista de Saude Publica	2009	43 Suppl 1	62-9			OBJECTIVE: To assess the cost-utility of first and second-generation antipsychotics for treatment of schizophrenia.;METHODS: A five-year Markov model was constructed based on a survey of the records of patients seen in 2006 at a psychosocial care center in the municipality of Florianopolis, Southern Brazil. Costs were evaluated from the perspective of the Sistema Unico de Saude (SUS - Unified Hea…
Linping, X, Lulu, Z, Weidong, T and Hong, L	Evaluating sustainability of medical insurance scheme for urban employed individuals in China	Geneva Papers on Risk and Insurance: Issues and Practice	2010	35	600-625			In the late 1990s, the Chinese government established the medical insurance scheme for urban employees and retirees. Given China's considerable size and diversity, the reform of the medical care system faces many challenges. It is important to analyse and evaluate the impact of the reform on individuals health care benefits and on their financial burden due to medical expenses. This research inve…
Linping, X and Xiuqiang, M	Forecasting China's medical insurance policy for urban employees using a microsimulation model	JASSS	2007	10				This paper uses microsimulation techniques to model individual's medical behavior and forecast the effects of different settings of medical insurance policies. The aim of the simulation is to measure the possible change and difference in policies in the process of implementation of the medical insurance policy settings for government policy makers. Based on predicting the medical expenses for urb…
Little, K, Newell, ML, Luo, C, Ngongo, N, Borja, MC and McDermott, P	Estimating the number of vertically HIV-infected children eligible for antiretroviral treatment in resource-limited settings	International Journal of Epidemiology	2007	36	679-687			Background: With the gradual roll-out of antiretroviral therapy (ART) to delay progression of HIV disease in children in programmes across sub-Saharan Africa and resource-limited settings elsewhere, reliable information on the number of vertically infected children eligible for such treatment is urgently required. Methods: We present a model to estimate the number of vertically HIV-infected child…
Liu, GG, Yin, DD, Lyu, R, Chaikledkaew, U and Louie, S	Economic costs of HIV infection: An employer's perspective	European Journal of Health Economics	2002	3	226-234			The introduction of highly active antiretroviral therapy has proven highly effective in treating patients with HIV/AIDS. However, the high cost of the advanced antiretroviral therapy has led to increased financial constraints on both patients and payers. From business firms' perspective, especially those with operations in developing countries, it is crucial to determine the long-term economic co…
Liu, N, Yen, C, Fang, ZY, Tate, JE, Jiang, B, Parashar, UD, Zeng, G and Duan, ZJ	Projected health impact and cost-effectiveness of rotavirus vaccination among children <5 years of age in China	Vaccine	2012	30	6940-5			INTRODUCTION: Two rotavirus vaccines have been licensed globally since 2006. In China, only a lamb rotavirus vaccine is licensed and several new rotavirus vaccines are in development. Data regarding the projected health impact and cost-effectiveness of vaccination of children in China against rotavirus will assist policy makers in developing recommendations for vaccination.;METHODS: Using a Micro…
Liu, W, Clemens, JD, Kari, K and Xu, ZY	Cost-effectiveness of Japanese encephalitis (JE) immunization in Bali, Indonesia	Vaccine	2008	26	4456-60			Two hypothetical birth cohorts in Bali, each consisting of 100,000 newborns, one immunized with live, attenuated JE vaccine and the other un-immunized, were modeled for JE risk over 11 years. Cumulative JE incidence before JE vaccine introduction was used to represent JE risk in the unvaccinated cohort. Data on vaccine efficacy, vaccination and treatment costs were taken from published papers and…
Liubao, P, Xiaomin, W, Chongqing, T, Karnon, J, Gannong, C, Jianhe, L, Wei, C, Xia, L and Junhua, C	Cost-effectiveness analysis of adjuvant therapy for operable breast cancer from a Chinese perspective: doxorubicin plus cyclophosphamide versus docetaxel plus cyclophosphamide	Pharmacoeconomics	2009	27	873-86			An oncology trial compared four cycles of doxorubicin/cyclophosphamide (AC) with four cycles of docetaxel/cyclophosphamide (TC) in operable breast cancer patients (71% were diagnosed with hormone receptor positive and 48% with node-negative breast cancer). The objective of this study was to estimate the lifetime cost effectiveness of AC versus TC, from a Chinese healthcare provider perspective, b…
Lohse, N, Marseille, E and Kahn, JG	Development of a model to assess the cost-effectiveness of gestational diabetes mellitus screening and lifestyle change for the prevention of type 2 diabetes mellitus	International Journal of Gynaecology & Obstetrics	2011	115 Suppl 1	S20-5			Gestational diabetes mellitus (GDM) is increasingly recognized as an opportunity for early prevention of diabetes and other diseases over the lifespan, and may be responsible for up to 30% of cases of type 2 diabetes. A newly developed mathematical model (the GDModel) provides provisional estimates of the cost and health impact of various GDM screening and management choices, and calculates avert…
Londish, GJ and Murray, JM	Significant reduction in HIV prevalence according to male circumcision intervention in sub-Saharan Africa	International Journal of Epidemiology	2008	37	1246-53			BACKGROUND: Observations that reduced adult HIV prevalence in sub-Saharan Africa correlated with levels of male circumcision (MC), have suggested that MC could be used as a preventative measure against HIV infection. The exact benefits of this intervention are uncertain. Moreover if MC is not feasible for the whole male population, which groups should be targeted?;METHODS: A mathematical model si…
Long, EF and Stavert, RR	Portfolios of biomedical HIV interventions in South Africa: a cost-effectiveness analysis	Journal of General Internal Medicine	2013	28	1294-301			BACKGROUND: Recent clinical trials of male circumcision, oral pre-exposure prophylaxis (PrEP), and a vaginal microbicide gel have shown partial effectiveness at reducing HIV transmission, stimulating interest in implementing portfolios of biomedical prevention programs.;OBJECTIVE: To evaluate the effectiveness and cost-effectiveness of combination biomedical HIV prevention and treatment scale-up …
Long, EF, Vaidya, NK and Brandeau, ML	Controlling Co-Epidemics: Analysis of HIV and Tuberculosis Infection Dynamics	Oper Res	2008	56	1366-1381			A co-epidemic arises when the spread of one infectious disease stimulates the spread of another infectious disease. Recently, this has happened with human immunodeficiency virus (HIV) and tuberculosis (TB). We develop two variants of a co-epidemic model of two diseases. We calculate the basic reproduction number (R(0)), the disease-free equilibrium, and the quasi-disease-free equilibria, which we…
Longini, IM, Jr., Nizam, A, Xu, S, Ungchusak, K, Hanshaoworakul, W, Cummings, DA and Halloran, ME	Containing pandemic influenza at the source	Science	2005	309	1083-7			Highly pathogenic avian influenza A (subtype H5N1) is threatening to cause a human pandemic of potentially devastating proportions. We used a stochastic influenza simulation model for rural Southeast Asia to investigate the effectiveness of targeted antiviral prophylaxis, quarantine, and pre-vaccination in containing an emerging influenza strain at the source. If the basic reproductive number (R0…
Lopes, MACQ, Nishikawa, AM, Paladini, LM, Neto, PAL, Brito J√∫nior, FS, Sarmento-Leite, R, Bueno, C, Clark, OAC, Antonio Marin-Neto, J and Eduardo Sousa, J	Transcatheter aortic valve implantation for the treatment of severe aortic valve stenosis in inoperable patients under the Perspective of the Brazilian Supplemental health system - Cost-effectiveness analysis	Revista Brasileira de Cardiologia Invasiva	2013	21				Background: Transcatheter aortic valve implantation (TAVI) is a new modality of treatment especially dedicated to patients with high surgical risk. In these patients, TAVI increased survival and improved quality of life when compared to standard treatment (drug therapy with or without percutaneous aortic balloon valvuloplasty). Our objective was to perform a cost-efficacy analysis of the implemen…
Lopez, E, Debbag, R, Coudeville, L, Baron-Papillon, F and Armoni, J	The cost-effectiveness of universal vaccination of children against hepatitis A in Argentina: results of a dynamic health-economic analysis	Journal of Gastroenterology	2007	42	152-60			BACKGROUND: Socioeconomic improvements can reduce levels of endemic hepatitis A, but conversely increase the burden of disease. Routine childhood vaccination can rapidly control hepatitis A infection rates through the induction of herd immunity, although such programs can be costly.;METHODS: We evaluated the healthcare benefits and cost-effectiveness of a routine childhood vaccination program aga…
L√≥pez, J, Lanzarini, L and De Giusti, A	Evolutionary multiobjective optimization for emergency medical services	13th Annual Genetic and Evolutionary Computation Conference, GECCO'11	2011		83-84	Dublin		In this paper, the use of evolutionary metaheuristics for the optimization of emergency medical services (EMS) applied to a real-world case in Argentina is analyzed. The problem requires the simultaneous optimization of two opposing objectives - reducing service delay time and minimizing the use of third-party medical vehicle. Therefore, a multiobjective technique was implemented. Several multiob…
Lopez, LF, Coutinho, FAB, Burattini, MN and Massad, E	A schematic age-structured compartment model of the impact of antiretroviral therapy on HIV incidence and prevalence	Mathematics and Computers in Simulation	2006	71	131-148			A simple deterministic model is proposed to represent the basic aspects concerning the effects of different antiretroviral treatment schedules on HIV incidence and prevalence of affected populations. The model mimics current treatment guidelines applied in Brazil. However, the model does not intend to fit the data with any acceptable degree of accuracy since uncertainties on the values of the par…
Lou, J, Blevins, M, Ruan, YH, Vermund, SH, Tang, SY, Webb, GF, Shepherd, BE, He, X, Lu, HY, Shao, YM and Qian, HZ	Modeling the Impact on HIV Incidence of Combination Prevention Strategies among Men Who Have Sex with Men in Beijing, China	Plos One	2014	9	8			Objective: To project the HIV/AIDS epidemics among men who have sex with men (MSM) under different combinations of HIV testing and linkage to care (TLC) interventions including antiretroviral therapy (ART) in Beijing, China. Design: Mathematical modeling. Methods: Using a mathematical model to fit prevalence estimates from 2000-2010, we projected trends in HIV prevalence and incidence during 2011…
Lou, J, Wu, J, Chen, L, Ruan, Y and Shao, Y	A sex-role-preference model for HIV transmission among men who have sex with men in China	BMC Public Health	2009	9 Suppl 1	S10			BACKGROUND: Men who have sex with men (MSM) are much more likely to be infected with HIV than the general population. China has a sizable population of MSM, including gay, bisexual men, money boys and some rural workers. So reducing HIV infection in this population is an important component of the national HIV/AIDS prevention and control program.;METHODS: We develop a mathematical model using a s…
Lowalekar, H and Ravichandran, N	A model for blood components processing	Transfusion	2011	51	1624-34			BACKGROUND: Blood component therapy is advantageous in terms of increasing the effective availability of blood units and reducing the transfusion-related risks. One unit of blood can be separated into components and made available to multiple patients by transfusing suitable components. It is often believed that most, if not all, of the blood should be fractionated. But the process of componentiz…
Lu, SQ, McGhee, SM, Xie, X, Cheng, J and Fielding, R	Economic evaluation of universal newborn hepatitis B vaccination in China	Vaccine	2013	31	1864-9			OBJECTIVE: To estimate the long-term cost-effectiveness of universal newborn hepatitis B vaccination in China, an area of high endemicity.;METHOD: A decision tree was used to describe perinatal hepatitis B virus (HBV) transmission, early infection and impact of vaccination. A Markov model based on 1-year cycles was used to simulate these impacts for the lifetime of a cohort of 10,000,000 infants …
Luangasanatip, N, Chaiyakunapruk, N, Upakdee, N and Wong, P	Iron-chelating therapies in a transfusion-dependent thalassaemia population in Thailand: a cost-effectiveness study	Clinical Drug Investigation	2011	31	493-505			BACKGROUND AND OBJECTIVE: beta-Thalassaemia is a major public health problem in Thailand. Use of appropriate iron-chelating agents could prevent thalassaemia-related complications, which are costly to the healthcare system. This study aimed to evaluate the cost effectiveness of deferoxamine (DFO), deferiprone (DFP) and deferasirox (DFX) in Thai transfusion-dependent beta-thalassaemia patients fro…
Lubell, Y, Hopkins, H, Whitty, CJM, Staedke, SG and Mills, A	An interactive model for the assessment of the economic costs and benefits of different rapid diagnostic tests for malaria	Malaria Journal	2008	7				Background. Rapid diagnostic tests (RDTs) for malaria are increasingly being considered for routine use in Africa. However, many RDTs are available and selecting the ideal test for a particular setting is challenging. The appropriateness of RDT choice depends in part on patient population and epidemiological setting, and on decision makers' priorities. The model presented (available online) can b…
Lubell, Y, Mills, AJ, Whitty, CJ and Staedke, SG	An economic evaluation of home management of malaria in Uganda: an interactive Markov model	PLoS ONE [Electronic Resource]	2010	5	e12439			BACKGROUND: Home management of malaria (HMM), promoting presumptive treatment of febrile children in the community, is advocated to improve prompt appropriate treatment of malaria in Africa. The cost-effectiveness of HMM is likely to vary widely in different settings and with the antimalarial drugs used. However, no data on the cost-effectiveness of HMM programmes are available.;METHODS/PRINCIPAL…
Lubell, Y, Reyburn, H, Mbakilwa, H, Mwangi, R, Chonya, S, Whitty, CJM and Mills, A	The impact of response to the results of diagnostic tests for malaria: Cost-benefit analysis	BMJ	2008	336	202-205			Objective: Rapid diagnostic tests for malaria seem cost effective in standard analyses, but these do not take account of clinicians' response to test results. This study tested the impact of clinicians' response to rapid diagnostic test or microscopy results on the costs and benefits of testing at different levels of malaria transmission and in different age groups. Design: Cost-benefit analysis …
Lubell, Y, Riewpaiboon, A, Dondorp, AM, Von Seidlein, L, Mokuolu, OA, Nansumba, M, Gesase, S, Kent, A, Mtove, G, Olaosebikan, R, Ngum, WP, Fanello, CI, Hendriksen, I, Day, NP, Whitea, NJ and Yeungk, S	Cost-effectiveness of parenteral artesunate for treating children with severe malaria in sub-saharan Africa	Bulletin of the World Health Organization	2011	89	504-512			Objective To explore the cost-effectiveness of parenteral artesunate for the treatment of severe malaria in children and its potential impact on hospital budgets. Methods The costs of inpatient care of children with severe malaria were assessed in four of the 11 sites included in the African Quinine Artesunate Malaria Treatment trial, conducted with over 5400 children. The drugs, laboratory tests…
Lund, C and Flisher, AJ	Norms for mental health services in South Africa	Social Psychiatry & Psychiatric Epidemiology	2006	41	587-94			BACKGROUND: In the aftermath of apartheid, South Africa has inherited a fragmented, under-resourced and inequitable public sector mental health service. Attempts are being made to reform mental health services, in keeping with new health policy, which proposes the downscaling of psychiatric institutions and the development of community-based services. This study set out to develop a set of servic…
Lund, C and Flisher, AJ	A model for community mental health services in South Africa	Tropical Medicine and International Health	2009	14	1040-1047			Objectives To provide a model to estimate human resource needs for community-based mental health services in South Africa. Methods A situation analysis was conducted of currentcommunity-based mental health service provision in South Africa, which comprise outpatient and emergency services, residential care and day care. Service utilisation rates and staffing needs were estimated for two levels of…
Lutz, MA, Lovato, P and Cuesta, G	Cost analysis of varenicline versus bupropion, nicotine replacement therapy, and unaided cessation in Nicaragua	Hospital practice (1995) Hospital practice	2012	40	35-43			OBJECTIVES: In Nicaragua, 30% of current morbidities are associated with tobacco smoking. Tobacco control policy measures have been initiated in this Central American country; however, the population does not have a complete understanding of the long-term consequences of tobacco use. The aim of this study was to compare the direct medical costs of smoking cessation therapies with varenicline, bup…
Lutz, MA, Lovato, P and Cuesta, G	Cost-effectiveness analysis of varenicline versus existing smoking cessation strategies in Central America and the Caribbean using the BENESCO model	Hospital practice (1995) Hospital practice	2012	40	24-34			OBJECTIVES: In Central American countries, the economic burden of tobacco has not been assessed. In Costa Rica, a study demonstrated that tobacco-related diseases represent high costs for the health care system. The aim of this study was to assess the cost-effectiveness of varenicline compared with other existing strategies for smoking cessation within a 10-year time horizon in an adult populatio…
Luz, PM, Codeco, CT, Medlock, J, Struchiner, CJ, Valle, D and Galvani, AP	Impact of insecticide interventions on the abundance and resistance profile of Aedes aegypti	Epidemiology and Infection	2009	137	1203-1215			Insecticide-based vector control is the primary strategy for curtailing dengue transmission. We used a mathematical model of the seasonal population dynamics of the dengue mosquito vector, Aedes aegypti, both to assess the effectiveness of insecticide interventions on reducing adult mosquito abundance and to predict evolutionary trajectories of insecticide resistance. We evaluated interventions t…
Luz, PM, Codeco, CT, Werneck, GL and Struchiner, CJ	A modelling analysis of pertussis transmission and vaccination in Rio de Janeiro, Brazil	Epidemiology & Infection	2006	134	850-62			Pertussis is an infectious respiratory disease for which mass vaccination is an effective preventive strategy. In many developed countries, where high vaccination coverage has been maintained for approximately 50 years, re-emergence of the disease has been observed in all age groups. In the municipality of Rio de Janeiro (RJ), where vaccination started in the 1980s, surveillance data show no sign…
Luz, PM, Vanni, T, Medlock, J, Paltiel, AD and Galvani, AP	Dengue vector control strategies in an urban setting: an economic modelling assessment	Lancet	2011	377	1673-80			BACKGROUND: An estimated 25 billion people are at risk of dengue. Incidence of dengue is especially high in resource-constrained countries, where control relies mainly on insecticides targeted at larval or adult mosquitoes. We did epidemiological and economic assessments of different vector control strategies.;METHODS: We developed a dynamic model of dengue transmission that assesses the evolutio…
Lydon, P, Zipursky, S, Tevi-Benissan, C, Djingarey, MH, Gbedonou, P, Oumar Youssouf, B and Zaffran, M	Economic benefits of keeping vaccines at ambient temperature during mass vaccination: The case of meningitis A vaccine in Chad	Bulletin of the World Health Organization	2014	92	86-92			Objective To evaluate the potential economic benefits of keeping a meningitis A vaccine at or near ambient temperature for up to 4 days during a mass vaccination campaign. Methods During a 10-day mass vaccination campaign against meningitis A in three regions of Chad in 2011, the costs associated with storage and transport of the vaccine in a traditional cold chain system were evaluated. A mathem…
Machado, M, Iskedjian, M, Ruiz, IA and Einarson, TR	The economic impact of introducing serotonin-noradrenaline reuptake inhibitors into the Brazilian national drug formulary: cost-effectiveness and budget-impact analyses	Pharmacoeconomics	2007	25	979-90			OBJECTIVE: To determine the cost effectiveness, from the Brazilian Ministry of Health viewpoint, of three antidepressant classes for major depressive disorder (MDD), and the budget impact of introducing serotonin-noradrenaline (norepinephrine) reuptake inhibitors (SNRIs) into the current Brazilian national drug formulary, assuming a 6-month treatment duration.;METHODS: An existing decision-tree m…
Machado, M, Lopera, MM, Diaz-Rojas, J, Jaramillo, LE and Einarson, TR	Pharmacoeconomics of antidepressants in moderate-to-severe depressive disorder in Colombia	Revista Panamericana de Salud Publica/Pan American Journal of Public Health	2008	24	233-239			Objective. To compare three antidepressant drugs from different classes used in treating moderate-to-severe major depressive disorder (MDD) in Colombian adults. Methods. Based on expert input, a decision-tree model was adapted for Colombia to analyze data over 6 months from the government-payer perspective. The cost-effectiveness of amitriptyline, fluoxetine, and venlafaxine was determined. The c…
Maclean, CC and Stringer, JS	Potential cost-effectiveness of maternal and infant antiretroviral interventions to prevent mother-to-child transmission during breast-feeding	Journal of Acquired Immune Deficiency Syndromes: JAIDS	2005	38	570-7			INTRODUCTION: One-third of maternal-to-child HIV transmission occurs during breast-feeding (BF). Several trials are currently evaluating the efficacy of postpartum antiretrovirals to reduce BF transmission.;METHODS: This study used Markov modeling to define the circumstances under which the following interventions would be cost-effective: BF for 6 months with daily infant nevirapine (NVP) prophyl…
Maenthaisong, R, Chaiyakunapruk, N and Thamlikitkul, V	Cost-effectiveness analysis of chlorhexidine gluconate compared with povidone-iodine solution for catheter-site care in Siriraj Hospital, Thailand	Journal of the Medical Association of Thailand	2006	89 Suppl 5	S94-101			BACKGROUND: Catheter-related bloodstream infections (CRBSI) are an important cause of patient morbidity, mortality, and increased health care costs. Use of an antiseptic solution for skin disinfection at the catheter insertion site helps prevent catheter-related infections. In Thailand, povidone-iodine solution is the most commonly used agent for this purpose. However, the results of several stud…
Maire, N, Shillcutt, SD, Walker, DG, Tediosi, F and Smith, TA	Cost-effectiveness of the introduction of a pre-erythrocytic malaria vaccine into the expanded program on immunization in sub-Saharan Africa: analysis of uncertainties using a stochastic individual-based simulation model of Plasmodium falciparum malaria	Value in Health	2011	14	1028-38			OBJECTIVE: To evaluate the cost-effectiveness of introducing the RTS,S malaria vaccine into the Expanded Programme on Immunization (EPI) in Sub-Saharan Africa (SSA), the contributions of different sources of uncertainty, and the associated expected value of perfect information (EVPI).;METHODS: Vaccination was simulated in populations of 100,000 people at 10 different entomological inoculation rat…
Maire, N, Tediosi, F, Ross, A and Smith, T	Predictions of the epidemiologic impact of introducing a pre-erythrocytic vaccine into the expanded program on immunization in sub-Saharan Africa	American Journal of Tropical Medicine & Hygiene	2006	75	111-8			We predict the effects of introduction of a pre-erythrocytic vaccine against Plasmodium falciparum into a malaria-endemic population in Africa. We use a stochastic simulation model that includes components of transmission, parasitology, and clinical epidemiology of malaria and was validated using the results of field trials of the RTS,S/AS02A vaccine. The results suggest that vaccines with effica…
Maleewong, U, Kulsomboon, V and Teerawattananon, Y	The cost-effectiveness analysis of initiating HIV/AIDS treatment with efavirenz-based regimens compared with nevirapine-based regimens in Thailand	Journal of the Medical Association of Thailand	2008	91 Suppl 2	S126-38			OBJECTIVES: The aim of this study is to evaluate the cost-utility of the treatment, starting with EFZ-based therapy, compared with NVP-based therapy in Thai HIV/AIDS patients.;MATERIAL AND METHOD: The study adopted a health care provider perspective. A probabilistic Markov model was applied to Thai HIV/AIDS patients aged 15 to 65 years. Input parameters were extracted from a cohort study of four …
Maleki, M, Majlesinasab, N and Sepehri, MM	Two new models for redeployment of ambulances		2014					Nowadays, in all countries, public resources for healthcare are inadequate to meet the demands for the services. Therefore, policy makers should provide the most effective healthcare services to citizens within the limited available resources. During the past decades, lots of research using operations research techniques, tools, and theories has been applied to a wide range of problems in healthc…
Maleta, K and Bowie, C	Selecting HIV infection prevention interventions in the mature HIV epidemic in Malawi using the mode of transmission model	BMC Health Services Research	2010	10	243			BACKGROUND: Malawi is reassessing its HIV prevention strategy in the light of a limited reduction in the epidemic. No community based incidence studies have been carried out in Malawi, so estimates of where new infections are occurring require the use of mathematical models and knowledge of the size and sexual behaviour of different groups. The results can help to choose where HIV prevention inte…
Manabe, YC, Hermans, SM, Lamorde, M, Castelnuovo, B, Mullins, CD and Kuznik, A	Rifampicin for continuation phase tuberculosis treatment in Uganda: a cost-effectiveness analysis	PLoS ONE [Electronic Resource]	2012	7	e39187			BACKGROUND: In Uganda, isoniazid plus ethambutol is used for 6 months (6HE) during the continuation treatment phase of new tuberculosis (TB) cases. However, the World Health Organization (WHO) recommends using isoniazid plus rifampicin for 4 months (4HR) instead of 6HE. We compared the impact of a continuation phase using 6HE or 4HR on total cost and expected mortality from the perspective of the…
Mandalakas, AM, Hesseling, AC, Gie, RP, Schaaf, HS, Marais, BJ and Sinanovic, E	Modelling the cost-effectiveness of strategies to prevent tuberculosis in child contacts in a high-burden setting	Thorax	2013	68	247-55			BACKGROUND: WHO recommends isoniazid preventive therapy (IPT) for young children in close contact with an infectious tuberculosis (TB) case. No models have examined the cost effectiveness of this recommendation.;METHODS: A decision analysis model was developed to estimate health and economic outcomes of five TB infection screening strategies in young household contacts. In the no-testing strategy…
Mandelblatt, JS, Lawrence, WF, Gaffikin, L, Limpahayom, KK, Lumbiganon, P, Warakamin, S, King, J, Yi, B, Ringers, P and Blumenthal, PD	Costs and benefits of different strategies to screen for cervical cancer in less-developed countries	Journal of the National Cancer Institute	2002	94	1469-83			BACKGROUND: About 80% of cervical cancers occur in less-developed countries. This disproportionate burden of cervical cancer in such countries is due mainly to the lack of well-organized screening programs. Several cervical cancer screening strategies have been proposed as more cost-effective than cytology screening. We compared the costs and benefits of different strategies and their effectivene…
Maredza, M, Bertram, MY, Saloojee, H, Chersich, MF, Tollman, SM and Hofman, KJ	Cost-effectiveness analysis of infant feeding strategies to prevent mother-to-child transmission of HIV in South Africa	Ajar-African Journal of Aids Research	2013	12	151-160			Despite increasing availability of perinatal interventions to prevent mother-to-child transmission (MTCT) of HIV in South Africa, MTCT remains high due to breastfeeding. To inform policy decisions in the country, cost-effectiveness of alternative infant-feeding interventions was conducted. Mathematical modelling was used to simulate post-natal transmission and mortality due to infant feeding in a…
Mariko, M	Quality of care and the demand for health services in Bamako, Mali: the specific roles of structural, process, and outcome components	Social Science & Medicine	2003	56	1183-96			The public finance and foreign exchange crisis of the 1980s aggravated the unfavourable economic trends in many developing countries and resulted in budget cuts in the health sector. Policymakers, following the suggestions of World Bank experts, introduced user fees. Economic analysis of the demand for health care in these countries focused on the impact of price and income on health service util…
Marinho Da Silva, ME, Santos, ER and Borenstein, D	Implementing regulation policy in Brazilian health care regulation centers	Medical Decision Making	2010	30	366-379			The regulation of specialist medical appointments represents one of the problematic areas of the Brazilian Public Health System. In this regulation process, 2 issues stand out: 1) which patients should have the highest attendance priority, and 2) which service suppliers can best resolve the specific health problem of a patient? Based on the consideration of the existing Brazilian context in the f…
Marseille, E, Kahn, JG, Billinghurst, K and Saba, J	Cost-effectiveness of the female condom in preventing HIV and STDs in commercial sex workers in rural South Africa	Social Science & Medicine	2001	52	135-48			We assessed the cost-effectiveness of the female condom (FC) in preventing HIV infection and other STDs among commercial sex workers (CSWs) and their clients in the Mpumulanga Province of South Africa. The health and economic outcomes of current levels of male condom (MC) use in 1000 CSWs who average 25 partners per year and have an HIV prevalence of 50.3% was compared with the expected outcomes …
Marseille, E, Kahn, JG, Mmiro, F, Guay, L, Musoke, P, Fowler, MG and Brooks Jackson, J	The cost effectiveness of a single-dose nevirapine regimen to mother and infant to reduce vertical HIV-1 transmission in sub-Saharan Africa	Annals of the New York Academy of Sciences	2000	918	53-56
Marseille, E, Kahn, JG, Pitter, C, Bunnell, R, Epalatai, W, Jawe, E, Were, W and Mermin, J	The cost effectiveness of home-based provision of antiretroviral therapy in rural Uganda	Applied Health Economics and Health Policy	2009	7	229-243			Background: Highly active antiretroviral therapy (HAART) provides dramatic health benefits for HIV-infected individuals in Africa, and widespread implementation of HAART is proceeding rapidly. Little is known about the cost and cost effectiveness of HAART programmes. Objective: To determine the incremental cost effectiveness of a home-based HAART programme in rural Uganda. Methods: A computer-bas…
Marseille, E, Lohse, N, Jiwani, A, Hod, M, Seshiah, V, Yajnik, CS, Arora, GP, Balaji, V, Henriksen, O, Lieberman, N, Chen, R, Damm, P, Metzger, BE and Kahn, JG	The cost-effectiveness of gestational diabetes screening including prevention of type 2 diabetes: application of a new model in India and Israel	Journal of Maternal-Fetal & Neonatal Medicine	2013	26	802-10			OBJECTIVE: Gestational diabetes mellitus (GDM) is associated with elevated risks of perinatal complications and type 2 diabetes mellitus, and screening and intervention can reduce these risks. We quantified the cost, health impact and cost-effectiveness of GDM screening and intervention in India and Israel, settings with contrasting epidemiologic and cost environments.;METHODS: We developed a dec…
Marseille, E, Saba, J, Muyingo, S and Kahn, JG	The costs and benefits of private sector provision of treatment to HIV-infected employees in Kampala, Uganda	Aids	2006	20	907-14			OBJECTIVES: The objective of this study was to determine the financial incentives that companies have to treat HIV-infected employees, in a health care services company in Kampala, Uganda.;DESIGN: Cost-benefit analysis from the company's perspective of three interventions to treat HIV-infected employees.;METHODS: The costs and benefits of each intervention were compared with no intervention and w…
Masiye, F	Investigating health system performance: an application of data envelopment analysis to Zambian hospitals	BMC Health Serv Res	2007	7	58			BACKGROUND: Zambia has recently articulated an ambitious national health program designed to meeting health-related MDGs. Public expectations are high and Zambia continues to receive significant resources from global and bilateral donors to support its health agenda. Although the lack of adequate resources presents the most important constraint, the efficiency with which available resources are b…
Maskery, B, Deroeck, D, Levin, A, Kim, YE, Wierzba, TF and Clemens, JD	Strategy, demand, management, and costs of an international cholera vaccine stockpile	Journal of Infectious Diseases	2013	208	S15-S22			In this article, we review the feasibility of mass vaccination against cholera and estimate the global population at risk for epidemic cholera. We then examine the cost of establishing and managing a cholera vaccine stockpile and summarize published mathematical models of the estimated impact of reactive vaccination campaigns developed for the current Haitian outbreak and a recent outbreak in Zim…
Mason, DP, Krudsood, S, Wilairatana, P, Viriyavejakul, P, Silachamroon, U, Chokejindachai, W, Singhasivanon, P, Supavej, S, McKenzie, FE and Looareesuwan, S	Can treatment of P. vivax lead to a unexpected appearance of falciparum malaria?	Southeast Asian Journal of Tropical Medicine & Public Health	2001	32	57-63			Of 994 patients admitted to the Bangkok Hospital for Tropical Diseases for P. vivax malaria, 104 (10.5%) experienced appearance of Plasmodiumfalciparum following drug treatment for P. vivax . In all patients, P. falciparum parasites were not found by microscopic examination upon admission. The mean time for P. falciparum appearance was 12.6 days after the commencement of chloroquine treatment. Pa…
Massad, E, Amaku, M, Coutinho, FAB, Kittayapong, P and Wilder-Smith, A	Theoretical impact of insecticideimpregnated school uniforms on dengue incidence in Thai children	Global Health Action	2013	6				Background: Children carry the main burden of morbidity and mortality caused by dengue. Childrenspend a considerable amount of their day at school; hence strategies that reduce human-mosquito contact to protect against the day-biting habits of Aedes mosquitoes at schools, such as insecticide-impregnated uniforms, could be an effective prevention strategy. Methodology: We used mathematical modelst…
Massad, E, Coutinho, FA, Chaib, E and Burattini, MN	Cost-effectiveness analysis of a hypothetical hepatitis C vaccine compared to antiviral therapy	Epidemiology & Infection	2009	137	241-9			We propose a mathematical model to simulate the dynamics of hepatitis C virus (HCV) infection in the state of Sao Paulo, Brazil. We assumed that a hypothetical vaccine, which cost was taken to be the initial cost of the vaccine against hepatitis B exists and it is introduced in the model. We computed its cost-effectiveness compared with the anti-HCV therapy. The calculated basic reproduction numb…
Massad, E, Coutinho, FAB, Burattini, MN, Lopez, LF and Struchiner, CJ	Modeling the impact of imperfect HIV vaccines on the incidence of the infection	Mathematical and Computer Modelling	2001	34	345-351			One concern about HIV vaccine trials is that participants might develop a false sense of security and increase their risk behavior. This fear has (at least partially) impaired the development of extensive clinical trials on HIV vaccines and are, in principle, justified. In this paper, we develop a dynamical model which allows experiments on the effects of an imperfect vaccine on a population pron…
Massad, E, Ortega, NRS, de Barros, LC and Struchiner, CJ	Fuzzy decision making in public health strategies	Studies in Fuzziness and Soft Computing	2008	232	97-110			Making decision is one of the most fundamental activities of human beings (Klir & Yuan, 1995; Yager & Filev, 1994; Zadeh, 1973). This is particularly true in Public Health where decisions usually have relevance for millions of people. In the field of vaccination strategies design, decision making concerning the target population for the immunization program, the proportion of susceptibles to be v…
Massote, AA, Caruso, D and Sousa, JBG	Application of discrete systems simulation to reduce waiting time in the outpatient service of a hospital in the city of S√£o Paulo, Brazil	1st International Workshop on Innovative Simulation for Health Care, IWISH 2012, Held at the International Multidisciplinary Modeling and Simulation Multiconference, I3M 2012	2012		156-161	Vienna	Caltek s.r.l.	This paper aims to analyze failures in a service at the arrhythmology outpatient units, using as support the simulation of discrete systems, the sizing of an outpatient service unit in terms of the nursing staff required, the room occupation and the waiting time. In particular, the cardiology outpatient service in a hospital located in S√£o Paulo, Brazil, is investigated. The simulation model dev…
Mathauer, I, Musango, L, Sibandze, S, Mthethwa, K and Carrin, G	Is universal coverage via social health insurance financially feasible in Swaziland?	South African Medical Journal	2011	101	179-183			Objective. The Government of Swaziland decided to explore the feasibility of social health insurance (SHI) in order to enhance universal access to health services. We assess the financial feasibility of a possible SHI scheme in Swaziland. The SHI scenario presented is one that mobilises resources additional to the maintained Ministry of Health and Social Welfare (MOHSW) budget. It is designed to …
[truncated: 465 more rows]
